# Supplementary material for: Genome-Wide Identification of the ARF Gene Family and ARF3 Target Genes Regulating Ovary Initiation in Hazel via ChIP Sequencing
Source: Front Plant Sci. 2021 Aug 10;12:715820. doi: 10.3389/fpls.2021.715820 (PMC8382943; doi:10.3389/fpls.2021.715820)
Supplement: Supplementary Table 3 — Significant enriched KEGG pathways at three ovule development stages in hazel. [file Table_3.XLSX]

## Sheet: Sheet1
Table S3 Significant enriched KEGG pathways at three ovule development stages in hazel
Gtoup	TermID	Description	Category	Gene ratio	Background ratio	Enrich factor	P-value
Stage Ov1.1	ko00030	Pentose phosphate pathway	Metabolism	8/284	17/2148	3.55924	0.0007
	ko00410	beta-Alanine metabolism	Metabolism	7/284	16/2148	3.30898	0.00259
	ko04920	Adipocytokine signaling pathway	Organismal Systems	4/284	6/2148	5.04225	0.00361
	ko01230	Biosynthesis of amino acids	Metabolism	22/284	96/2148	1.73327	0.0054
	ko01120	Microbial metabolism in diverse environments	Metabolism	29/284	138/2148	1.58941	0.0057
	ko00010	Glycolysis / Gluconeogenesis	Metabolism	10/284	32/2148	2.36356	0.00616
	ko04530	Tight junction	Cellular Processes	6/284	15/2148	3.02535	0.00893
	ko01110	Biosynthesis of secondary metabolites	Metabolism	65/284	382/2148	1.28696	0.0113
	ko01130	Biosynthesis of antibiotics	Metabolism	35/284	187/2148	1.41561	0.0164
	ko01200	Carbon metabolism	Metabolism	19/284	90/2148	1.59671	0.0226
	ko04626	Plant-pathogen interaction	Organismal Systems	8/284	28/2148	2.16097	0.0242
	ko04152	AMPK signaling pathway	Environmental Information Processing	7/284	23/2148	2.3019	0.0244
	ko00600	Sphingolipid metabolism	Metabolism	5/284	15/2148	2.52113	0.038
	ko00051	Fructose and mannose metabolism	Metabolism	6/284	20/2148	2.26901	0.039
	ko00430	Taurine and hypotaurine metabolism	Metabolism	2/284	3/2148	5.04225	0.0477
	ko00625	Chloroalkane and chloroalkene degradation	Metabolism	2/284	3/2148	5.04225	0.0477
Stage Ov2.1	ko00940	Phenylpropanoid biosynthesis	Metabolism	8/235	19/2148	3.8486	0.000471
	ko04075	Plant hormone signal transduction	Environmental Information Processing	12/235	41/2148	2.67525	0.000965
	ko00592	alpha-Linolenic acid metabolism	Metabolism	6/235	14/2148	3.91732	0.00227
	ko04710	Circadian rhythm	Organismal Systems	4/235	7/2148	5.2231	0.00374
	ko01110	Biosynthesis of secondary metabolites	Metabolism	56/235	382/2148	1.33996	0.00795
	ko04626	Plant-pathogen interaction	Organismal Systems	8/235	28/2148	2.61155	0.00807
	ko04016	MAPK signaling pathway - plant	Environmental Information Processing	9/235	35/2148	2.35039	0.0106
	ko04146	Peroxisome	Cellular Processes	9/235	35/2148	2.35039	0.0106
	ko00945	Stilbenoid, diarylheptanoid and gingerol biosynthesis	Metabolism	3/235	5/2148	5.48426	0.0109
	ko04072	Phospholipase D signaling pathway	Environmental Information Processing	4/235	9/2148	4.06241	0.0113
	ko00500	Starch and sucrose metabolism	Metabolism	8/235	30/2148	2.43745	0.0125
	ko04144	Endocytosis	Cellular Processes	12/235	55/2148	1.99428	0.0133
	ko00360	Phenylalanine metabolism	Metabolism	5/235	15/2148	3.04681	0.018
	ko04024	cAMP signaling pathway	Environmental Information Processing	3/235	7/2148	3.91732	0.0324
	ko00905	Brassinosteroid biosynthesis	Metabolism	3/235	8/2148	3.42766	0.0477
Stage Ov3.1	ko00940	Phenylpropanoid biosynthesis	Metabolism	6/150	19/2148	4.5221	0.00133
	ko04925	Aldosterone synthesis and secretion	Organismal Systems	2/150	2/2148	14.32	0.00485
	ko00900	Terpenoid backbone biosynthesis	Metabolism	6/150	28/2148	3.06857	0.0109
	ko04070	Phosphatidylinositol signaling system	Environmental Information Processing	5/150	22/2148	3.25454	0.0155
	ko04075	Plant hormone signal transduction	Environmental Information Processing	7/150	41/2148	2.44488	0.0211
	ko04626	Plant-pathogen interaction	Organismal Systems	5/150	28/2148	2.55714	0.0413
