# Supplementary material for: Genome-Wide Identification of the ARF Gene Family and ARF3 Target Genes Regulating Ovary Initiation in Hazel via ChIP Sequencing
Source: Front Plant Sci. 2021 Aug 10;12:715820. doi: 10.3389/fpls.2021.715820 (PMC8382943; doi:10.3389/fpls.2021.715820)
Supplement: Supplementary Table 4 — ChARF3 regulated target genes at three ovule development stages. [file Table_4.XLSX]

## Sheet: Ov1.1
							Table S4 ChARF3 regulated target genes at three ovule development stages
peak_name	原排序	seqnames	start	end	width	strand	Gene ID	fold_enrichment	annotation	log2(Ov2/Ov1)	padj	regulated	kegg	go	nr	trembl	swissprot	pfam	kog	tf	IPR
HLJ_peak_6	6	tig00000184	1930	2275	346	*	Cor0203980.1	4.0605	Distal Intergenic	1.39062	6.34399e-132	up	K06692//26S proteasome non-ATPase regulatory subunit 5	GO:0043248//biological_process proteasome assembly	PREDICTED: uncharacterized protein LOC109012887 isoform X1 [Juglans regia]	uncharacterized protein LOC109012887 isoform X1 {ECO:0000313|RefSeq:XP_018850309.1} OS=Juglans regia (English walnut) Name=LOC109012887 {ECO:0000313|RefSeq:XP_018850309.1} PE=4	N/A	N/A	[O] KOG4413 26S proteasome regulatory complex, subunit PSMD5	N/A	IPR019538; 26S proteasome non-ATPase regulatory subunit 5
HLJ_peak_8	8	tig00000186	104208	104484	277	*	Cor0209120.1	3.84679	Distal Intergenic	1.03948	3.40453e-18	up	K13348//protein Mpv17	GO:0016021//cellular_component integral component of membrane	PREDICTED: uncharacterized protein LOC108993109 isoform X2 [Juglans regia]	uncharacterized protein LOC108993109 isoform X2 {ECO:0000313|RefSeq:XP_018823428.1} OS=Juglans regia (English walnut) Name=LOC108993109 {ECO:0000313|RefSeq:XP_018823428.1} PE=4	N/A	Mpv17 / PMP22 family	[R] KOG1944 Peroxisomal membrane protein MPV17 and related proteins	N/A	IPR007248; Mpv17/PMP22
HLJ_peak_10	10	tig00000187	39785	40281	497	*	Cor0218050.1	3.84679	Promoter (1-2kb)	1.57339	0.0273768	up	N/A	N/A	hypothetical protein L484_010181 [Morus notabilis] >EXB37708.1 hypothetical protein L484_010181 [Morus notabilis]	Uncharacterized protein {ECO:0000313|EMBL:EXB37708.1} OS=Morus notabilis ORFNames=L484_010181 {ECO:0000313|EMBL:EXB37708.1} PE=4	N/A	N/A	N/A	N/A	N/A
HLJ_peak_19	19	tig00000217	247861	248357	497	*	Cor0209040.1	4.0605	Promoter (<=1kb)	1.57067	9.17992e-11	up	N/A	GO:0004672//molecular_function protein kinase activity;GO:0005524//molecular_function ATP binding;GO:0006468//biological_process protein phosphorylation;GO:0048544//biological_process recognition of pollen	PREDICTED: uncharacterized protein LOC109013535 [Juglans regia]	uncharacterized protein LOC109013535 {ECO:0000313|RefSeq:XP_018851216.1} OS=Juglans regia (English walnut) Name=LOC109013535 {ECO:0000313|RefSeq:XP_018851216.1} PE=4	G-type lectin S-receptor-like serine/threonine-protein kinase At4g27290 EC=2.7.11.1 Precursor OS=Arabidopsis thaliana (Mouse-ear cress) OrderedLocusNames=At4g27290 ORFNames=M4I22.100 PE=3	PAN-like domain	[T] LSE0015 A Receptor-like protein kinase, contains lectin domains	N/A	IPR003609; PAN/Apple domain
HLJ_peak_28	28	tig00000511	174795	175183	389	*	Cor0205710.1	2.72779	Promoter (1-2kb)	2.49398	0	up	N/A	N/A	uncharacterized protein LOC105641533 [Jatropha curcas]	Uncharacterized protein {ECO:0000313|EMBL:KDP29949.1} OS=Jatropha curcas (Barbados nut) ORFNames=JCGZ_18518 {ECO:0000313|EMBL:KDP29949.1} PE=4	Protein ACTIVITY OF BC1 COMPLEX KINASE 7, chloroplastic {ECO:0000303|PubMed:22694836} Short=ABC1-LIKE KINASE 7 {ECO:0000303|PubMed:22694836} EC=2.7.11.1 {ECO:0000250|UniProtKB:Q9MA15} Salt-induced ABC1 kinase 1, chloroplastic {ECO:0000303|PubMed:24117441} Short=AtSIA1 {ECO:0000303|PubMed:24117441} Precursor OS=Arabidopsis thaliana (Mouse-ear cress) MLP3.15 {ECO:0000312|EMBL:AAF13088.1} PE=1	N/A	[R] KOG1235 Predicted unusual protein kinase	N/A	N/A
HLJ_peak_34	34	tig00000573	149888	150538	651	*	Cor0212360.1	3.16742	Intron (Cor0212350.1/Cor0212350, intron 6 of 6)	2.24108	2.2769e-181	up	N/A	GO:0046872//molecular_function metal ion binding;GO:0003676//molecular_function nucleic acid binding	hypothetical protein CISIN_1g007997mg [Citrus sinensis]	Uncharacterized protein {ECO:0000313|EMBL:SPD34066.1} OS=Fagus sylvatica (Beechnut) ORFNames=FSB_LOCUS61948 {ECO:0000313|EMBL:SPD34066.1} PE=4	Zinc finger CCCH domain-containing protein 18 Short=AtC3H18 EC=3.1.-.- OS=Arabidopsis thaliana (Mouse-ear cress) OrderedLocusNames=At2g05160 ORFNames=F5G3.6 PE=2	OST-HTH/LOTUS domain	[RA] LSE0467 A Predicted RNA-binding protein, contains C3H1-type Zn-finger and RRM domains	N/A	IPR025605; OST-HTH/LOTUS domain
HLJ_peak_50	50	tig00001247	239767	240238	472	*	Cor0198080.1	3.63308	Exon (Cor0198080.1/Cor0198080, exon 10 of 12)	1.63194	4.64802e-67	up	K03243//translation initiation factor 5B	GO:0003924//molecular_function GTPase activity;GO:0005525//molecular_function GTP binding	PREDICTED: eukaryotic translation initiation factor 5B [Juglans regia] >XP_018848182.1 PREDICTED: eukaryotic translation initiation factor 5B [Juglans regia]	eukaryotic translation initiation factor 5B {ECO:0000313|RefSeq:XP_018848181.1, ECO:0000313|RefSeq:XP_018848182.1} OS=Juglans regia (English walnut) ECO:0000313|RefSeq:XP_018848182.1} PE=4	Translation initiation factor IF-2, chloroplastic OS=Rhodomonas salina (Cryptomonas salina) Name=infB PE=3	Translation-initiation factor 2	[J] KOG1144 Translation initiation factor 5B (eIF-5B)	N/A	IPR023115; Translation initiation factor IF- 2, domain 3
HLJ_peak_55	55	tig00001424	73802	74492	691	*	Cor0221080.1	3.65756	Exon (Cor0221090.1/Cor0221090, exon 5 of 5)	2.713	1.08089e-137	up	N/A	N/A	PREDICTED: uncharacterized protein ycf36 [Juglans regia]	Uncharacterized protein {ECO:0000313|EMBL:SPD27851.1} OS=Fagus sylvatica (Beechnut) ORFNames=FSB_LOCUS55733 {ECO:0000313|EMBL:SPD27851.1} PE=4	Protein CONSERVED IN THE GREEN LINEAGE AND DIATOMS 27, chloroplastic {ECO:0000303|PubMed:23043051} Precursor OS=Arabidopsis thaliana (Mouse-ear cress) ORFNames=K8K14.9 {ECO:0000312|EMBL:BAB09022.1} PE=2	Protein of unknown function (DUF1230)	[X] LSE1666 A Unnamed protein	N/A	IPR009631; CGLD27-like
HLJ_peak_59	59	tig00001578	49452	49740	289	*	Cor0220270.1	2.71089	Distal Intergenic	2.28125	9.03776e-132	up	N/A	GO:0003824//molecular_function catalytic activity	PREDICTED: monoacylglycerol lipase abhd6-A-like [Juglans regia]	monoacylglycerol lipase abhd6-A-like {ECO:0000313|RefSeq:XP_018860339.1} OS=Juglans regia (English walnut) Name=LOC109022020 {ECO:0000313|RefSeq:XP_018860339.1} PE=4	N/A	Alpha/beta hydrolase family	[R] KOG1454 Predicted hydrolase/acyltransferase (alpha/beta hydrolase superfamily)	N/A	IPR000639; Epoxide hydrolase-like
HLJ_peak_71	71	tig00001727	19352	20001	650	*	Cor0215360.1	4.0605	Promoter (<=1kb)	2.8999	5.13965e-17	up	N/A	GO:0004672//molecular_function protein kinase activity;GO:0005524//molecular_function ATP binding;GO:0006468//biological_process protein phosphorylation;GO:0006950//biological_process response to stress	PREDICTED: probable receptor-like serine/threonine-protein kinase At5g57670 [Juglans regia]	Uncharacterized protein {ECO:0000313|EMBL:SPD26009.1} OS=Fagus sylvatica (Beechnut) {ECO:0000313|EMBL:SPD26009.1} PE=4	Probable receptor-like serine/threonine-protein kinase At5g57670 EC=2.7.11.1 OS=Arabidopsis thaliana (Mouse-ear cress) OrderedLocusNames=At5g57670 ORFNames=MRI1.2 PE=2	Universal stress protein family	[T] KOG1187 Serine/threonine protein kinase	N/A	IPR006016; UspA
HLJ_peak_83	83	tig00002064	132278	132671	394	*	Cor0218280.1	3.49468	Promoter (<=1kb)	5.07398	2.42794e-221	up	N/A	GO:0016747//molecular_function transferase activity, transferring acyl groups other than amino-acyl groups	PREDICTED: spermidine coumaroyl-CoA acyltransferase-like [Juglans regia]	Uncharacterized protein {ECO:0000313|EMBL:SPC99810.1} OS=Fagus sylvatica (Beechnut) ORFNames=FSB_LOCUS27692 {ECO:0000313|EMBL:SPC99810.1} PE=4	Spermidine coumaroyl-CoA acyltransferase {ECO:0000303|PubMed:19168716} Short=SCT {ECO:0000303|PubMed:19168716} Short=Spermidine dicoumaroyl transferase {ECO:0000303|PubMed:19168716} EC=2.3.1.249 {ECO:0000269|PubMed:19168716} OS=Arabidopsis thaliana (Mouse-ear cress) ORFNames=F13D4.110 PE=1	Transferase family	[RQ] LSE0273 A Predicted N-hydroxycinnamoyl/benzoyltransferase	N/A	IPR003480; Transferase
HLJ_peak_84	84	tig00002071	32518	33013	496	*	Cor0212790.1	4.22751	Exon (Cor0212790.1/Cor0212790, exon 6 of 12)	1.48564	2.75253e-165	up	K18151//ureidoglycolate amidohydrolase [EC:3.5.1.116]	GO:0008152//biological_process metabolic process;GO:0016787//molecular_function hydrolase activity;GO:0016813//molecular_function hydrolase activity, acting on carbon-nitrogen (but not peptide) bonds, in linear amidines	PREDICTED: ureidoglycolate hydrolase [Juglans regia]	ureidoglycolate hydrolase {ECO:0000313|RefSeq:XP_018813395.1} OS=Juglans regia (English walnut) Name=LOC108985520 {ECO:0000313|RefSeq:XP_018813395.1} PE=4	Ureidoglycolate hydrolase {ECO:0000303|PubMed:23940254} Short=AtUAH {ECO:0000303|PubMed:23940254} EC=3.5.1.116 {ECO:0000269|PubMed:19935661, ECO:0000269|PubMed:25020232} Allantoate amidohydrolase 2 {ECO:0000303|PubMed:19935661} Short=AtAHH2 {ECO:0000303|PubMed:19935661} Ureidoglycolate amidohydrolase {ECO:0000303|PubMed:23940254} Precursor OS=Arabidopsis thaliana (Mouse-ear cress) ORFNames=K9D7.1…	Peptidase family M20/M25/M40	[X] LSE1822 A Unnamed protein	N/A	IPR010158; Amidase, carbamoylase-type
HLJ_peak_85	85	tig00002072	105211	105582	372	*	Cor0218990.1	3.02981	Promoter (<=1kb)	3.08319	2.93587e-13	up	K07437//cytochrome P450 family 26 subfamily A	GO:0005506//molecular_function iron ion binding;GO:0016705//molecular_function oxidoreductase activity, acting on paired donors, with incorporation or reduction of molecular oxygen;GO:0020037//molecular_function heme binding;GO:0055114//biological_process oxidation-reduction process	PREDICTED: taxadiene 5-alpha hydroxylase-like [Juglans regia]	taxadiene 5-alpha hydroxylase-like {ECO:0000313|RefSeq:XP_018853643.1} OS=Juglans regia (English walnut) Name=LOC109015631 {ECO:0000313|RefSeq:XP_018853643.1} PE=3	Cytochrome P450 716B2 EC=1.14.-.- Cytochrome P450 CYPA2 OS=Picea sitchensis (Sitka spruce) (Pinus sitchensis) Name=CYP716B2 PE=2	Cytochrome P450	[QI] KOG0157 Cytochrome P450 CYP4/CYP19/CYP26 subfamilies	N/A	IPR002397; Cytochrome P450, B-class
HLJ_peak_87	87	tig00002074	98073	98710	638	*	Cor0214780.1	4.11771	Promoter (<=1kb)	1.04843	9.03254e-28	up	N/A	N/A	PREDICTED: uncharacterized protein LOC109000898 [Juglans regia]	uncharacterized protein LOC109000898 {ECO:0000313|RefSeq:XP_018833485.1} OS=Juglans regia (English walnut) Name=LOC109000898 {ECO:0000313|RefSeq:XP_018833485.1} PE=4	N/A	N/A	N/A	N/A	IPR026847; Vacuolar protein sorting-associated protein 13
HLJ_peak_95	95	tig00002118	185635	186052	418	*	Cor0202630.1	3.41937	Promoter (<=1kb)	1.67142	0.000398091	up	N/A	N/A	PREDICTED: protein LURP-one-related 15 [Theobroma cacao]	UPF0706 protein, putative isoform 1 {ECO:0000313|EMBL:EOY04534.1} OS=Theobroma cacao (Cacao) (Cocoa) ORFNames=TCM_019772 {ECO:0000313|EMBL:EOY04534.1} PE=4	Protein LURP-one-related 15 OS=Arabidopsis thaliana (Mouse-ear cress) OrderedLocusNames=At5g01750 ORFNames=T20L15.20 PE=1	LURP-one-related	[X] LSE1210 A Unnamed protein	N/A	IPR007612; LURP-one-related
HLJ_peak_112	112	tig00006868	419038	419325	288	*	Cor0126590.1	3.74449	Downstream (2-3kb)	1.74565	2.32366e-61	up	N/A	N/A	PREDICTED: CASP-like protein 1F1 [Juglans regia]	CASP-like protein {ECO:0000256|RuleBase:RU361233} OS=Juglans regia (English walnut) Name=LOC108999372 {ECO:0000313|RefSeq:XP_018831839.1} PE=3	CASP-like protein 1F2 Short=PtCASPL1F2 OS=Populus trichocarpa (Western balsam poplar) (Populus balsamifera subsp. trichocarpa) ORFNames=POPTRDRAFT_823430 PE=3	Domain of unknown function (DUF588)	[X] LSE0664 A Unnamed protein	N/A	IPR006702; Domain of unknown function DUF588
HLJ_peak_113	113	tig00006868	675285	675769	485	*	Cor0126860.1	3.84679	Distal Intergenic	3.97561	2.70445e-98	up	N/A	N/A	PREDICTED: 11-beta-hydroxysteroid dehydrogenase 1B [Eucalyptus grandis] >KCW83128.1 hypothetical protein EUGRSUZ_B00089 [Eucalyptus grandis]	Uncharacterized protein {ECO:0000313|EMBL:KCW83128.1} OS=Eucalyptus grandis (Flooded gum) ORFNames=EUGRSUZ_B00089 {ECO:0000313|EMBL:KCW83128.1} PE=3	11-beta-hydroxysteroid dehydrogenase 1A EC=1.1.1.146 17-beta-hydroxysteroid dehydrogenase 1A EC=1.1.1.- Hydroxysteroid dehydrogenase 1 Short=AtHSD1 OS=Arabidopsis thaliana (Mouse-ear cress) Name=HSD1 OrderedLocusNames=At5g50600 ORFNames=MBA10.16 PE=1	short chain dehydrogenase	[Q] KOG1205 Predicted dehydrogenase	N/A	IPR002347; Short-chain dehydrogenase/reductase SDR
HLJ_peak_124	124	tig00006870	1173424	1173784	361	*	Cor0120500.1	2.40724	Promoter (<=1kb)	2.13111	4.33873e-17	up	K16276//zinc finger protein-like protein	N/A	PREDICTED: uncharacterized protein LOC108990166 isoform X1 [Juglans regia]	uncharacterized protein LOC108990166 isoform X3 {ECO:0000313|RefSeq:XP_018819590.1} OS=Juglans regia (English walnut) Name=LOC108990166 {ECO:0000313|RefSeq:XP_018819590.1} PE=4	Zinc finger protein BRUTUS-like At1g18910 {ECO:0000305} OS=Arabidopsis thaliana (Mouse-ear cress) ORFNames=F14D16.3 {ECO:0000312|EMBL:AAF79306.1} PE=2	N/A	[R] KOG1940 Zn-finger protein	N/A	N/A
HLJ_peak_126	126	tig00006870	1206428	1207395	968	*	Cor0120550.1	3.50644	Promoter (1-2kb)	1.42119	1.40559e-43	up	N/A	N/A	PREDICTED: HIPL1 protein-like [Juglans regia]	HIPL1 protein-like {ECO:0000313|RefSeq:XP_018831429.1} OS=Juglans regia (English walnut) Name=LOC108999084 {ECO:0000313|RefSeq:XP_018831429.1} PE=4	HIPL1 protein Precursor OS=Arabidopsis thaliana (Mouse-ear cress) Name=HIPL1 OrderedLocusNames=At1g74790 ORFNames=F25A4.24 PE=3	Glucose / Sorbosone dehydrogenase	[T] TWOG0158 Hedgehog-interacting protein and related proteins	N/A	IPR012938; Glucose/Sorbosone dehydrogenase
HLJ_peak_133	133	tig00006874	86528	86965	438	*	Cor0133460.1	3.63308	Intron (Cor0133470.1/Cor0133470, intron 45 of 56)	2.49526	0	up	N/A	GO:0003950//molecular_function NAD+ ADP-ribosyltransferase activity	delta-pyrroline-5-carboxylate dehydrogenase 1 [Betula platyphylla]	Poly [ADP-ribose] polymerase {ECO:0000256|RuleBase:RU362114} Short=PARP {ECO:0000256|RuleBase:RU362114} EC=2.4.2.- {ECO:0000256|RuleBase:RU362114} OS=Betula platyphylla (Asian white birch) Name=P5CDH1 {ECO:0000313|EMBL:AKN79304.1} PE=2	Probable inactive poly [ADP-ribose] polymerase SRO5 Protein SIMILAR TO RCD ONE 5 OS=Arabidopsis thaliana (Mouse-ear cress) Name=SRO5 OrderedLocusNames=At5g62520 ORFNames=K19B1.13 PE=1	Poly(ADP-ribose) polymerase catalytic domain	[X] LSE1265 A Unnamed protein	N/A	IPR022003; RST domain of plant C-terminal
HLJ_peak_141	141	tig00006874	977822	978152	331	*	Cor0134220.1	2.84581	Promoter (<=1kb)	1.52006	1.75327e-29	up	N/A	N/A	PREDICTED: C2 and GRAM domain-containing protein At5g50170 isoform X1 [Juglans regia]	C2 and GRAM domain-containing protein At5g50170 isoform X1 {ECO:0000313|RefSeq:XP_018813871.1} OS=Juglans regia (English walnut) Name=LOC108985870 {ECO:0000313|RefSeq:XP_018813871.1} PE=4	C2 and GRAM domain-containing protein At5g50170 OS=Arabidopsis thaliana (Mouse-ear cress) OrderedLocusNames=At5g50170 ORFNames=K6A12_3 PE=2	GRAM domain	[S] KOG1032 Uncharacterized conserved protein, contains GRAM domain	N/A	IPR031968; VASt domain
HLJ_peak_148	148	tig00006876	468371	468899	529	*	Cor0142470.1	3.20566	Distal Intergenic	1.44748	1.14625e-108	up	K15177//RNA polymerase-associated protein LEO1	GO:0006368//biological_process transcription elongation from RNA polymerase II promoter;GO:0016570//biological_process histone modification;GO:0016593//cellular_component Cdc73/Paf1 complex	PREDICTED: protein LEO1 homolog isoform X1 [Vitis vinifera]	Uncharacterized protein {ECO:0000313|EMBL:SPD10516.1} OS=Fagus sylvatica (Beechnut) ORFNames=FSB_LOCUS38398 {ECO:0000313|EMBL:SPD10516.1} PE=4	Protein LEO1 homolog {ECO:0000305} Protein VERNALIZATION INDEPENDENCE 4 {ECO:0000303|PubMed:12207655} OS=Arabidopsis thaliana (Mouse-ear cress) ORFNames=MAF19.15 {ECO:0000312|EMBL:BAB10377.1} PE=1	Leo1-like protein	[S] KOG2428 Uncharacterized conserved protein	N/A	IPR007149; Leo1-like protein
HLJ_peak_162	162	tig00006882	506410	506827	418	*	Cor0048530.1	2.5376	Promoter (<=1kb)	1.01351	8.14951e-08	up	N/A	GO:0003677//molecular_function DNA binding	PREDICTED: putative B3 domain-containing protein Os03g0621600 [Juglans regia]	putative B3 domain-containing protein Os03g0621600 {ECO:0000313|RefSeq:XP_018830210.1} OS=Juglans regia (English walnut) Name=LOC108998183 {ECO:0000313|RefSeq:XP_018830210.1} PE=4	N/A	B3 DNA binding domain	N/A	http://plntfdb.bio.uni-potsdam.de/v3.0/fam_mem.php?family_id=ABI3VP1	IPR003340; B3 DNA binding domain
HLJ_peak_166	166	tig00006882	2439286	2439618	333	*	Cor0050010.1	3.75893	Promoter (2-3kb)	1.39084	3.5414e-81	up	K05658//ATP-binding cassette, subfamily B (MDR/TAP), member 1 [EC:3.6.3.44]	GO:0005524//molecular_function ATP binding;GO:0016021//cellular_component integral component of membrane;GO:0042626//molecular_function ATPase activity, coupled to transmembrane movement of substances;GO:0055085//biological_process transmembrane transport;GO:0016887//molecular_function ATPase activity	PREDICTED: ABC transporter B family member 2-like [Juglans regia]	Uncharacterized protein {ECO:0000313|EMBL:SPC96428.1} OS=Fagus sylvatica (Beechnut) ORFNames=FSB_LOCUS24310 {ECO:0000313|EMBL:SPC96428.1} PE=4	ABC transporter B family member 2 Short=ABC transporter ABCB.2 Short=AtABCB2 Multidrug resistance protein 2 P-glycoprotein 2 Precursor OS=Arabidopsis thaliana (Mouse-ear cress) ORFNames=F20B18.70 PE=1	ABC transporter	[Q] KOG0055 Multidrug/pheromone exporter, ABC superfamily	N/A	IPR011527; ABC transporter type 1, transmembrane domain
HLJ_peak_169	169	tig00006884	88127	88382	256	*	Cor0040780.1	3.0738	Exon (Cor0040780.1/Cor0040780, exon 4 of 5)	1.54754	2.79237e-20	up	K14638//solute carrier family 15 (peptide/histidine transporter), member 3/4	GO:0016020//cellular_component membrane;GO:0022857//molecular_function transmembrane transporter activity;GO:0055085//biological_process transmembrane transport	PREDICTED: protein NRT1/ PTR FAMILY 7.3-like [Juglans regia]	protein NRT1/ PTR FAMILY 7.3-like {ECO:0000313|RefSeq:XP_018842624.1} OS=Juglans regia (English walnut) Name=LOC109007412 {ECO:0000313|RefSeq:XP_018842624.1} PE=4	Protein NRT1/ PTR FAMILY 7.3 Short=AtNPF7.3 Nitrate transporter 1.5 OS=Arabidopsis thaliana (Mouse-ear cress) ORFNames=F5D14.23 PE=1	POT family	[E] KOG1237 H+/oligopeptide symporter	N/A	IPR000109; Proton-dependent oligopeptide transporter family
HLJ_peak_176	176	tig00006884	1022143	1022587	445	*	Cor0041480.1	3.41937	Downstream (2-3kb)	2.69759	6.33672e-19	up	N/A	GO:0003333//biological_process amino acid transmembrane transport;GO:0015171//molecular_function amino acid transmembrane transporter activity;GO:0016020//cellular_component membrane	PREDICTED: cationic amino acid transporter 6, chloroplastic-like [Juglans regia]	cationic amino acid transporter 6, chloroplastic-like {ECO:0000313|RefSeq:XP_018837030.1} OS=Juglans regia (English walnut) Name=LOC109003370 {ECO:0000313|RefSeq:XP_018837030.1} PE=4	Cationic amino acid transporter 6, chloroplastic Precursor OS=Arabidopsis thaliana (Mouse-ear cress) Name=CAT6 OrderedLocusNames=At5g04770 ORFNames=T1E3.130 PE=2	Amino acid permease	[E] KOG1286 Amino acid transporters	N/A	IPR002293; Amino acid/polyamine transporter I
HLJ_peak_187	187	tig00006888	2605688	2605955	268	*	Cor0055970.1	2.82037	Promoter (2-3kb)	1.32873	1.43511e-28	up	N/A	GO:0005506//molecular_function iron ion binding;GO:0016705//molecular_function oxidoreductase activity, acting on paired donors, with incorporation or reduction of molecular oxygen;GO:0020037//molecular_function heme binding;GO:0055114//biological_process oxidation-reduction process	7-ethoxycoumarin O-deethylase-like [Prunus avium]	Cytochrome P450 76M5-like {ECO:0000313|EMBL:PQQ19907.1} OS=Prunus yedoensis var. nudiflora ORFNames=Pyn_18787 {ECO:0000313|EMBL:PQQ19907.1} PE=3	Cytochrome P450 93A3 EC=1.14.-.- Cytochrome P450 CP5 OS=Glycine max (Soybean) (Glycine hispida) Name=CYP93A3 PE=2	Cytochrome P450	[Q] KOG0156 Cytochrome P450 CYP2 subfamily	N/A	IPR002401; Cytochrome P450, E-class, group I
HLJ_peak_194	194	tig00006896	995174	995539	366	*	Cor0154390.1	3.23925	Exon (Cor0154380.1/Cor0154380, exon 7 of 7)	1.6513	3.07686e-76	up	K04464//mitogen-activated protein kinase 7 [EC:2.7.11.24]	GO:0004672//molecular_function protein kinase activity;GO:0005524//molecular_function ATP binding;GO:0006468//biological_process protein phosphorylation	mitogen-activated protein kinase 4 [Betula platyphylla]	Mitogen-activated protein kinase {ECO:0000256|RuleBase:RU361165, ECO:0000256|SAAS:SAAS00574127} EC=2.7.11.24 {ECO:0000256|RuleBase:RU361165, ECO:0000256|SAAS:SAAS00574127} OS=Betula platyphylla (Asian white birch) PE=2	Mitogen-activated protein kinase 2 Short=MAP kinase 2 EC=2.7.11.24 OS=Oryza sativa subsp. japonica (Rice) ORFNames=P0438H08.24 PE=2	Protein kinase domain	[T] KOG0660 Mitogen-activated protein kinase	N/A	IPR000719; Protein kinase domain
HLJ_peak_198	198	tig00006898	382403	382721	319	*	Cor0170090.1	3.66767	Exon (Cor0170090.1/Cor0170090, exon 3 of 7)	2.62536	1.29631e-104	up	K17686//Cu+-exporting ATPase [EC:3.6.3.54]	GO:0030001//biological_process metal ion transport;GO:0046872//molecular_function metal ion binding	PREDICTED: probable copper-transporting ATPase HMA5 [Juglans regia]	probable copper-transporting ATPase HMA5 {ECO:0000313|RefSeq:XP_018852466.1} OS=Juglans regia (English walnut) Name=LOC109014454 {ECO:0000313|RefSeq:XP_018852466.1} PE=3	Probable copper-transporting ATPase HMA5 EC=7.2.2.8 Probable copper-transporting ATPase 3 Protein HEAVY METAL ATPASE 5 OS=Arabidopsis thaliana (Mouse-ear cress) Name=HMA5 OrderedLocusNames=At1g63440 ORFNames=F2K11.18 PE=1	E1-E2 ATPase	[P] KOG0207 Cation transport ATPase	N/A	IPR006121; Heavy metal-associated domain, HMA
HLJ_peak_200	200	tig00006898	694128	694580	453	*	Cor0170340.1	3.5611	Exon (Cor0170340.1/Cor0170340, exon 5 of 5)	2.41645	0.0160586	up	K15095//(+)-neomenthol dehydrogenase [EC:1.1.1.208]	N/A	PREDICTED: uncharacterized protein LOC108997035 [Juglans regia]	Uncharacterized protein {ECO:0000313|EMBL:SPD21901.1} OS=Fagus sylvatica (Beechnut) ORFNames=FSB_LOCUS49783 {ECO:0000313|EMBL:SPD21901.1} PE=3	Salutaridine reductase {ECO:0000303|PubMed:16968522} EC=1.1.1.248 {ECO:0000269|PubMed:16968522, ECO:0000269|PubMed:19648114} OS=Papaver somniferum (Opium poppy) Name=SALR {ECO:0000303|PubMed:16968522} PE=1	short chain dehydrogenase	[Q] KOG1208 Dehydrogenases with different specificities (related to short-chain alcohol dehydrogenases)	N/A	IPR002347; Short-chain dehydrogenase/reductase SDR
HLJ_peak_207	207	tig00006902	1972708	1973010	303	*	Cor0082390.1	3.84679	Promoter (2-3kb)	1.90611	4.24526e-147	up	N/A	GO:0003677//molecular_function DNA binding;GO:0006355//biological_process regulation of transcription, DNA-templated	dof zinc finger protein DOF4.6-like [Herrania umbratica]	dof zinc finger protein DOF4.6-like {ECO:0000313|RefSeq:XP_018824384.1} OS=Juglans regia (English walnut) Name=LOC108993804 {ECO:0000313|RefSeq:XP_018824384.1} PE=4	Dof zinc finger protein DOF4.6 {ECO:0000303|PubMed:12475498} Short=AtDOF4.6 {ECO:0000303|PubMed:12475498} OS=Arabidopsis thaliana (Mouse-ear cress) ORFNames=T19F6.13 {ECO:0000312|EMBL:CAB51649.1} PE=2	Dof domain, zinc finger	[R] LSE0455 A Dof Zn-finger protein	http://plntfdb.bio.uni-potsdam.de/v3.0/fam_mem.php?family_id=C2C2-Dof	IPR003851; Zinc finger, Dof-type
HLJ_peak_211	211	tig00006902	2473013	2473306	294	*	Cor0082840.1	2.78125	Exon (Cor0082840.1/Cor0082840, exon 9 of 10)	1.30754	1.48813e-22	up	K00001//alcohol dehydrogenase [EC:1.1.1.1]	GO:0055114//biological_process oxidation-reduction process	PREDICTED: alcohol dehydrogenase-like 4 [Juglans regia]	Uncharacterized protein {ECO:0000313|EMBL:SPD22513.1} OS=Fagus sylvatica (Beechnut) ORFNames=FSB_LOCUS50395 {ECO:0000313|EMBL:SPD22513.1} PE=3	Alcohol dehydrogenase-like 3 EC=1.1.1.1 {ECO:0000250|UniProtKB:P06525} OS=Arabidopsis thaliana (Mouse-ear cress) OrderedLocusNames=At1g32780 ORFNames=F6N18.16 PE=2	Zinc-binding dehydrogenase	[Q] KOG0022 Alcohol dehydrogenase, class III	N/A	IPR013154; Alcohol dehydrogenase, N-terminal
HLJ_peak_215	215	tig00006905	60688	61013	326	*	Cor0213040.1	3.20566	Promoter (<=1kb)	1.09539	4.0082e-57	up	N/A	GO:0003677//molecular_function DNA binding	PREDICTED: zinc finger BED domain-containing protein RICESLEEPER 1-like [Juglans regia] >XP_018813150.1 PREDICTED: zinc finger BED domain-containing protein RICESLEEPER 1-like [Juglans regia]	zinc finger BED domain-containing protein RICESLEEPER 1-like {ECO:0000313|RefSeq:XP_018813149.1, ECO:0000313|RefSeq:XP_018813150.1} OS=Juglans regia (English walnut) ECO:0000313|RefSeq:XP_018813150.1} PE=4	Zinc finger BED domain-containing protein RICESLEEPER 1 Transposase-like protein RICESLEEPER 1 OS=Oryza sativa subsp. japonica (Rice) ORFNames=OJ1122_B08, OsJ_17746 PE=3	Domain of unknown function (DUF4413)	[L] KOG1121 Tam3-transposase (Ac family)	N/A	IPR025525; hAT-like transposase, RNase-H fold
HLJ_peak_227	227	tig00006925	288003	288253	251	*	Cor0044110.1	2.5376	Promoter (<=1kb)	1.39617	8.32504e-151	up	N/A	GO:0005515//molecular_function protein binding	PREDICTED: probable LRR receptor-like serine/threonine-protein kinase At1g07650 isoform X1 [Juglans regia]	probable LRR receptor-like serine/threonine-protein kinase At1g07650 isoform X1 {ECO:0000313|RefSeq:XP_018858735.1} OS=Juglans regia (English walnut) Name=LOC109020672 {ECO:0000313|RefSeq:XP_018858735.1} PE=4	Probable leucine-rich repeat receptor-like serine/threonine-protein kinase At3g14840 EC=2.7.11.1 Precursor OS=Arabidopsis thaliana (Mouse-ear cress) Name=LRR-RLK OrderedLocusNames=At3g14840 ORFNames=T21E2.2 PE=1	N/A	[T] LSE0002 A Receptor protein kinase containing LRR repeats	N/A	IPR001611; Leucine-rich repeat
HLJ_peak_239	239	tig00006927	1218816	1219198	383	*	Cor0096370.1	3.20566	Promoter (<=1kb)	2.42754	1.43337e-80	up	K14484//auxin-responsive protein IAA	GO:0005515//molecular_function protein binding;GO:0005634//cellular_component nucleus;GO:0006355//biological_process regulation of transcription, DNA-templated	PREDICTED: auxin-responsive protein IAA20-like [Juglans regia] >XP_018857882.1 PREDICTED: auxin-responsive protein IAA20-like [Juglans regia]	Auxin-responsive protein {ECO:0000256|RuleBase:RU004549} OS=Juglans regia (English walnut) Synonyms=LOC109019950 {ECO:0000313|RefSeq:XP_018857882.1} PE=3	Auxin-responsive protein IAA30 Indoleacetic acid-induced protein 30 OS=Arabidopsis thaliana (Mouse-ear cress) Name=IAA30 OrderedLocusNames=At3g62100 ORFNames=T17J13.60 PE=2	AUX/IAA family	[TR] LSE0302 A Auxin-inducible protein	N/A	IPR033389; AUX/IAA domain
HLJ_peak_241	241	tig00006927	1522443	1522873	431	*	Cor0096590.1	3.75071	Distal Intergenic	1.69911	7.77398e-69	up	N/A	N/A	hypothetical protein CCACVL1_22043 [Corchorus capsularis]	Uncharacterized protein {ECO:0000313|EMBL:SPC92534.1} OS=Fagus sylvatica (Beechnut) ORFNames=FSB_LOCUS20416 {ECO:0000313|EMBL:SPC92534.1} PE=4	Protein RADIALIS-like 3 Short=AtRL3 Short=Protein RAD-like 3 OS=Arabidopsis thaliana (Mouse-ear cress) Name=RL3 OrderedLocusNames=At4g36570 ORFNames=AP22.24, C7A10.790 PE=2	N/A	[O] KOG0724 Zuotin and related molecular chaperones (DnaJ superfamily), contains DNA-binding domains	http://plntfdb.bio.uni-potsdam.de/v3.0/fam_mem.php?family_id=MYB-related	IPR001005; SANT/Myb domain
HLJ_peak_250	250	tig00006933	194284	195065	782	*	Cor0179100.1	2.52764	Promoter (1-2kb)	4.15606	3.79199e-27	up	N/A	GO:0004190//molecular_function aspartic-type endopeptidase activity;GO:0006508//biological_process proteolysis	PREDICTED: aspartic proteinase nepenthesin-1-like [Prunus mume]	Uncharacterized protein {ECO:0000313|EMBL:EMJ02846.1} OS=Prunus persica (Peach) (Amygdalus persica) ORFNames=PRUPE_ppa021937mg {ECO:0000313|EMBL:EMJ02846.1} PE=3	Probable aspartic protease At2g35615 EC=3.4.-.- Precursor OS=Arabidopsis thaliana (Mouse-ear cress) OrderedLocusNames=At2g35615 ORFNames=T20F21 PE=3	Xylanase inhibitor C-terminal	[O] KOG1339 Aspartyl protease	N/A	IPR033121; Peptidase family A1 domain
HLJ_peak_251	251	tig00006933	547573	547923	351	*	Cor0179400.1	3.14364	Exon (Cor0179400.1/Cor0179400, exon 12 of 12)	1.03959	2.57428e-62	up	N/A	N/A	uncharacterized protein LOC110614539 isoform X4 [Manihot esculenta]	Uncharacterized protein {ECO:0000313|EMBL:OAY49623.1} OS=Manihot esculenta (Cassava) (Jatropha manihot) ORFNames=MANES_05G070100 {ECO:0000313|EMBL:OAY49623.1} PE=4	Probable aldo-keto reductase 1 Short=GmAKR1 EC=1.1.1.- OS=Glycine max (Soybean) (Glycine hispida) Name=AKR1 PE=2	Aldo/keto reductase family	[C] KOG1575 Voltage-gated shaker-like K+ channel, subunit beta/KCNAB	N/A	IPR023210; NADP-dependent oxidoreductase domain
HLJ_peak_269	269	tig00006943	2259599	2259913	315	*	Cor0067420.1	5.98389	Promoter (<=1kb)	1.08108	7.02778e-74	up	K01537//Ca2+-transporting ATPase [EC:3.6.3.8]	GO:0016021//cellular_component integral component of membrane	PREDICTED: putative calcium-transporting ATPase 13, plasma membrane-type [Juglans regia]	Calcium-transporting ATPase {ECO:0000256|RuleBase:RU361146} EC=7.2.2.10 {ECO:0000256|RuleBase:RU361146} OS=Fagus sylvatica (Beechnut) ORFNames=FSB_LOCUS58160 {ECO:0000313|EMBL:SPD30278.1} PE=3	Putative calcium-transporting ATPase 13, plasma membrane-type EC=7.2.2.10 Ca(2+)-ATPase isoform 13 OS=Arabidopsis thaliana (Mouse-ear cress) Name=ACA13 OrderedLocusNames=At3g22910 ORFNames=F5N5.8 PE=3	E1-E2 ATPase	[P] KOG0204 Calcium transporting ATPase	N/A	IPR006068; Cation-transporting P-type ATPase, C-terminal
HLJ_peak_283	283	tig00006945	1307661	1307938	278	*	Cor0125790.1	2.73819	Intron (Cor0125790.1/Cor0125790, intron 20 of 22)	2.87327	0	up	K01897//long-chain acyl-CoA synthetase [EC:6.2.1.3]	GO:0003824//molecular_function catalytic activity;GO:0008152//biological_process metabolic process	PREDICTED: long chain acyl-CoA synthetase 7, peroxisomal-like isoform X1 [Juglans regia]	long chain acyl-CoA synthetase 7, peroxisomal-like isoform X1 {ECO:0000313|RefSeq:XP_018845886.1} OS=Juglans regia (English walnut) Name=LOC109009739 {ECO:0000313|RefSeq:XP_018845886.1} PE=4	Long chain acyl-CoA synthetase 7, peroxisomal EC=6.2.1.3 OS=Arabidopsis thaliana (Mouse-ear cress) Name=LACS7 OrderedLocusNames=At5g27600 ORFNames=F15A18.60 PE=1	AMP-binding enzyme	[I] KOG1256 Long-chain acyl-CoA synthetases (AMP-forming)	N/A	IPR000873; AMP-dependent synthetase/ligase
HLJ_peak_289	289	tig00006949	54370	54700	331	*	Cor0063210.1	4.48792	Promoter (<=1kb)	2.28751	0.00730261	up	N/A	N/A	hypothetical protein POPTR_013G007900v3 [Populus trichocarpa]	Uncharacterized protein {ECO:0000313|EMBL:PNT06012.1} OS=Populus trichocarpa (Western balsam poplar) (Populus balsamifera subsp. trichocarpa) ORFNames=POPTR_013G007900 {ECO:0000313|EMBL:PNT06012.1} PE=4	N/A	N/A	N/A	N/A	N/A
HLJ_peak_291	291	tig00006949	114184	114431	248	*	Cor0063310.1	3.48738	Promoter (1-2kb)	2.1699	1.01204e-07	up	N/A	GO:0004650//molecular_function polygalacturonase activity;GO:0005975//biological_process carbohydrate metabolic process	PREDICTED: polygalacturonase At1g48100-like [Juglans regia]	polygalacturonase At1g48100-like {ECO:0000313|RefSeq:XP_018816453.1} OS=Juglans regia (English walnut) Name=LOC108987870 {ECO:0000313|RefSeq:XP_018816453.1} PE=3	Polygalacturonase At1g48100 Short=PG EC=3.2.1.15 Pectinase At1g48100 Precursor OS=Arabidopsis thaliana (Mouse-ear cress) OrderedLocusNames=At1g48100 ORFNames=F21D18.17, F21D18.18 PE=2	Glycosyl hydrolases family 28	[R] TWOG0115 Endo-polygalacturonase	N/A	IPR006626; Parallel beta-helix repeat
HLJ_peak_294	294	tig00006949	412608	412935	328	*	Cor0063680.1	3.20566	Distal Intergenic	4.44281	0	up	N/A	N/A	hypothetical protein PRUPE_6G304300 [Prunus persica]	Uncharacterized protein {ECO:0000313|EMBL:SPD30554.1} OS=Fagus sylvatica (Beechnut) ORFNames=FSB_LOCUS58436 {ECO:0000313|EMBL:SPD30554.1} PE=4	N/A	N/A	N/A	N/A	N/A
HLJ_peak_304	304	tig00006949	2699616	2699934	319	*	Cor0066000.1	3.36326	Promoter (1-2kb)	1.29521	1.24165e-51	up	K08472//mlo protein	GO:0006952//biological_process defense response;GO:0016021//cellular_component integral component of membrane	PREDICTED: MLO-like protein 4 isoform X1 [Juglans regia] >XP_018829603.1 PREDICTED: MLO-like protein 4 isoform X2 [Juglans regia]	MLO-like protein {ECO:0000256|RuleBase:RU280816} OS=Juglans regia (English walnut) Synonyms=MLO {ECO:0000256|RuleBase:RU280816} PE=3	MLO-like protein 4 Short=AtMlo4 OS=Arabidopsis thaliana (Mouse-ear cress) Name=MLO4 OrderedLocusNames=At1g11000 ORFNames=T19D16.26 PE=2	Mlo family	[R] LSE0264 A Seven transmembrane protein Mlo	N/A	IPR004326; Mlo-related protein
HLJ_peak_305	305	tig00006949	2747867	2748197	331	*	Cor0066050.1	3.30117	Promoter (1-2kb)	2.8402	3.83153e-260	up	N/A	GO:0000155//molecular_function phosphorelay sensor kinase activity;GO:0007165//biological_process signal transduction	PREDICTED: histidine kinase 1-like isoform X2 [Juglans regia]	histidine kinase 1-like isoform X2 {ECO:0000313|RefSeq:XP_018829637.1} OS=Juglans regia (English walnut) Name=LOC108997719 {ECO:0000313|RefSeq:XP_018829637.1} PE=4	Histidine kinase 1 EC=2.7.13.3 Arabidopsis histidine kinase 1 Short=AtHK1 Protein AUTHENTIC HIS-KINASE 1 OS=Arabidopsis thaliana (Mouse-ear cress) Name=AHK1 OrderedLocusNames=At2g17820 ORFNames=T13L16.16, T17A5 PE=1	His Kinase A (phospho-acceptor) domain	[T] KOG0519 Sensory transduction histidine kinase	N/A	IPR003661; Signal transduction histidine kinase, dimerisation/phosphoacceptor domain
HLJ_peak_307	307	tig00006949	2752223	2752575	353	*	Cor0066060.1	2.40404	Promoter (<=1kb)	2.8402	3.83153e-260	up	N/A	GO:0000160//biological_process phosphorelay signal transduction system	PREDICTED: histidine kinase 1-like isoform X1 [Juglans regia]	histidine kinase 1-like isoform X1 {ECO:0000313|RefSeq:XP_018829636.1} OS=Juglans regia (English walnut) Name=LOC108997719 {ECO:0000313|RefSeq:XP_018829636.1} PE=4	Histidine kinase 1 EC=2.7.13.3 Arabidopsis histidine kinase 1 Short=AtHK1 Protein AUTHENTIC HIS-KINASE 1 OS=Arabidopsis thaliana (Mouse-ear cress) Name=AHK1 OrderedLocusNames=At2g17820 ORFNames=T13L16.16, T17A5 PE=1	N/A	[T] KOG0519 Sensory transduction histidine kinase	N/A	IPR001789; Signal transduction response regulator, receiver domain
HLJ_peak_308	308	tig00006952	114348	114595	248	*	Cor0197570.1	2.82646	Promoter (2-3kb)	1.61774	1.90857e-139	up	N/A	GO:0009058//biological_process biosynthetic process;GO:0016844//molecular_function strictosidine synthase activity	PREDICTED: protein STRICTOSIDINE SYNTHASE-LIKE 6-like isoform X2 [Juglans regia]	Uncharacterized protein {ECO:0000313|EMBL:SPC74333.1} OS=Fagus sylvatica (Beechnut) ORFNames=FSB_LOCUS2215 {ECO:0000313|EMBL:SPC74333.1} PE=4	Protein STRICTOSIDINE SYNTHASE-LIKE 5 {ECO:0000303|PubMed:10777701} Short=AtSSL5 {ECO:0000303|PubMed:10777701} Protein YELLOW-LEAF-SPECIFIC GENE 2 {ECO:0000303|PubMed:11230571} Precursor OS=Arabidopsis thaliana (Mouse-ear cress) ORFNames=F26O13.70 {ECO:0000312|EMBL:CAB63007.1} PE=2	Strictosidine synthase	[R] KOG1520 Predicted alkaloid synthase/Surface mucin Hemomucin	N/A	IPR018119; Strictosidine synthase, conserved region
HLJ_peak_327	327	tig00006961	231998	232321	324	*	Cor0205120.1	3.14537	Promoter (<=1kb)	3.48269	2.72037e-07	up	N/A	GO:0004672//molecular_function protein kinase activity;GO:0005524//molecular_function ATP binding;GO:0006468//biological_process protein phosphorylation;GO:0048544//biological_process recognition of pollen;GO:0004674//molecular_function protein serine/threonine kinase activity	PREDICTED: G-type lectin S-receptor-like serine/threonine-protein kinase At4g27290 [Juglans regia]	G-type lectin S-receptor-like serine/threonine-protein kinase At4g27290 {ECO:0000313|RefSeq:XP_018823692.1} OS=Juglans regia (English walnut) Name=LOC108993282 {ECO:0000313|RefSeq:XP_018823692.1} PE=4	G-type lectin S-receptor-like serine/threonine-protein kinase At4g27290 EC=2.7.11.1 Precursor OS=Arabidopsis thaliana (Mouse-ear cress) OrderedLocusNames=At4g27290 ORFNames=M4I22.100 PE=3	Domain of unknown function (DUF3403)	[T] LSE0015 A Receptor-like protein kinase, contains lectin domains	N/A	IPR021820; S-locus receptor kinase, C-terminal
HLJ_peak_331	331	tig00006967	269201	269460	260	*	Cor0111320.1	3.50821	Intron (Cor0111320.1/Cor0111320, intron 5 of 6)	1.76509	1.28217e-09	up	N/A	GO:0006629//biological_process lipid metabolic process	Patatin/Phospholipase A2-related [Macleaya cordata]	Patatin {ECO:0000256|RuleBase:RU361262} EC=3.1.1.- {ECO:0000256|RuleBase:RU361262} OS=Fagus sylvatica (Beechnut) {ECO:0000313|EMBL:SPD13066.1} PE=3	Patatin-like protein 2 Short=AtPLP2 EC=3.1.1.- Patatin-related phospholipase A IIalpha Short=pPLAIIa Phospholipase A IIA Short=AtPLAIIA OS=Arabidopsis thaliana (Mouse-ear cress) Name=PLP2 OrderedLocusNames=At2g26560 ORFNames=T9J22.23 PE=1	Patatin-like phospholipase	[I] KOG0513 Ca2+-independent phospholipase A2	N/A	IPR002641; Patatin-like phospholipase domain
HLJ_peak_333	333	tig00006967	344850	345156	307	*	Cor0111380.1	2.69603	Promoter (1-2kb)	1.34128	2.63048e-48	up	K15777//4,5-DOPA dioxygenase extradiol [EC:1.13.11.-]	GO:0006725//biological_process cellular aromatic compound metabolic process;GO:0008198//molecular_function ferrous iron binding;GO:0016491//molecular_function oxidoreductase activity	PREDICTED: extradiol ring-cleavage dioxygenase-like [Juglans regia]	extradiol ring-cleavage dioxygenase-like {ECO:0000313|RefSeq:XP_018809229.1} OS=Juglans regia (English walnut) Name=LOC108982340 {ECO:0000313|RefSeq:XP_018809229.1} PE=4	Extradiol ring-cleavage dioxygenase Short=AtLigB EC=1.13.11.- OS=Arabidopsis thaliana (Mouse-ear cress) Name=LIGB OrderedLocusNames=At4g15093 ORFNames=dl3590w PE=2	Catalytic LigB subunit of aromatic ring-opening dioxygenase	[S] TWOG0099 Uncharacterized protein	N/A	IPR004183; Extradiol ring-cleavage dioxygenase, class III enzyme, subunit B
HLJ_peak_334	334	tig00006967	783449	784232	784	*	Cor0111810.1	5.34276	Exon (Cor0111800.1/Cor0111800, exon 16 of 19)	2.6569	1.30869e-238	up	N/A	GO:0016021//cellular_component integral component of membrane;GO:0022857//molecular_function transmembrane transporter activity;GO:0055085//biological_process transmembrane transport;GO:0016020//cellular_component membrane	PREDICTED: sugar carrier protein A-like [Juglans regia]	sugar carrier protein A-like {ECO:0000313|RefSeq:XP_018806334.1} OS=Juglans regia (English walnut) Name=LOC108979983 {ECO:0000313|RefSeq:XP_018806334.1} PE=3	Sugar carrier protein A OS=Ricinus communis (Castor bean) Name=STA PE=2	Sugar (and other) transporter	[R] KOG0254 Predicted transporter (major facilitator superfamily)	N/A	IPR020846; Major facilitator superfamily domain
HLJ_peak_356	356	tig00006975	354818	355091	274	*	Cor0042680.1	3.41937	Exon (Cor0042680.1/Cor0042680, exon 7 of 8)	1.3008	4.09018e-70	up	K03327//multidrug resistance protein, MATE family	GO:0006855//biological_process drug transmembrane transport;GO:0015238//molecular_function drug transmembrane transporter activity;GO:0015297//molecular_function antiporter activity;GO:0016020//cellular_component membrane;GO:0055085//biological_process transmembrane transport	PREDICTED: protein DETOXIFICATION 16-like [Juglans regia]	Protein DETOXIFICATION {ECO:0000256|RuleBase:RU004914} Multidrug and toxic compound extrusion protein {ECO:0000256|RuleBase:RU004914} OS=Juglans regia (English walnut) Name=LOC108983811 {ECO:0000313|RefSeq:XP_018811123.1} PE=3	Protein DETOXIFICATION 16 {ECO:0000303|PubMed:11739388} Short=AtDTX16 {ECO:0000303|PubMed:11739388} Multidrug and toxic compound extrusion protein 16 {ECO:0000305} Short=MATE protein 16 {ECO:0000305} OS=Arabidopsis thaliana (Mouse-ear cress) ORFNames=K24M7.20 {ECO:0000312|EMBL:BAB10542.1} PE=2	MatE	[R] KOG1347 Uncharacterized membrane protein, predicted efflux pump	N/A	IPR002528; Multi antimicrobial extrusion protein
HLJ_peak_358	358	tig00006975	1673967	1674299	333	*	Cor0043150.1	1.30673	Distal Intergenic	3.65801	3.80814e-149	up	#N/A	#N/A	#N/A	#N/A	#N/A	#N/A	#N/A	#N/A	#N/A
HLJ_peak_359	359	tig00006975	1860196	1860503	308	*	Cor0043210.1	3.14537	Promoter (<=1kb)	1.03903	3.38516e-103	up	K16276//zinc finger protein-like protein	GO:0008270//molecular_function zinc ion binding	PREDICTED: uncharacterized protein LOC108998380 [Juglans regia] >XP_018830477.1 PREDICTED: uncharacterized protein LOC108998380 [Juglans regia] >XP_018830484.1 PREDICTED: uncharacterized protein LOC108998380 [Juglans regia]	uncharacterized protein LOC108998380 {ECO:0000313|RefSeq:XP_018830473.1, ECO:0000313|RefSeq:XP_018830477.1, ECO:0000313|RefSeq:XP_018830484.1} OS=Juglans regia (English walnut) ECO:0000313|RefSeq:XP_018830477.1, ECO:0000313|RefSeq:XP_018830484.1} PE=4	Zinc finger protein BRUTUS {ECO:0000303|PubMed:20675571} Protein EMBRYO DEFECTIVE 2454 {ECO:0000303|PubMed:20675571} OS=Arabidopsis thaliana (Mouse-ear cress) ORFNames=MIE15.8 {ECO:0000312|EMBL:BAB01179.1} PE=1	CHY zinc finger	[R] KOG1940 Zn-finger protein	N/A	IPR017921; Zinc finger, CTCHY-type
HLJ_peak_360	360	tig00006975	1865267	1865621	355	*	Cor0043220.1	2.65114	Promoter (<=1kb)	2.50536	3.37252e-39	up	N/A	N/A	PREDICTED: uncharacterized protein LOC108998401 [Juglans regia]	uncharacterized protein LOC108998401 {ECO:0000313|RefSeq:XP_018830496.1} OS=Juglans regia (English walnut) Name=LOC108998401 {ECO:0000313|RefSeq:XP_018830496.1} PE=4	N/A	N/A	[X] LSE2083 A Unnamed protein	N/A	N/A
HLJ_peak_367	367	tig00006975	3560474	3560806	333	*	Cor0043840.1	3.84679	Distal Intergenic	2.97254	0.0074693	up	N/A	N/A	PREDICTED: transcription factor DICHOTOMA-like [Juglans regia]	transcription factor DICHOTOMA-like {ECO:0000313|RefSeq:XP_018825368.1} OS=Juglans regia (English walnut) Name=LOC108994571 {ECO:0000313|RefSeq:XP_018825368.1} PE=4	Transcription factor TCP18 Protein BRANCHED 1 Protein TEOSINTE BRANCHED 1-LIKE 1 OS=Arabidopsis thaliana (Mouse-ear cress) ORFNames=K24M9.4 PE=1	TCP family transcription factor	[K] LSE0380 A Predicted bHLH transcription factor	http://plntfdb.bio.uni-potsdam.de/v3.0/fam_mem.php?family_id=TCP	IPR017888; CYC/TB1, R domain
HLJ_peak_374	374	tig00006985	1915925	1916223	299	*	Cor0022710.1	2.54625	Distal Intergenic	1.83401	3.0525e-225	up	K00284//glutamate synthase (ferredoxin) [EC:1.4.7.1]	GO:0008152//biological_process metabolic process;GO:0016491//molecular_function oxidoreductase activity;GO:0055114//biological_process oxidation-reduction process;GO:0006537//biological_process glutamate biosynthetic process;GO:0015930//molecular_function glutamate synthase activity;GO:0016638//molecular_function oxidoreductase activity, acting on the CH-NH2 group of donors;GO:0006807//biological…	PREDICTED: ferredoxin-dependent glutamate synthase, chloroplastic-like isoform X1 [Juglans regia]	ferredoxin-dependent glutamate synthase, chloroplastic-like isoform X1 {ECO:0000313|RefSeq:XP_018826298.1} OS=Juglans regia (English walnut) Name=LOC108995228 {ECO:0000313|RefSeq:XP_018826298.1} PE=4	Ferredoxin-dependent glutamate synthase 1, chloroplastic/mitochondrial EC=1.4.7.1 Fd-GOGAT 1 Precursor OS=Arabidopsis thaliana (Mouse-ear cress) ORFNames=F21E1_60 PE=1	Glutamate synthase central domain	[E] KOG0399 Glutamate synthase	N/A	IPR017932; Glutamine amidotransferase type 2 domain
HLJ_peak_375	375	tig00006985	2188489	2188869	381	*	Cor0022800.1	3.02981	Exon (Cor0022800.1/Cor0022800, exon 3 of 3)	4.25001	1.1018e-83	up	N/A	GO:0009058//biological_process biosynthetic process;GO:0016844//molecular_function strictosidine synthase activity	PREDICTED: protein STRICTOSIDINE SYNTHASE-LIKE 2-like [Juglans regia]	protein STRICTOSIDINE SYNTHASE-LIKE 2-like {ECO:0000313|RefSeq:XP_018848407.1} OS=Juglans regia (English walnut) Name=LOC109011595 {ECO:0000313|RefSeq:XP_018848407.1} PE=4	Protein STRICTOSIDINE SYNTHASE-LIKE 2 {ECO:0000303|PubMed:10777701} Short=AtSSL2 {ECO:0000303|PubMed:10777701} Strictosidine synthase {ECO:0000303|PubMed:10394954} Strictosidine synthase 10 {ECO:0000303|PubMed:19121120} Short=AtSS10 {ECO:0000303|PubMed:19121120} Precursor OS=Arabidopsis thaliana (Mouse-ear cress) ORFNames=F13H10.16 {ECO:0000312|EMBL:AAC78543.1} PE=2	Strictosidine synthase	[R] KOG1520 Predicted alkaloid synthase/Surface mucin Hemomucin	N/A	IPR018119; Strictosidine synthase, conserved region
HLJ_peak_390	390	tig00006988	333246	333624	379	*	Cor0167400.1	2.40404	Promoter (<=1kb)	4.38593	0	up	N/A	N/A	PREDICTED: protein LNK3-like isoform X1 [Juglans regia]	protein LNK3-like isoform X2 {ECO:0000313|RefSeq:XP_018818404.1} OS=Juglans regia (English walnut) Name=LOC108989290 {ECO:0000313|RefSeq:XP_018818404.1} PE=4	Protein LNK3 {ECO:0000303|PubMed:23818596} Night light-inducible and clock-regulated 3 {ECO:0000303|PubMed:23818596} OS=Arabidopsis thaliana (Mouse-ear cress) T2E22.34 {ECO:0000312|EMBL:AAG51013.1} PE=1	N/A	[X] LSE1762 A Unnamed protein	N/A	N/A
HLJ_peak_393	393	tig00006988	556345	556745	401	*	Cor0167620.1	3.1322	Promoter (1-2kb)	2.82068	2.63924e-68	up	K14972//PAX-interacting protein 1	N/A	PREDICTED: mediator of RNA polymerase II transcription subunit 15a-like [Juglans regia]	Uncharacterized protein {ECO:0000313|EMBL:SPD24598.1} OS=Fagus sylvatica (Beechnut) ORFNames=FSB_LOCUS52480 {ECO:0000313|EMBL:SPD24598.1} PE=4	Mediator of RNA polymerase II transcription subunit 15a OS=Arabidopsis thaliana (Mouse-ear cress) ORFNames=F7H2.12 PE=1	N/A	[X] LSE1648 A Unnamed protein	N/A	N/A
HLJ_peak_396	396	tig00006990	674473	674776	304	*	Cor0115340.1	3.20566	Downstream (2-3kb)	1.41871	6.86213e-18	up	N/A	GO:0004857//molecular_function enzyme inhibitor activity	hypothetical protein CICLE_v10023652mg [Citrus clementina] >ESR58720.1 hypothetical protein CICLE_v10023652mg [Citrus clementina] >GAY57887.1 hypothetical protein CUMW_182920 [Citrus unshiu]	Uncharacterized protein {ECO:0000313|EMBL:ESR58720.1} OS=Citrus clementina ORFNames=CICLE_v10023652mg {ECO:0000313|EMBL:ESR58720.1} PE=4	Putative invertase inhibitor Pollen allergen Pla a 1 Precursor OS=Platanus acerifolia (London plane tree) PE=1	Plant invertase/pectin methylesterase inhibitor	N/A	N/A	IPR006501; Pectinesterase inhibitor domain
HLJ_peak_410	410	tig00006992	3142138	3142438	301	*	Cor0015580.1	2.25989	Exon (Cor0015590.1/Cor0015590, exon 19 of 19)	1.12333	9.09644e-41	up	N/A	N/A	PREDICTED: uncharacterized protein LOC109009365 [Juglans regia]	uncharacterized protein LOC109009365 {ECO:0000313|RefSeq:XP_018845364.1} OS=Juglans regia (English walnut) Name=LOC109009365 {ECO:0000313|RefSeq:XP_018845364.1} PE=4	N/A	N/A	N/A	N/A	N/A
HLJ_peak_432	432	tig00006996	1455421	1455675	255	*	Cor0100160.1	3.45169	Promoter (1-2kb)	1.06522	1.50987e-36	up	K13946//auxin influx carrier (AUX1 LAX family)	N/A	PREDICTED: auxin transporter-like protein 5 [Juglans regia]	auxin transporter-like protein 5 {ECO:0000313|RefSeq:XP_018823726.1} OS=Juglans regia (English walnut) Name=LOC108993301 {ECO:0000313|RefSeq:XP_018823726.1} PE=4	Auxin transporter-like protein 5 AUX1-like protein 5 MtLAX5 OS=Medicago truncatula (Barrel medic) (Medicago tribuloides) Name=LAX5 PE=2	Transmembrane amino acid transporter protein	[E] KOG1303 Amino acid transporters	N/A	IPR013057; Amino acid transporter, transmembrane domain
HLJ_peak_437	437	tig00006996	1835175	1835551	377	*	Cor0100570.1	2.74721	Promoter (2-3kb)	2.45502	0.00276865	up	N/A	GO:0046983//molecular_function protein dimerization activity	PREDICTED: transcription factor ABORTED MICROSPORES-like isoform X1 [Juglans regia]	Uncharacterized protein {ECO:0000313|EMBL:SPC88140.1} OS=Fagus sylvatica (Beechnut) ORFNames=FSB_LOCUS16022 {ECO:0000313|EMBL:SPC88140.1} PE=4	Transcription factor ABORTED MICROSPORES Basic helix-loop-helix protein 21 Short=AtbHLH21 Short=bHLH 21 Transcription factor EN 48 bHLH transcription factor bHLH021 OS=Arabidopsis thaliana (Mouse-ear cress) ORFNames=F12A24.9 PE=1	bHLH-MYC and R2R3-MYB transcription factors N-terminal	[KT] LSE0107 A bHLH transcription factor	http://plntfdb.bio.uni-potsdam.de/v3.0/fam_mem.php?family_id=bHLH	IPR025610; Transcription factor MYC/MYB N-terminal
HLJ_peak_441	441	tig00007000	371761	372065	305	*	Cor0181910.1	3.20566	Promoter (<=1kb)	2.50303	1.08064e-189	up	N/A	GO:0006855//biological_process drug transmembrane transport;GO:0015238//molecular_function drug transmembrane transporter activity;GO:0015297//molecular_function antiporter activity;GO:0016020//cellular_component membrane;GO:0055085//biological_process transmembrane transport	PREDICTED: protein DETOXIFICATION 45, chloroplastic-like [Juglans regia] >XP_018841536.1 PREDICTED: protein DETOXIFICATION 45, chloroplastic-like [Juglans regia]	Protein DETOXIFICATION {ECO:0000256|RuleBase:RU004914} Multidrug and toxic compound extrusion protein {ECO:0000256|RuleBase:RU004914} OS=Juglans regia (English walnut) ECO:0000313|RefSeq:XP_018841536.1} PE=3	Protein DETOXIFICATION 45, chloroplastic {ECO:0000303|PubMed:11739388} Short=AtDTX45 {ECO:0000303|PubMed:11739388} Multidrug and toxic compound extrusion protein 45 {ECO:0000305} Short=MATE protein 45 {ECO:0000305} Precursor OS=Arabidopsis thaliana (Mouse-ear cress) ORFNames=F22I13.150 {ECO:0000312|EMBL:CAB37494.1} PE=2	MatE	[R] KOG1347 Uncharacterized membrane protein, predicted efflux pump	N/A	IPR002528; Multi antimicrobial extrusion protein
HLJ_peak_445	445	tig00007002	1330776	1331027	252	*	Cor0005180.1	3.20566	Distal Intergenic	1.32023	2.40206e-117	up	N/A	N/A	PREDICTED: myb family transcription factor EFM-like [Juglans regia]	Uncharacterized protein {ECO:0000313|EMBL:SPC79491.1} OS=Fagus sylvatica (Beechnut) ORFNames=FSB_LOCUS7373 {ECO:0000313|EMBL:SPC79491.1} PE=4	Myb family transcription factor EFM {ECO:0000303|PubMed:25132385} MYB-domain transcription factor HHO4 {ECO:0000305} Protein EARLY FLOWERING MYB {ECO:0000303|PubMed:25132385} Protein HRS1 HOMOLOG 4 {ECO:0000305} OS=Arabidopsis thaliana (Mouse-ear cress) ORFNames=T4M8.7 {ECO:0000312|EMBL:AAL31188.1} PE=1	Myb-like DNA-binding domain	[RK] LSE0452 A MYB transcription factor	http://plntfdb.bio.uni-potsdam.de/v3.0/fam_mem.php?family_id=G2-like	IPR017930; Myb domain
HLJ_peak_450	450	tig00007002	3290078	3290445	368	*	Cor0006000.1	2.8696	Distal Intergenic	1.97893	3.06581e-13	up	K00666//fatty-acyl-CoA synthase [EC:6.2.1.-]	GO:0003824//molecular_function catalytic activity;GO:0008152//biological_process metabolic process	PREDICTED: probable acyl-activating enzyme 1, peroxisomal [Juglans regia]	Uncharacterized protein {ECO:0000313|EMBL:SPC95555.1} OS=Fagus sylvatica (Beechnut) ORFNames=FSB_LOCUS23437 {ECO:0000313|EMBL:SPC95555.1} PE=4	Probable acyl-activating enzyme 1, peroxisomal EC=6.2.1.- AMP-binding protein 1 Short=AtAMPBP1 OS=Arabidopsis thaliana (Mouse-ear cress) ORFNames=F5M15.12 PE=2	AMP-binding enzyme	[I] KOG1176 Acyl-CoA synthetase	N/A	IPR000873; AMP-dependent synthetase/ligase
HLJ_peak_470	470	tig00007008	1953410	1953794	385	*	Cor0001410.1	2.96758	Distal Intergenic	1.72991	7.12517e-26	up	N/A	GO:0046856//biological_process phosphatidylinositol dephosphorylation	PREDICTED: type I inositol polyphosphate 5-phosphatase 8 isoform X2 [Juglans regia]	type I inositol polyphosphate 5-phosphatase 8 isoform X2 {ECO:0000313|RefSeq:XP_018847722.1} OS=Juglans regia (English walnut) Name=LOC109011111 {ECO:0000313|RefSeq:XP_018847722.1} PE=4	Type I inositol polyphosphate 5-phosphatase 8 {ECO:0000305} Short=At5PTase8 {ECO:0000305} EC=3.1.3.- {ECO:0000305} OS=Arabidopsis thaliana (Mouse-ear cress) ORFNames=F3G5.23 {ECO:0000312|EMBL:AAC98062.1} PE=2	Endonuclease/Exonuclease/phosphatase family	[U] KOG0565 Inositol polyphosphate 5-phosphatase and related proteins	N/A	IPR005135; Endonuclease/exonuclease/phosphatase
HLJ_peak_473	473	tig00007008	2329526	2329945	420	*	Cor0001700.1	2.86301	Exon (Cor0001700.1/Cor0001700, exon 5 of 10)	1.2032	1.40858e-44	up	K15728//phosphatidate phosphatase LPIN [EC:3.1.3.4]	N/A	PREDICTED: phosphatidate phosphatase PAH1 [Juglans regia]	phosphatidate phosphatase PAH1 {ECO:0000313|RefSeq:XP_018817248.1} OS=Juglans regia (English walnut) Name=LOC108988443 {ECO:0000313|RefSeq:XP_018817248.1} PE=4	Phosphatidate phosphatase PAH1 EC=3.1.3.4 Phosphatidic acid phosphohydrolase 1 Short=AtPAH1 OS=Arabidopsis thaliana (Mouse-ear cress) Name=PAH1 OrderedLocusNames=At3g09560 ORFNames=F11F8.14 PE=1	LNS2 (Lipin/Ned1/Smp2)	[NI] KOG2116 Protein involved in plasmid maintenance/nuclear protein involved in lipid metabolism	N/A	IPR031703; Lipin, middle domain
HLJ_peak_477	477	tig00007008	3157056	3157387	332	*	Cor0002410.1	3.18348	Promoter (1-2kb)	1.32406	3.51997e-13	up	K20523//SH3 domain-containing YSC84-like protein 1	N/A	uncharacterized protein LOC18778426 [Prunus persica]	Uncharacterized protein {ECO:0000313|EMBL:PQP98121.1} OS=Prunus yedoensis var. nudiflora ORFNames=Pyn_29236 {ECO:0000313|EMBL:PQP98121.1} PE=4	N/A	Las17-binding protein actin regulator	[S] KOG1843 Uncharacterized conserved protein	N/A	IPR007461; Ysc84 actin-binding domain
HLJ_peak_489	489	tig00007011	203269	203677	409	*	Cor0034980.1	2.91068	Exon (Cor0034980.1/Cor0034980, exon 6 of 6)	1.46162	4.92251e-96	up	N/A	N/A	hypothetical protein BVC80_1787g12 [Macleaya cordata]	Uncharacterized protein {ECO:0000313|EMBL:SPC94708.1} OS=Fagus sylvatica (Beechnut) ORFNames=FSB_LOCUS22590 {ECO:0000313|EMBL:SPC94708.1} PE=4	N/A	N/A	N/A	N/A	N/A
HLJ_peak_490	490	tig00007011	251155	251508	354	*	Cor0035030.1	4.91534	Promoter (<=1kb)	1.62797	4.58729e-06	up	K16302//metal transporter CNNM	N/A	PREDICTED: DUF21 domain-containing protein At5g52790-like [Juglans regia]	DUF21 domain-containing protein At5g52790-like {ECO:0000313|RefSeq:XP_018838606.1} OS=Juglans regia (English walnut) Name=LOC109004500 {ECO:0000313|RefSeq:XP_018838606.1} PE=4	DUF21 domain-containing protein At5g52790 CBS domain-containing protein CBSDUF5 OS=Arabidopsis thaliana (Mouse-ear cress) Name=CBSDUF5 OrderedLocusNames=At5g52790 ORFNames=F6N7.28 PE=2	Domain of unknown function DUF21	[S] KOG2118 Predicted membrane protein, contains two CBS domains	N/A	IPR002550; Domain of unknown function DUF21
HLJ_peak_499	499	tig00007011	1146784	1147058	275	*	Cor0035780.1	3.09841	Promoter (<=1kb)	1.05213	3.88192e-38	up	K15216//RNA polymerase I-specific transcription initiation factor RRN3	N/A	PREDICTED: RNA polymerase I-specific transcription initiation factor RRN3 [Juglans regia] >XP_018850355.1 PREDICTED: RNA polymerase I-specific transcription initiation factor RRN3 [Juglans regia] >XP_018850356.1 PREDICTED: RNA polymerase I-specific transcription initiation factor RRN3 [Juglans regia]	RNA polymerase I-specific transcription initiation factor RRN3 {ECO:0000313|RefSeq:XP_018850354.1, ECO:0000313|RefSeq:XP_018850355.1, ECO:0000313|RefSeq:XP_018850356.1} OS=Juglans regia (English walnut) ECO:0000313|RefSeq:XP_018850355.1, ECO:0000313|RefSeq:XP_018850356.1} PE=4	N/A	RNA polymerase I specific transcription initiation factor RRN3	[K] KOG2434 RNA polymerase I transcription factor	N/A	IPR007991; RNA polymerase I specific transcription initiation factor RRN3
HLJ_peak_513	513	tig00007011	2872180	2872481	302	*	Cor0037220.1	2.64219	Promoter (<=1kb)	1.29607	8.23049e-35	up	N/A	N/A	PREDICTED: uncharacterized calcium-binding protein At1g02270-like isoform X2 [Juglans regia]	uncharacterized calcium-binding protein At1g02270-like isoform X2 {ECO:0000313|RefSeq:XP_018828162.1} OS=Juglans regia (English walnut) Name=LOC108996622 {ECO:0000313|RefSeq:XP_018828162.1} PE=4	Uncharacterized calcium-binding protein At1g02270 OS=Arabidopsis thaliana (Mouse-ear cress) OrderedLocusNames=At1g02270 ORFNames=T6A9_9, T7I23.22 PE=2	Endonuclease/Exonuclease/phosphatase family	[K] KOG2338 Transcriptional effector CCR4-related protein	N/A	IPR005135; Endonuclease/exonuclease/phosphatase
HLJ_peak_527	527	tig00007013	1111978	1112455	478	*	Cor0130460.1	3.2921	Promoter (2-3kb)	2.54011	2.09481e-88	up	N/A	GO:0007015//biological_process actin filament organization;GO:0051015//molecular_function actin filament binding;GO:0004553//molecular_function hydrolase activity, hydrolyzing O-glycosyl compounds;GO:0005975//biological_process carbohydrate metabolic process	PREDICTED: probable glucan 1,3-beta-glucosidase A [Juglans regia]	probable glucan 1,3-beta-glucosidase A {ECO:0000313|RefSeq:XP_018849649.1} OS=Juglans regia (English walnut) Name=LOC109012460 {ECO:0000313|RefSeq:XP_018849649.1} PE=3	N/A	Cellulase (glycosyl hydrolase family 5)	[X] TWOG0472 Unnamed protein	N/A	IPR010431; Fascin
HLJ_peak_532	532	tig00007015	427076	427481	406	*	Cor0137200.1	4.0605	Promoter (<=1kb)	1.64707	8.1401e-77	up	N/A	N/A	PREDICTED: uncharacterized protein LOC109007525 [Juglans regia]	uncharacterized protein LOC109007525 {ECO:0000313|RefSeq:XP_018842760.1} OS=Juglans regia (English walnut) Name=LOC109007525 {ECO:0000313|RefSeq:XP_018842760.1} PE=4	N/A	N/A	N/A	N/A	N/A
HLJ_peak_552	552	tig00007017	1210480	1210735	256	*	Cor0084540.1	3.91414	Distal Intergenic	2.39131	1.16463e-119	up	N/A	N/A	PREDICTED: F-box/LRR-repeat protein At3g03360-like [Juglans regia]	Uncharacterized protein {ECO:0000313|EMBL:SPD32877.1} OS=Fagus sylvatica (Beechnut) ORFNames=FSB_LOCUS60759 {ECO:0000313|EMBL:SPD32877.1} PE=4	N/A	FBD	N/A	N/A	IPR006566; FBD domain
HLJ_peak_565	565	tig00007031	312699	313113	415	*	Cor0079990.1	3.32927	Promoter (1-2kb)	1.48587	7.05136e-59	up	N/A	GO:0005618//cellular_component cell wall;GO:0030599//molecular_function pectinesterase activity;GO:0042545//biological_process cell wall modification	PREDICTED: probable pectinesterase 67 [Juglans regia]	Pectinesterase {ECO:0000256|RuleBase:RU000589} EC=3.1.1.11 {ECO:0000256|RuleBase:RU000589} OS=Juglans regia (English walnut) Name=LOC108994779 {ECO:0000313|RefSeq:XP_018825658.1} PE=4	Probable pectinesterase 67 Short=PE 67 EC=3.1.1.11 Pectin methylesterase 67 Short=AtPME67 Precursor OS=Arabidopsis thaliana (Mouse-ear cress) ORFNames=K14A17.13, K14A17_18 PE=2	Pectinesterase	[M] LSE0024 A Pectinesterase	N/A	IPR000070; Pectinesterase, catalytic
HLJ_peak_567	567	tig00007031	1058754	1059024	271	*	Cor0080450.1	3.20566	Distal Intergenic	1.01905	0.0119569	up	K00430//peroxidase [EC:1.11.1.7]	GO:0004601//molecular_function peroxidase activity;GO:0006979//biological_process response to oxidative stress;GO:0020037//molecular_function heme binding;GO:0055114//biological_process oxidation-reduction process	PREDICTED: peroxidase 29 [Juglans regia]	Peroxidase {ECO:0000256|RuleBase:RU362060, ECO:0000256|SAAS:SAAS00709852} EC=1.11.1.7 {ECO:0000256|RuleBase:RU362060, ECO:0000256|SAAS:SAAS00709852} OS=Fagus sylvatica (Beechnut) ORFNames=FSB_LOCUS54081 {ECO:0000313|EMBL:SPD26199.1} PE=3	Peroxidase 29 Short=Atperox P29 EC=1.11.1.7 ATP40 Precursor OS=Arabidopsis thaliana (Mouse-ear cress) ORFNames=K14A17.14, K14A17.3 PE=2	Peroxidase	[R] TWOG0189 Peroxidase	N/A	IPR002016; Haem peroxidase, plant/fungal/bacterial
HLJ_peak_568	568	tig00007031	1074084	1074378	295	*	Cor0080460.1	2.81532	Promoter (2-3kb)	1.32965	1.12517e-103	up	N/A	GO:0046983//molecular_function protein dimerization activity	PREDICTED: transcription factor bHLH113-like isoform X1 [Juglans regia]	transcription factor bHLH113-like isoform X1 {ECO:0000313|RefSeq:XP_018852314.1} OS=Juglans regia (English walnut) Name=LOC109014342 {ECO:0000313|RefSeq:XP_018852314.1} PE=4	Transcription factor bHLH153 BHLH transcription factor alpha Short=bHLH alpha {ECO:0000312|EMBL:CAE09167.1} Basic helix-loop-helix protein 153 Short=AtbHLH153 {ECO:0000303|PubMed:14600211} Short=bHLH 153 bHLH transcription factor bHLH153 OS=Arabidopsis thaliana (Mouse-ear cress) ORFNames=F3F20.16 {ECO:0000312|EMBL:AAD30624.1} PE=1	N/A	[KT] LSE0107 A bHLH transcription factor	N/A	IPR011598; Myc-type, basic helix-loop-helix (bHLH) domain
HLJ_peak_579	579	tig00007033	1712401	1712669	269	*	Cor0056870.1	3.63308	Distal Intergenic	1.18564	0.0258853	up	N/A	GO:0005515//molecular_function protein binding	PREDICTED: receptor-like protein 12 [Juglans regia]	receptor-like protein 12 {ECO:0000313|RefSeq:XP_018807212.1} OS=Juglans regia (English walnut) Name=LOC108980663 {ECO:0000313|RefSeq:XP_018807212.1} PE=4	N/A	Leucine rich repeat	N/A	N/A	IPR001611; Leucine-rich repeat
HLJ_peak_601	601	tig00007045	337211	337472	262	*	Cor0180320.1	2.68288	Exon (Cor0180310.1/Cor0180310, exon 17 of 26)	1.67877	2.44682e-10	up	N/A	N/A	PREDICTED: uncharacterized protein LOC108979154 [Juglans regia]	uncharacterized protein LOC108979154 {ECO:0000313|RefSeq:XP_018805297.1} OS=Juglans regia (English walnut) Name=LOC108979154 {ECO:0000313|RefSeq:XP_018805297.1} PE=4	N/A	Protein of unknown function (DUF668)	[X] LSE1328 A Unnamed protein	N/A	IPR021864; Protein of unknown function DUF3475
HLJ_peak_605	605	tig00007051	242702	243138	437	*	Cor0146690.1	3.20566	Promoter (<=1kb)	1.17684	7.72866e-40	up	K17108//non-lysosomal glucosylceramidase [EC:3.2.1.45]	GO:0004553//molecular_function hydrolase activity, hydrolyzing O-glycosyl compounds	PREDICTED: non-lysosomal glucosylceramidase-like isoform X2 [Juglans regia]	Non-lysosomal glucosylceramidase {ECO:0000256|PIRNR:PIRNR028944} Short=NLGase {ECO:0000256|PIRNR:PIRNR028944} EC=3.2.1.45 {ECO:0000256|PIRNR:PIRNR028944} OS=Juglans regia (English walnut) Name=LOC109001413 {ECO:0000313|RefSeq:XP_018834224.1} PE=3	N/A	beta-glucosidase 2, glycosyl-hydrolase family 116 N-term	[G] KOG2119 Predicted bile acid beta-glucosidase	N/A	IPR024462; Glycosyl-hydrolase family 116, N-terminal
HLJ_peak_608	608	tig00007051	402597	403361	765	*	Cor0146870.1	2.77164	Promoter (2-3kb)	2.74974	9.14538e-29	up	K19355//mannan endo-1,4-beta-mannosidase [EC:3.2.1.78]	N/A	hypothetical protein CUMW_198320 [Citrus unshiu]	Uncharacterized protein {ECO:0000313|EMBL:SPD25493.1} OS=Fagus sylvatica (Beechnut) ORFNames=FSB_LOCUS53375 {ECO:0000313|EMBL:SPD25493.1} PE=4	Mannan endo-1,4-beta-mannosidase 2 EC=3.2.1.78 Beta-mannanase 2 Endo-beta-1,4-mannanase 2 LeMAN2 Precursor OS=Solanum lycopersicum (Tomato) (Lycopersicon esculentum) Name=MAN2 PE=2	N/A	[GM] LSE0446 A Cellulase ((1-4)-beta-mannan endohydrolase)	N/A	N/A
HLJ_peak_609	609	tig00007053	102007	102406	400	*	Cor0192060.1	4.0605	Promoter (1-2kb)	1.12231	1.22184e-50	up	N/A	GO:0005515//molecular_function protein binding	F-box/FBD/LRR-repeat protein At1g13570 [Jatropha curcas] >XP_012088118.1 F-box/FBD/LRR-repeat protein At1g13570 [Jatropha curcas] >XP_020540026.1 F-box/FBD/LRR-repeat protein At1g13570 [Jatropha curcas] >XP_020540027.1 F-box/FBD/LRR-repeat protein At1g13570 [Jatropha curcas] >XP_020540028.1 F-box/FBD/LRR-repeat protein At1g13570 [Jatropha curcas]	Uncharacterized protein {ECO:0000313|EMBL:SPD25722.1} OS=Fagus sylvatica (Beechnut) ORFNames=FSB_LOCUS53604 {ECO:0000313|EMBL:SPD25722.1} PE=4	F-box/FBD/LRR-repeat protein At1g13570 OS=Arabidopsis thaliana (Mouse-ear cress) OrderedLocusNames=At1g13570 ORFNames=F13B4.6 PE=2	FBD	[R] LSE0003 A F-box and FBD-domains	N/A	IPR006566; FBD domain
HLJ_peak_614	614	tig00007057	141102	141446	345	*	Cor0052530.1	3.08966	Promoter (<=1kb)	1.68521	1.84444e-49	up	N/A	GO:0004672//molecular_function protein kinase activity;GO:0006468//biological_process protein phosphorylation;GO:0005524//molecular_function ATP binding	PREDICTED: LEAF RUST 10 DISEASE-RESISTANCE LOCUS RECEPTOR-LIKE PROTEIN KINASE-like 1.3 isoform X3 [Juglans regia]	LEAF RUST 10 DISEASE-RESISTANCE LOCUS RECEPTOR-LIKE PROTEIN KINASE-like 1.3 isoform X3 {ECO:0000313|RefSeq:XP_018816647.1} OS=Juglans regia (English walnut) Name=LOC108988017 {ECO:0000313|RefSeq:XP_018816647.1} PE=4	LEAF RUST 10 DISEASE-RESISTANCE LOCUS RECEPTOR-LIKE PROTEIN KINASE-like 1.3 {ECO:0000303|PubMed:12805585} EC=2.7.11.1 Probable receptor-like serine/threonine-protein kinase LRK10L-1.3 {ECO:0000305} Precursor OS=Arabidopsis thaliana (Mouse-ear cress) ORFNames=MXA21.10 {ECO:0000312|EMBL:BAB11288.1} PE=2	Wall-associated receptor kinase C-terminal	[T] KOG1187 Serine/threonine protein kinase	N/A	IPR032872; Wall-associated receptor kinase, C-terminal
HLJ_peak_616	616	tig00007057	479446	479799	354	*	Cor0052940.1	2.93138	Distal Intergenic	4.42901	2.03788e-09	up	N/A	GO:0030001//biological_process metal ion transport;GO:0046872//molecular_function metal ion binding	hypothetical protein CICLE_v10013659mg [Citrus clementina] >XP_006482156.1 PREDICTED: heavy metal-associated isoprenylated plant protein 26 [Citrus sinensis] >ESR43897.1 hypothetical protein CICLE_v10013659mg [Citrus clementina] >KDO36137.1 hypothetical protein CISIN_1g032155mg [Citrus sinensis] >GAY43792.1 hypothetical protein CUMW_077280 [Citrus unshiu]	Uncharacterized protein {ECO:0000313|EMBL:SPD24375.1} OS=Fagus sylvatica (Beechnut) ORFNames=FSB_LOCUS52257 {ECO:0000313|EMBL:SPD24375.1} PE=4	Heavy metal-associated isoprenylated plant protein 21 {ECO:0000303|PubMed:21072340, ECO:0000303|PubMed:23368984} Short=AtHIP21 {ECO:0000303|PubMed:23368984} Short=AtHIPP21 {ECO:0000303|PubMed:21072340, ECO:0000303|PubMed:23368984} Precursor OS=Arabidopsis thaliana (Mouse-ear cress) ORFNames=K3M16_20 {ECO:0000312|EMBL:CAC01889.1} PE=1	Heavy-metal-associated domain	[P] KOG1603 Copper chaperone	N/A	IPR006121; Heavy metal-associated domain, HMA
HLJ_peak_632	632	tig00007057	1941891	1942215	325	*	Cor0054440.1	2.65114	Downstream (1-2kb)	3.44922	5.37361e-07	up	N/A	GO:0016788//molecular_function hydrolase activity, acting on ester bonds	PREDICTED: GDSL esterase/lipase 7-like [Juglans regia]	GDSL esterase/lipase 7-like {ECO:0000313|RefSeq:XP_018806668.1} OS=Juglans regia (English walnut) Name=LOC108980263 {ECO:0000313|RefSeq:XP_018806668.1} PE=3	GDSL esterase/lipase 7 EC=3.1.1.- Extracellular lipase 7 Precursor OS=Arabidopsis thaliana (Mouse-ear cress) Name=GLIP7 OrderedLocusNames=At5g15720 ORFNames=F14F8.100 PE=2	GDSL-like Lipase/Acylhydrolase	[RI] LSE0388 A Predicted lipase	N/A	IPR001087; GDSL lipase/esterase
HLJ_peak_633	633	tig00007057	1993419	1993738	320	*	Cor0054510.1	3.4029	Promoter (2-3kb)	1.83166	1.06399e-76	up	N/A	N/A	PREDICTED: uncharacterized protein At1g04910 [Juglans regia]	uncharacterized protein At1g04910 {ECO:0000313|RefSeq:XP_018816581.1} OS=Juglans regia (English walnut) Name=LOC108987953 {ECO:0000313|RefSeq:XP_018816581.1} PE=4	Rhamnogalacturonan I rhamnosyltransferase 1 {ECO:0000303|PubMed:30082766} EC=2.4.1.351 {ECO:0000269|PubMed:30082766} O-fucosyltransferase 34 {ECO:0000305} Short=O-FucT-34 {ECO:0000305} O-fucosyltransferase family protein {ECO:0000312|EMBL:ARJ31449.1} OS=Arabidopsis thaliana (Mouse-ear cress) ORFNames=F14F8.120 {ECO:0000312|EMBL:CAC01773.1} PE=1	GDP-fucose protein O-fucosyltransferase	[S] LSE0400 A Predicted auxin-independent growth regulator	N/A	IPR019378; GDP-fucose protein O-fucosyltransferase
HLJ_peak_637	637	tig00007057	2247892	2248420	529	*	Cor0054760.1	2.51605	Exon (Cor0054760.1/Cor0054760, exon 2 of 2)	1.10191	3.48032e-62	up	N/A	GO:0043531//molecular_function ADP binding	PREDICTED: putative disease resistance protein At1g50180 [Juglans regia]	putative disease resistance protein At1g50180 {ECO:0000313|RefSeq:XP_018858994.1} OS=Juglans regia (English walnut) Name=LOC109020918 {ECO:0000313|RefSeq:XP_018858994.1} PE=3	Putative disease resistance protein At1g50180 OS=Arabidopsis thaliana (Mouse-ear cress) OrderedLocusNames=At1g50180 ORFNames=F14I3.19 PE=3	NB-ARC domain	[T] KOG4658 Apoptotic ATPase	N/A	IPR002182; NB-ARC
HLJ_peak_638	638	tig00007057	2793921	2794318	398	*	Cor0055000.1	3.75071	Promoter (<=1kb)	1.63389	5.7722e-181	up	N/A	GO:0051513//biological_process regulation of monopolar cell growth	PREDICTED: protein LONGIFOLIA 1-like [Juglans regia]	protein LONGIFOLIA 1-like {ECO:0000313|RefSeq:XP_018816678.1} OS=Juglans regia (English walnut) Name=LOC108988039 {ECO:0000313|RefSeq:XP_018816678.1} PE=4	Protein LONGIFOLIA 1 Protein TON1 RECRUITING MOTIF 2 OS=Arabidopsis thaliana (Mouse-ear cress) ORFNames=T20K14.190 PE=1	Domain of unknown function (DUF4378)	[X] LSE1460 A Unnamed protein	N/A	IPR033334; Protein LONGIFOLIA 1/2
HLJ_peak_644	644	tig00007059	629536	629807	272	*	Cor0092760.1	2.93518	Promoter (1-2kb)	2.73446	4.0404e-115	up	K09422//myb proto-oncogene protein, plant	N/A	PREDICTED: myb-related protein 306-like [Juglans regia]	Uncharacterized protein {ECO:0000313|EMBL:SPC94657.1} OS=Fagus sylvatica (Beechnut) ORFNames=FSB_LOCUS22539 {ECO:0000313|EMBL:SPC94657.1} PE=4	Myb-related protein 306 OS=Antirrhinum majus (Garden snapdragon) Name=MYB306 {ECO:0000303|PubMed:1840903} PE=2	Myb-like DNA-binding domain	[K] KOG0048 Transcription factor, Myb superfamily	http://plntfdb.bio.uni-potsdam.de/v3.0/fam_mem.php?family_id=MYB-related	IPR017930; Myb domain
HLJ_peak_651	651	tig00007059	1148796	1149116	321	*	Cor0093250.1	3.23925	Distal Intergenic	2.45103	0	up	N/A	N/A	PREDICTED: uncharacterized protein LOC108992770 [Juglans regia]	Uncharacterized protein {ECO:0000313|EMBL:SPD22239.1} OS=Fagus sylvatica (Beechnut) ORFNames=FSB_LOCUS50121 {ECO:0000313|EMBL:SPD22239.1} PE=4	N/A	Domain of unknown function (DUF569)	[X] LSE1344 A Unnamed protein	N/A	IPR007679; Domain of unknown function DUF569
HLJ_peak_652	652	tig00007059	1256399	1256814	416	*	Cor0093390.1	3.1135	Promoter (1-2kb)	1.00632	0.000135998	up	N/A	N/A	PREDICTED: CLAVATA3/ESR (CLE)-related protein 25-like [Juglans regia]	CLAVATA3/ESR (CLE)-related protein 25-like {ECO:0000313|RefSeq:XP_018844785.1} OS=Juglans regia (English walnut) Name=LOC109008937 {ECO:0000313|RefSeq:XP_018844785.1} PE=4	CLAVATA3/ESR (CLE)-related protein 25 CLE25p Precursor OS=Arabidopsis thaliana (Mouse-ear cress) Name=CLE25 OrderedLocusNames=At3g28455 ORFNames=MFJ20 PE=2	N/A	N/A	N/A	N/A
HLJ_peak_654	654	tig00007059	1343740	1344092	353	*	Cor0093500.1	3.06877	Promoter (<=1kb)	1.4133	2.93026e-104	up	K11644//paired amphipathic helix protein Sin3a	N/A	PREDICTED: paired amphipathic helix protein Sin3-like 2 [Juglans regia] >XP_018844791.1 PREDICTED: paired amphipathic helix protein Sin3-like 2 [Juglans regia]	paired amphipathic helix protein Sin3-like 2 {ECO:0000313|RefSeq:XP_018844790.1, ECO:0000313|RefSeq:XP_018844791.1} OS=Juglans regia (English walnut) ECO:0000313|RefSeq:XP_018844791.1} PE=4	Paired amphipathic helix protein Sin3-like 2 OS=Arabidopsis thaliana (Mouse-ear cress) Name=SNL2 OrderedLocusNames=At5g15020 ORFNames=F2G14.140 PE=1	C-terminal domain of Sin3a protein	[B] KOG4204 Histone deacetylase complex, SIN3 component	N/A	IPR031693; Sin3, C-terminal
HLJ_peak_658	658	tig00007059	1692557	1692807	251	*	Cor0093940.1	3.92618	Promoter (1-2kb)	1.89097	0	up	K00128//aldehyde dehydrogenase (NAD+) [EC:1.2.1.3]	GO:0008152//biological_process metabolic process;GO:0016491//molecular_function oxidoreductase activity;GO:0055114//biological_process oxidation-reduction process	PREDICTED: aldehyde dehydrogenase family 2 member B7, mitochondrial-like [Nelumbo nucifera]	Uncharacterized protein {ECO:0000313|EMBL:SPD20054.1} OS=Fagus sylvatica (Beechnut) ORFNames=FSB_LOCUS47936 {ECO:0000313|EMBL:SPD20054.1} PE=3	Aldehyde dehydrogenase family 2 member B7, mitochondrial Short=ALDH2b EC=1.2.1.3 Precursor OS=Arabidopsis thaliana (Mouse-ear cress) ORFNames=F5O8.33, F5O8.35 PE=1	Aldehyde dehydrogenase family	[C] KOG2450 Aldehyde dehydrogenase	N/A	IPR015590; Aldehyde dehydrogenase domain
HLJ_peak_662	662	tig00007059	2072314	2072789	476	*	Cor0094410.1	2.71089	Promoter (<=1kb)	7.24929	2.98279e-46	up	K09422//myb proto-oncogene protein, plant	N/A	PREDICTED: transcription factor MYB98-like [Juglans regia]	Uncharacterized protein {ECO:0000313|EMBL:SPD17138.1} OS=Fagus sylvatica (Beechnut) ORFNames=FSB_LOCUS45020 {ECO:0000313|EMBL:SPD17138.1} PE=4	Transcription factor MYB98 {ECO:0000303|PubMed:11597504} Myb-related protein 98 {ECO:0000303|PubMed:11597504} Short=AtMYB98 {ECO:0000303|PubMed:11597504} OS=Arabidopsis thaliana (Mouse-ear cress) ORFNames=F28A21.180 {ECO:0000312|EMBL:CAB37462.1} PE=2	Myb-like DNA-binding domain	[K] KOG0048 Transcription factor, Myb superfamily	http://plntfdb.bio.uni-potsdam.de/v3.0/fam_mem.php?family_id=MYB-related	IPR017930; Myb domain
HLJ_peak_668	668	tig00007061	84065	84316	252	*	Cor0149050.1	3.95677	Promoter (2-3kb)	2.15151	0.00189107	up	#N/A	#N/A	#N/A	#N/A	#N/A	#N/A	#N/A	#N/A	#N/A
HLJ_peak_685	685	tig00007062	51677	51932	256	*	Cor0198990.1	2.99194	Intron (Cor0199000.1/Cor0199000, intron 2 of 6)	1.05355	1.61712e-20	up	N/A	N/A	PREDICTED: uncharacterized protein LOC109005639 isoform X1 [Juglans regia] >XP_018853121.1 PREDICTED: uncharacterized protein LOC109015095 isoform X2 [Juglans regia]	uncharacterized protein LOC109005639 isoform X1 {ECO:0000313|RefSeq:XP_018840194.1} uncharacterized protein LOC109015095 isoform X2 {ECO:0000313|RefSeq:XP_018853121.1} OS=Juglans regia (English walnut) Synonyms=LOC109005639 {ECO:0000313|RefSeq:XP_018840194.1} PE=4	N/A	N/A	N/A	N/A	N/A
HLJ_peak_690	690	tig00007062	174545	174798	254	*	Cor0199180.1	2.63468	Promoter (<=1kb)	2.30342	2.44444e-14	up	K15400//omega-hydroxypalmitate O-feruloyl transferase [EC:2.3.1.188]	GO:0016747//molecular_function transferase activity, transferring acyl groups other than amino-acyl groups	PREDICTED: omega-hydroxypalmitate O-feruloyl transferase-like [Juglans regia]	omega-hydroxypalmitate O-feruloyl transferase-like {ECO:0000313|RefSeq:XP_018812107.1} OS=Juglans regia (English walnut) Name=LOC108984559 {ECO:0000313|RefSeq:XP_018812107.1} PE=4	Omega-hydroxypalmitate O-feruloyl transferase EC=2.3.1.188 Omega-hydroxyacid hydroxycinnamoyltransferase Protein ALIPHATIC SUBERIN FERULOYL TRANSFERASE OS=Arabidopsis thaliana (Mouse-ear cress) ORFNames=MEE6.11 PE=1	Transferase family	[RQ] LSE0273 A Predicted N-hydroxycinnamoyl/benzoyltransferase	N/A	IPR003480; Transferase
HLJ_peak_693	693	tig00007062	286230	286562	333	*	Cor0199320.1	2.99194	Promoter (1-2kb)	1.30128	0.0111169	up	N/A	GO:0016747//molecular_function transferase activity, transferring acyl groups other than amino-acyl groups	PREDICTED: acyltransferase-like protein At3g26840, chloroplastic isoform X1 [Juglans regia]	acyltransferase-like protein At3g26840, chloroplastic isoform X1 {ECO:0000313|RefSeq:XP_018834083.1} OS=Juglans regia (English walnut) Name=LOC109001310 {ECO:0000313|RefSeq:XP_018834083.1} PE=4	Acyltransferase-like protein At3g26840, chloroplastic EC=2.3.1.- Precursor OS=Arabidopsis thaliana (Mouse-ear cress) OrderedLocusNames=At3g26840 ORFNames=MDJ14.16 PE=1	Alpha/beta hydrolase family	[IR] LSE0188 A Predicted phosphate acyltransferase, contains PlsC domain	N/A	IPR007130; Diacylglycerol acyltransferase
HLJ_peak_703	703	tig00007070	938896	939156	261	*	Cor0102820.1	3.32203	Promoter (1-2kb)	1.98686	4.58864e-113	up	N/A	GO:0005515//molecular_function protein binding	PREDICTED: BTB/POZ domain-containing protein At2g30600 isoform X1 [Juglans regia] >XP_018836407.1 PREDICTED: BTB/POZ domain-containing protein At2g30600 isoform X1 [Juglans regia]	BTB/POZ domain-containing protein At2g30600 isoform X1 {ECO:0000313|RefSeq:XP_018836406.1, ECO:0000313|RefSeq:XP_018836407.1} OS=Juglans regia (English walnut) ECO:0000313|RefSeq:XP_018836407.1} PE=4	BTB/POZ domain-containing protein At2g30600 OS=Arabidopsis thaliana (Mouse-ear cress) OrderedLocusNames=At2g30600/At2g30610 ORFNames=T6B20.5/T6B20.4 PE=2	BTB/POZ domain	[TR] KOG4441 Proteins containing BTB/POZ and Kelch domains, involved in regulatory/signal transduction processes	N/A	IPR022041; Farnesoic acid O-methyl transferase
HLJ_peak_712	712	tig00007070	2044215	2044491	277	*	Cor0104070.1	3.20566	Promoter (1-2kb)	2.60154	8.30051e-72	up	K04730//interleukin-1 receptor-associated kinase 1 [EC:2.7.11.1]	GO:0004672//molecular_function protein kinase activity;GO:0005524//molecular_function ATP binding;GO:0006468//biological_process protein phosphorylation	PREDICTED: probable receptor-like protein kinase At3g17420 [Juglans regia]	probable receptor-like protein kinase At3g17420 {ECO:0000313|RefSeq:XP_018846822.1} OS=Juglans regia (English walnut) Name=LOC109010438 {ECO:0000313|RefSeq:XP_018846822.1} PE=4	Proline-rich receptor-like protein kinase PERK14 EC=2.7.11.1 Proline-rich extensin-like receptor kinase 14 Short=AtPERK14 OS=Arabidopsis thaliana (Mouse-ear cress) Name=PERK14 OrderedLocusNames=At4g32710 ORFNames=F4D11.90 PE=2	Protein kinase domain	[T] KOG1187 Serine/threonine protein kinase	N/A	IPR000719; Protein kinase domain
HLJ_peak_717	717	tig00007074	105995	106246	252	*	Cor0109510.1	2.92073	Promoter (1-2kb)	1.18605	7.6598e-33	up	N/A	GO:0005525//molecular_function GTP binding	PREDICTED: probable GTP-binding protein OBGC2 isoform X2 [Juglans regia]	Uncharacterized protein {ECO:0000313|EMBL:SPD23495.1} OS=Fagus sylvatica (Beechnut) ORFNames=FSB_LOCUS51377 {ECO:0000313|EMBL:SPD23495.1} PE=4	Probable GTP-binding protein OBGC2 OS=Oryza sativa subsp. japonica (Rice) ORFNames=OSJNBa0052F07.17 PE=2	50S ribosome-binding GTPase	[R] KOG1489 Predicted GTP-binding protein (ODN superfamily)	N/A	IPR031167; OBG-type guanine nucleotide-binding (G) domain
HLJ_peak_722	722	tig00007074	661901	662238	338	*	Cor0110070.1	3.3052	Downstream (<1kb)	1.23948	7.23803e-170	up	K14484//auxin-responsive protein IAA	GO:0005634//cellular_component nucleus;GO:0006355//biological_process regulation of transcription, DNA-templated;GO:0005515//molecular_function protein binding	PREDICTED: auxin-responsive protein IAA9-like [Juglans regia]	Auxin-responsive protein {ECO:0000256|RuleBase:RU004549} OS=Betula platyphylla (Asian white birch) PE=2	Auxin-responsive protein IAA9 Indoleacetic acid-induced protein 9 OS=Arabidopsis thaliana (Mouse-ear cress) Name=IAA9 OrderedLocusNames=At5g65670 ORFNames=F6H11.210, MPA24.1 PE=1	AUX/IAA family	[TR] LSE0302 A Auxin-inducible protein	N/A	IPR033389; AUX/IAA domain
HLJ_peak_723	723	tig00007074	1058081	1058504	424	*	Cor0110390.1	3.41937	Distal Intergenic	3.67274	2.66769e-70	up	N/A	N/A	PREDICTED: UDP-glycosyltransferase 91C1 [Juglans regia]	UDP-glycosyltransferase 91C1 {ECO:0000313|RefSeq:XP_018859286.1} OS=Juglans regia (English walnut) Name=LOC109021168 {ECO:0000313|RefSeq:XP_018859286.1} PE=4	UDP-glycosyltransferase 91C1 EC=2.4.1.- OS=Arabidopsis thaliana (Mouse-ear cress) Name=UGT91C1 OrderedLocusNames=At5g49690 ORFNames=K2I5.5 PE=2	N/A	[GC] KOG1192 UDP-glucuronosyl and UDP-glucosyl transferase	N/A	N/A
HLJ_peak_729	729	tig00007074	1668607	1669151	545	*	Cor0110990.1	3.20566	Promoter (2-3kb)	4.83543	4.94935e-45	up	N/A	GO:0005576//cellular_component extracellular region;GO:0008083//molecular_function growth factor activity;GO:0008283//biological_process cell proliferation	PREDICTED: phytosulfokines-like [Juglans regia]	Uncharacterized protein {ECO:0000313|EMBL:SPC76177.1} OS=Fagus sylvatica (Beechnut) ORFNames=FSB_LOCUS4059 {ECO:0000313|EMBL:SPC76177.1} PE=4	Phytosulfokines Phytosulfokine-alpha Short=PSK-alpha Short=Phytosulfokine-a Phytosulfokine-beta Short=PSK-beta Short=Phytosulfokine-b Precursor OS=Asparagus officinalis (Garden asparagus) Name=PSK PE=1	Phytosulfokine precursor protein (PSK)	[X] LSE1300 A Unnamed protein	N/A	IPR009438; Phytosulfokine
HLJ_peak_731	731	tig00007075	110416	110847	432	*	Cor0208590.1	3.00502	Intron (Cor0208590.1/Cor0208590, intron 5 of 7)	1.35314	3.81886e-150	up	N/A	GO:0016020//cellular_component membrane	PREDICTED: CSC1-like protein RXW8 isoform X1 [Juglans regia]	CSC1-like protein RXW8 isoform X2 {ECO:0000313|RefSeq:XP_018851113.1} OS=Juglans regia (English walnut) Name=LOC109013470 {ECO:0000313|RefSeq:XP_018851113.1} PE=4	CSC1-like protein RXW8 OS=Arabidopsis thaliana (Mouse-ear cress) Name=RXW8 OrderedLocusNames=At1g58520 ORFNames=R18I, X7J PE=2	Calcium-dependent channel, 7TM region, putative phosphate	[R] KOG1134 Uncharacterized conserved protein	N/A	IPR032880; Calcium permeable stress-gated cation channel 1, N-terminal transmembrane domain
HLJ_peak_739	739	tig00007076	1160885	1161164	280	*	Cor0091430.1	3.89427	Promoter (<=1kb)	1.50112	8.05248e-200	up	N/A	GO:0005515//molecular_function protein binding	ankyrin repeat-containing protein BDA1-like [Carica papaya]	Putative ankyrin repeat-containing domain, PGG domain-containing protein {ECO:0000313|EMBL:PRQ59718.1} OS=Rosa chinensis (China rose) ORFNames=RchiOBHm_Chr1g0373281 {ECO:0000313|EMBL:PRQ59718.1} PE=4	N/A	Domain of unknown function	[R] KOG0504 FOG: Ankyrin repeat	N/A	IPR026961; PGG domain
HLJ_peak_745	745	tig00007080	485076	485342	267	*	Cor0127820.1	3.20566	Intron (Cor0127810.1/Cor0127810, intron 6 of 11)	1.28599	3.55141e-99	up	N/A	GO:0016020//cellular_component membrane;GO:0048193//biological_process Golgi vesicle transport	PREDICTED: uncharacterized protein LOC108998864 isoform X1 [Juglans regia]	Uncharacterized protein {ECO:0000313|EMBL:SPC73118.1} OS=Fagus sylvatica (Beechnut) ORFNames=FSB_LOCUS1000 {ECO:0000313|EMBL:SPC73118.1} PE=4	N/A	Syntaxin 6, N-terminal	[X] LSE1641 A Unnamed protein	N/A	IPR015260; Syntaxin 6, N-terminal
HLJ_peak_759	759	tig00007094	744934	745181	248	*	Cor0051830.1	2.40404	Exon (Cor0051840.1/Cor0051840, exon 3 of 4)	3.03603	7.22593e-13	up	N/A	GO:0016021//cellular_component integral component of membrane;GO:0022857//molecular_function transmembrane transporter activity;GO:0055085//biological_process transmembrane transport;GO:0016020//cellular_component membrane	PREDICTED: sugar transport protein 5-like [Juglans regia]	Uncharacterized protein {ECO:0000313|EMBL:SPD13178.1} OS=Fagus sylvatica (Beechnut) ORFNames=FSB_LOCUS41060 {ECO:0000313|EMBL:SPD13178.1} PE=3	Sugar transport protein 5 Hexose transporter 5 OS=Arabidopsis thaliana (Mouse-ear cress) Name=STP5 OrderedLocusNames=At1g34580 ORFNames=F12K21.8 PE=2	Sugar (and other) transporter	[R] KOG0254 Predicted transporter (major facilitator superfamily)	N/A	IPR020846; Major facilitator superfamily domain
HLJ_peak_769	769	tig00007103	1801826	1802072	247	*	Cor0027430.1	4.48792	Distal Intergenic	1.56987	3.37985e-144	up	N/A	GO:0016021//cellular_component integral component of membrane	PREDICTED: uncharacterized protein LOC109012254 [Juglans regia]	uncharacterized protein LOC109012254 {ECO:0000313|RefSeq:XP_018849334.1} OS=Juglans regia (English walnut) Name=LOC109012254 {ECO:0000313|RefSeq:XP_018849334.1} PE=4	Sulfite exporter TauE/SafE family protein 3 {ECO:0000312|EMBL:AEC07746.1} OS=Arabidopsis thaliana (Mouse-ear cress) F3N11 {ECO:0000312|EMBL:AAM15102.1} PE=2	Sulfite exporter TauE/SafE	[X] LSE1257 A Unnamed protein	N/A	IPR002781; Transmembrane protein TauE-like
HLJ_peak_779	779	tig00007103	4615568	4615880	313	*	Cor0028440.1	2.6581	Promoter (<=1kb)	4.12439	0.000220408	up	N/A	GO:0005452//molecular_function inorganic anion exchanger activity;GO:0006820//biological_process anion transport;GO:0016020//cellular_component membrane;GO:0016021//cellular_component integral component of membrane	PREDICTED: boron transporter 4-like [Juglans regia] >XP_018827362.1 PREDICTED: boron transporter 4-like [Juglans regia] >XP_018827363.1 PREDICTED: boron transporter 4-like [Juglans regia] >XP_018827364.1 PREDICTED: boron transporter 4-like [Juglans regia] >XP_018827365.1 PREDICTED: boron transporter 4-like [Juglans regia] >XP_018827366.1 PREDICTED: boron transporter 4-like [Juglans regia] >XP_018…	Uncharacterized protein {ECO:0000313|EMBL:SPC93546.1} OS=Fagus sylvatica (Beechnut) ORFNames=FSB_LOCUS21428 {ECO:0000313|EMBL:SPC93546.1} PE=4	Boron transporter 4 OS=Arabidopsis thaliana (Mouse-ear cress) Name=BOR4 OrderedLocusNames=At1g15460 ORFNames=F9L1.41 PE=2	HCO3- transporter family	[P] KOG1172 Na+-independent Cl/HCO3 exchanger AE1 and related transporters (SLC4 family)	N/A	IPR011531; Bicarbonate transporter, C-terminal
HLJ_peak_782	782	tig00007105	256352	256822	471	*	Cor0098180.1	3.61409	Distal Intergenic	1.25472	7.82902e-78	up	N/A	N/A	PREDICTED: uncharacterized protein LOC108984534 [Juglans regia]	uncharacterized protein LOC108984534 {ECO:0000313|RefSeq:XP_018812068.1} OS=Juglans regia (English walnut) Name=LOC108984534 {ECO:0000313|RefSeq:XP_018812068.1} PE=4	N/A	Glyoxalase/Bleomycin resistance protein/Dioxygenase superfamily	[G] LSE0294 A Predicted glyoxylase	N/A	IPR037523; Vicinal oxygen chelate (VOC) domain
HLJ_peak_785	785	tig00007105	1272708	1273089	382	*	Cor0098760.1	4.74297	Distal Intergenic	1.24053	8.27362e-62	up	K00864//glycerol kinase [EC:2.7.1.30]	GO:0005975//biological_process carbohydrate metabolic process;GO:0016773//molecular_function phosphotransferase activity, alcohol group as acceptor	PREDICTED: glycerol kinase [Juglans regia]	glycerol kinase {ECO:0000313|RefSeq:XP_018806799.1} OS=Juglans regia (English walnut) Name=LOC108980358 {ECO:0000313|RefSeq:XP_018806799.1} PE=4	Glycerol kinase Short=Glycerokinase EC=2.7.1.30 ATP:glycerol 3-phosphotransferase Protein GLYCEROL INSENSITIVE 1 Protein NONHOST RESISTANCE TO P. S. PHASEOLICOLA 1 OS=Arabidopsis thaliana (Mouse-ear cress) ORFNames=T21F11.21 PE=1	FGGY family of carbohydrate kinases, C-terminal domain	[G] KOG2517 Ribulose kinase and related carbohydrate kinases	N/A	IPR018485; Carbohydrate kinase, FGGY, C-terminal
HLJ_peak_786	786	tig00007105	1386219	1386482	264	*	Cor0098840.1	3.31178	Exon (Cor0098830.1/Cor0098830, exon 10 of 10)	2.43334	0	up	N/A	GO:0005515//molecular_function protein binding	PREDICTED: F-box/LRR-repeat protein 20 [Cucumis melo] >XP_008461147.1 PREDICTED: F-box/LRR-repeat protein 20 [Cucumis melo] >XP_008461148.1 PREDICTED: F-box/LRR-repeat protein 20 [Cucumis melo]	F-box/LRR-repeat protein 20 {ECO:0000313|RefSeq:XP_008461146.1, ECO:0000313|RefSeq:XP_008461147.1, ECO:0000313|RefSeq:XP_008461148.1} OS=Cucumis melo (Muskmelon) ECO:0000313|RefSeq:XP_008461147.1, ECO:0000313|RefSeq:XP_008461148.1} PE=4	N/A	Leucine Rich repeat	[R] KOG1947 Leucine rich repeat proteins, some proteins contain F-box	N/A	IPR006553; Leucine-rich repeat, cysteine-containing subtype
HLJ_peak_787	787	tig00007105	1735405	1735726	322	*	Cor0099010.1	3.06877	Exon (Cor0099000.1/Cor0099000, exon 12 of 12)	1.36988	0.0100439	up	K07192//flotillin	N/A	flotillin-like protein 3 [Spinacia oleracea]	Uncharacterized protein {ECO:0000313|EMBL:KNA19275.1} OS=Spinacia oleracea (Spinach) ORFNames=SOVF_063020 {ECO:0000313|EMBL:KNA19275.1} PE=4	Flotillin-like protein 6 OS=Medicago truncatula (Barrel medic) (Medicago tribuloides) Name=FLOT6 PE=2	SPFH domain / Band 7 family	[UZ] KOG2668 Flotillins	N/A	IPR027705; Flotillin family
HLJ_peak_788	788	tig00007107	49823	50202	380	*	Cor0151710.1	3.20566	Exon (Cor0151720.1/Cor0151720, exon 32 of 32)	4.66313	5.17129e-263	up	N/A	GO:0008080//molecular_function N-acetyltransferase activity	PREDICTED: probable N-acetyltransferase HLS1 isoform X1 [Juglans regia]	probable N-acetyltransferase HLS1 isoform X1 {ECO:0000313|RefSeq:XP_018847551.1} OS=Juglans regia (English walnut) Name=LOC109010999 {ECO:0000313|RefSeq:XP_018847551.1} PE=4	Probable N-acetyltransferase HLS1 EC=2.3.1.- Protein CONSTITUTIVE PHOTOMORPHOGENIC 3 Protein HOOKLESS 1 Protein UNUSUAL SUGAR RESPONSE 2 OS=Arabidopsis thaliana (Mouse-ear cress) ORFNames=F19F18.70 PE=1	Acetyltransferase (GNAT) family	[X] LSE1422 A Predicted N-acyltransferase	N/A	IPR000182; GNAT domain
HLJ_peak_796	796	tig00007109	731689	732068	380	*	Cor0143630.1	3.63308	Distal Intergenic	3.35373	8.41895e-08	up	N/A	N/A	PREDICTED: LOB domain-containing protein 19-like [Juglans regia]	LOB domain-containing protein 19-like {ECO:0000313|RefSeq:XP_018846679.1} OS=Juglans regia (English walnut) Name=LOC109010337 {ECO:0000313|RefSeq:XP_018846679.1} PE=4	LOB domain-containing protein 31 ASYMMETRIC LEAVES 2-like protein 22 Short=AS2-like protein 22 OS=Arabidopsis thaliana (Mouse-ear cress) ORFNames=F6N15.25 PE=2	Lateral organ boundaries (LOB) domain	[R] LSE0040 A Lateral organ boundaries domain (LOB)	http://plntfdb.bio.uni-potsdam.de/v3.0/fam_mem.php?family_id=LOB	IPR004883; Lateral organ boundaries, LOB
HLJ_peak_807	807	tig00007111	830036	830579	544	*	Cor0017750.1	3.82824	Promoter (<=1kb)	1.56497	7.21586e-08	up	N/A	N/A	PREDICTED: uncharacterized protein LOC109020628 isoform X1 [Juglans regia]	Uncharacterized protein {ECO:0000313|EMBL:SPD24471.1} OS=Fagus sylvatica (Beechnut) ORFNames=FSB_LOCUS52353 {ECO:0000313|EMBL:SPD24471.1} PE=4	N/A	N/A	N/A	N/A	N/A
HLJ_peak_818	818	tig00007111	3657814	3658273	460	*	Cor0020040.1	3.84679	Exon (Cor0020050.1/Cor0020050, exon 7 of 8)	1.41517	3.53095e-131	up	N/A	N/A	PREDICTED: uncharacterized protein At2g39920 isoform X1 [Juglans regia]	uncharacterized protein At2g39920 isoform X2 {ECO:0000313|RefSeq:XP_018821686.1} OS=Juglans regia (English walnut) Name=LOC108991755 {ECO:0000313|RefSeq:XP_018821686.1} PE=4	Uncharacterized protein At2g39920 OS=Arabidopsis thaliana (Mouse-ear cress) OrderedLocusNames=At2g39920 ORFNames=T28M21.8 PE=2	HAD superfamily, subfamily IIIB (Acid phosphatase)	[R] LSE0440 A Predicted acid phosphatase/vegetative storage protein-like	N/A	IPR005519; Acid phosphatase, class B-like
HLJ_peak_827	827	tig00007111	5045808	5046081	274	*	Cor0021770.1	3.74449	Promoter (<=1kb)	1.11156	2.71103e-40	up	K08869//aarF domain-containing kinase	N/A	PREDICTED: uncharacterized aarF domain-containing protein kinase At5g05200, chloroplastic isoform X2 [Juglans regia]	uncharacterized aarF domain-containing protein kinase At5g05200, chloroplastic isoform X2 {ECO:0000313|RefSeq:XP_018833506.1} OS=Juglans regia (English walnut) Name=LOC109000911 {ECO:0000313|RefSeq:XP_018833506.1} PE=4	Uncharacterized aarF domain-containing protein kinase At5g05200, chloroplastic EC=2.7.-.- Precursor OS=Arabidopsis thaliana (Mouse-ear cress) OrderedLocusNames=At5g05200 ORFNames=K2A11.7 PE=1	ABC1 family	[R] KOG1235 Predicted unusual protein kinase	N/A	IPR004147; UbiB domain
HLJ_peak_829	829	tig00007112	147715	148045	331	*	Cor0007390.1	3.63535	Exon (Cor0007400.1/Cor0007400, exon 5 of 6)	4.49961	0.00117754	up	K09286//EREBP-like factor	GO:0003700//molecular_function DNA-binding transcription factor activity;GO:0006355//biological_process regulation of transcription, DNA-templated	PREDICTED: ethylene-responsive transcription factor LEP-like [Juglans regia]	ethylene-responsive transcription factor LEP-like {ECO:0000313|RefSeq:XP_018829151.1} OS=Juglans regia (English walnut) Name=LOC108997377 {ECO:0000313|RefSeq:XP_018829151.1} PE=4	Ethylene-responsive transcription factor ERF087 OS=Arabidopsis thaliana (Mouse-ear cress) Name=ERF087 OrderedLocusNames=At1g28160 ORFNames=F13K9.25, F3H9.18 PE=2	AP2 domain	[K] LSE0301 A AP2 domain transcription factor	http://plntfdb.bio.uni-potsdam.de/v3.0/fam_mem.php?family_id=AP2-EREBP	IPR001471; AP2/ERF domain
HLJ_peak_833	833	tig00007112	1013333	1013752	420	*	Cor0008420.1	3.23342	Promoter (1-2kb)	2.5904	6.02831e-208	up	N/A	N/A	PREDICTED: REF/SRPP-like protein At1g67360 isoform X2 [Juglans regia] >XP_018806821.1 PREDICTED: REF/SRPP-like protein At1g67360 [Juglans regia]	REF/SRPP-like protein At1g67360 {ECO:0000313|RefSeq:XP_018806821.1} REF/SRPP-like protein At1g67360 isoform X2 {ECO:0000313|RefSeq:XP_018845967.1} OS=Juglans regia (English walnut) Synonyms=LOC108980374 {ECO:0000313|RefSeq:XP_018806821.1} PE=4	REF/SRPP-like protein At1g67360 OS=Arabidopsis thaliana (Mouse-ear cress) OrderedLocusNames=At1g67360 ORFNames=F1N21.18 PE=2	Rubber elongation factor protein (REF)	[X] LSE1615 A Unnamed protein	N/A	IPR008802; Rubber elongation factor
HLJ_peak_860	860	tig00007112	4133881	4134136	256	*	Cor0012080.1	3.41937	Distal Intergenic	1.3983	5.15927e-143	up	K04733//interleukin-1 receptor-associated kinase 4 [EC:2.7.11.1]	GO:0004672//molecular_function protein kinase activity;GO:0006468//biological_process protein phosphorylation;GO:0005524//molecular_function ATP binding	PREDICTED: protein kinase 2B, chloroplastic-like [Juglans regia]	protein kinase 2B, chloroplastic-like {ECO:0000313|RefSeq:XP_018817692.1} OS=Juglans regia (English walnut) Name=LOC108988787 {ECO:0000313|RefSeq:XP_018817692.1} PE=3	Probable serine/threonine-protein kinase PBL3 {ECO:0000305} EC=2.7.11.1 {ECO:0000305} PBS1-like protein 3 {ECO:0000303|PubMed:20413097} Protein kinase 2B {ECO:0000305} OS=Arabidopsis thaliana (Mouse-ear cress) ORFNames=T20F6.6 PE=1	Protein tyrosine kinase	[T] KOG1187 Serine/threonine protein kinase	N/A	IPR001245; Serine-threonine/tyrosine-protein kinase, catalytic domain
HLJ_peak_866	866	tig00007112	4461876	4462447	572	*	Cor0012460.1	3.66295	Promoter (<=1kb)	3.03744	1.78032e-47	up	K01166//ribonuclease T2 [EC:3.1.27.1]	GO:0003723//molecular_function RNA binding;GO:0033897//molecular_function ribonuclease T2 activity	Ribonuclease T2-like protein [Corchorus capsularis]	Ribonuclease 3 {ECO:0000313|EMBL:RDX92838.1} OS=Mucuna pruriens (Velvet bean) (Dolichos pruriens) ORFNames=CR513_24982 {ECO:0000313|EMBL:RDX92838.1} PE=3	Ribonuclease 1 EC=4.6.1.19 Precursor OS=Arabidopsis thaliana (Mouse-ear cress) Name=RNS1 OrderedLocusNames=At2g02990 ORFNames=T17M13.16 PE=1	Ribonuclease T2 family	[A] KOG1642 Ribonuclease, T2 family	N/A	IPR001568; Ribonuclease T2-like
HLJ_peak_873	873	tig00007112	5224088	5224365	278	*	Cor0013490.1	2.76974	Promoter (<=1kb)	2.63351	9.03555e-160	up	N/A	GO:0003676//molecular_function nucleic acid binding	PREDICTED: ras GTPase-activating protein-binding protein 2-like isoform X1 [Ziziphus jujuba]	Uncharacterized protein {ECO:0000313|EMBL:SPC78481.1} OS=Fagus sylvatica (Beechnut) ORFNames=FSB_LOCUS6363 {ECO:0000313|EMBL:SPC78481.1} PE=4	N/A	Nuclear transport factor 2 (NTF2) domain	[T] KOG0116 RasGAP SH3 binding protein rasputin, contains NTF2 and RRM domains	N/A	IPR018222; Nuclear transport factor 2, eukaryote
HLJ_peak_875	875	tig00007112	5742981	5743267	287	*	Cor0013990.1	2.78733	Promoter (1-2kb)	3.62395	1.21617e-29	up	N/A	N/A	PREDICTED: uncharacterized protein LOC108984475 [Juglans regia]	uncharacterized protein LOC108984475 {ECO:0000313|RefSeq:XP_018811993.1} OS=Juglans regia (English walnut) Name=LOC108984475 {ECO:0000313|RefSeq:XP_018811993.1} PE=4	N/A	AhpC/TSA antioxidant enzyme	N/A	N/A	IPR032801; Peroxiredoxin-like FAM213/AAED1
HLJ_peak_887	887	tig00007120	564443	564716	274	*	Cor0121700.1	3.02981	Promoter (1-2kb)	1.3079	3.20865e-125	up	N/A	GO:0004553//molecular_function hydrolase activity, hydrolyzing O-glycosyl compounds;GO:0005975//biological_process carbohydrate metabolic process;GO:0030246//molecular_function carbohydrate binding	hypothetical protein CICLE_v10004268mg [Citrus clementina] >ESR34187.1 hypothetical protein CICLE_v10004268mg [Citrus clementina]	Beta-galactosidase {ECO:0000256|RuleBase:RU000675} EC=3.2.1.23 {ECO:0000256|RuleBase:RU000675} OS=Citrus clementina ORFNames=CICLE_v10004268mg {ECO:0000313|EMBL:ESR34187.1} PE=3	Beta-galactosidase 9 Short=Lactase 9 EC=3.2.1.23 Precursor OS=Arabidopsis thaliana (Mouse-ear cress) Name=BGAL9 OrderedLocusNames=At2g32810 ORFNames=F24L7.5 PE=2	Galactose binding lectin domain	[G] KOG0496 Beta-galactosidase	N/A	IPR031330; Glycoside hydrolase 35, catalytic domain
HLJ_peak_894	894	tig00007120	831915	832234	320	*	Cor0121930.1	3.88999	Promoter (2-3kb)	3.38129	0	up	N/A	GO:0046872//molecular_function metal ion binding	PREDICTED: metallothionein-like protein type 2 [Juglans regia]	metallothionein-like protein type 2 {ECO:0000313|RefSeq:XP_018823221.1} OS=Juglans regia (English walnut) Name=LOC108992951 {ECO:0000313|RefSeq:XP_018823221.1} PE=4	Metallothionein-like protein type 2 OS=Actinidia deliciosa (Kiwi) ORFNames=pKIWI504 PE=2	Metallothionein	N/A	N/A	IPR000347; Metallothionein, family 15, plant
HLJ_peak_895	895	tig00007120	1016052	1016358	307	*	Cor0122130.1	2.99019	Intron (Cor0122120.1/Cor0122120, intron 7 of 7)	6.51609	1.98223e-25	up	N/A	GO:0005618//cellular_component cell wall;GO:0030599//molecular_function pectinesterase activity;GO:0042545//biological_process cell wall modification	PREDICTED: probable pectinesterase 29 [Juglans regia]	Pectinesterase {ECO:0000256|RuleBase:RU000589} EC=3.1.1.11 {ECO:0000256|RuleBase:RU000589} OS=Juglans regia (English walnut) Name=LOC109003419 {ECO:0000313|RefSeq:XP_018837075.1} PE=4	Probable pectinesterase 29 Short=PE 29 EC=3.1.1.11 Pectin methylesterase 29 Short=AtPME29 Precursor OS=Arabidopsis thaliana (Mouse-ear cress) ORFNames=MUJ8.16 PE=2	Pectinesterase	[M] LSE0024 A Pectinesterase	N/A	IPR000070; Pectinesterase, catalytic
HLJ_peak_909	909	tig00007130	40060	40339	280	*	Cor0140290.1	3.58023	Distal Intergenic	2.06791	1.88211e-233	up	N/A	GO:0003677//molecular_function DNA binding;GO:0006368//biological_process transcription elongation from RNA polymerase II promoter;GO:0016570//biological_process histone modification;GO:0016593//cellular_component Cdc73/Paf1 complex;GO:0003676//molecular_function nucleic acid binding;GO:0008270//molecular_function zinc ion binding	PREDICTED: uncharacterized protein LOC108985527 isoform X3 [Juglans regia]	uncharacterized protein LOC108985527 isoform X3 {ECO:0000313|RefSeq:XP_018813412.1} OS=Juglans regia (English walnut) Name=LOC108985527 {ECO:0000313|RefSeq:XP_018813412.1} PE=4	N/A	Plus-3 domain	N/A	N/A	IPR031102; RNA polymerase-associated protein Rtf1
HLJ_peak_918	918	tig00007134	161716	162015	300	*	Cor0182630.1	3.70411	Exon (Cor0182630.1/Cor0182630, exon 3 of 3)	1.24561	1.68052e-67	up	N/A	GO:0005515//molecular_function protein binding	PREDICTED: ankyrin repeat-containing protein At5g02620 [Juglans regia] >XP_018839350.1 PREDICTED: ankyrin repeat-containing protein At5g02620 [Juglans regia] >XP_018839351.1 PREDICTED: ankyrin repeat-containing protein At5g02620 [Juglans regia]	ankyrin repeat-containing protein At5g02620 {ECO:0000313|RefSeq:XP_018839349.1, ECO:0000313|RefSeq:XP_018839350.1, ECO:0000313|RefSeq:XP_018839351.1} OS=Juglans regia (English walnut) ECO:0000313|RefSeq:XP_018839350.1, ECO:0000313|RefSeq:XP_018839351.1} PE=4	Ankyrin repeat-containing protein At5g02620 OS=Arabidopsis thaliana (Mouse-ear cress) OrderedLocusNames=At5g02620 ORFNames=T22P11.210 PE=1	Ankyrin repeats (many copies)	[R] KOG0504 FOG: Ankyrin repeat	N/A	IPR026961; PGG domain
HLJ_peak_926	926	tig00007137	2551391	2551677	287	*	Cor0070840.1	2.86946	Promoter (<=1kb)	4.87573	0.00175785	up	N/A	GO:0005524//molecular_function ATP binding;GO:0016887//molecular_function ATPase activity;GO:0016020//cellular_component membrane;GO:0016021//cellular_component integral component of membrane;GO:0042626//molecular_function ATPase activity, coupled to transmembrane movement of substances;GO:0055085//biological_process transmembrane transport	PREDICTED: ABC transporter G family member 10 [Vitis vinifera]	Uncharacterized protein {ECO:0000313|EMBL:SPD31619.1} OS=Fagus sylvatica (Beechnut) ORFNames=FSB_LOCUS59501 {ECO:0000313|EMBL:SPD31619.1} PE=4	ABC transporter G family member 10 Short=ABC transporter ABCG.10 Short=AtABCG10 Probable white-brown complex homolog protein 10 Short=AtWBC10 OS=Arabidopsis thaliana (Mouse-ear cress) ORFNames=F12M16.17 PE=3	CDR ABC transporter	[Q] KOG0061 Transporter, ABC superfamily (Breast cancer resistance protein)	N/A	IPR013525; ABC-2 type transporter
HLJ_peak_934	934	tig00007145	1644578	1644892	315	*	Cor0109220.1	2.99194	Intron (Cor0109220.1/Cor0109220, intron 10 of 22)	1.7129	1.93056e-64	up	K16900//two pore calcium channel protein, plant	GO:0005216//molecular_function ion channel activity;GO:0006811//biological_process ion transport;GO:0016020//cellular_component membrane;GO:0055085//biological_process transmembrane transport;GO:0005509//molecular_function calcium ion binding;GO:0005245//molecular_function voltage-gated calcium channel activity	PREDICTED: two pore calcium channel protein 1B-like isoform X2 [Juglans regia]	two pore calcium channel protein 1B-like isoform X2 {ECO:0000313|RefSeq:XP_018838254.1} OS=Juglans regia (English walnut) Name=LOC109004223 {ECO:0000313|RefSeq:XP_018838254.1} PE=4	Two pore calcium channel protein 1A Voltage-dependent calcium channel protein TPC1A Short=NtTPC1A OS=Nicotiana tabacum (Common tobacco) Name=TPC1A PE=2	EF-hand domain pair	[PT] KOG2301 Voltage-gated Ca2+ channels, alpha1 subunits	N/A	IPR028801; Two pore calcium channel protein 1
HLJ_peak_939	939	tig00007149	1166820	1167107	288	*	Cor0083230.1	3.20566	Promoter (2-3kb)	6.05908	1.11291e-170	up	N/A	GO:0003677//molecular_function DNA binding;GO:0046983//molecular_function protein dimerization activity	agamous-like MADS-box protein AGL104 [Sesamum indicum]	Agamous-like MADS-box protein {ECO:0000313|EMBL:PSS16029.1} OS=Actinidia chinensis var. chinensis ORFNames=CEY00_Acc13528 {ECO:0000313|EMBL:PSS16029.1} PE=4	MADS-box transcription factor 50 Short=OsMADS50 Protein AGAMOUS-like 20 Protein SUPPRESSOR OF CONSTANS OVEREXPRESSION 1-like Short=OsSOC1 RMADS208 OS=Oryza sativa subsp. japonica (Rice) OrderedLocusNames=Os03g0122600, LOC_Os03g03070 ORFNames=OJ1126B12.8 PE=2	SRF-type transcription factor (DNA-binding and dimerisation domain)	[K] KOG0014 MADS box transcription factor	http://plntfdb.bio.uni-potsdam.de/v3.0/fam_mem.php?family_id=MADS	IPR002100; Transcription factor, MADS-box
HLJ_peak_940	940	tig00007149	1174799	1175268	470	*	Cor0083250.1	2.98567	Promoter (1-2kb)	3.18897	0	up	N/A	GO:0000272//biological_process polysaccharide catabolic process;GO:0016161//molecular_function beta-amylase activity	PREDICTED: beta-amylase-like [Juglans regia]	Beta-amylase {ECO:0000256|RuleBase:RU000509} EC=3.2.1.2 {ECO:0000256|RuleBase:RU000509} OS=Juglans regia (English walnut) Name=LOC109010151 {ECO:0000313|RefSeq:XP_018846417.1} PE=3	Beta-amylase EC=3.2.1.2 1,4-alpha-D-glucan maltohydrolase OS=Trifolium repens (Creeping white clover) Name=BMY1 PE=2	Glycosyl hydrolase family 14	[G] LSE0409 A Beta-amylase	N/A	IPR001554; Glycoside hydrolase, family 14
HLJ_peak_954	954	tig00007160	451745	452015	271	*	Cor0160270.1	2.8736	Exon (Cor0160270.1/Cor0160270, exon 8 of 8)	2.14333	7.62594e-112	up	K20102//YTH domain-containing family protein	GO:0003723//molecular_function RNA binding	PREDICTED: uncharacterized protein LOC108979355 isoform X1 [Juglans regia] >XP_018805565.1 PREDICTED: uncharacterized protein LOC108979355 isoform X1 [Juglans regia]	uncharacterized protein LOC108979355 isoform X1 {ECO:0000313|RefSeq:XP_018805564.1, ECO:0000313|RefSeq:XP_018805565.1} OS=Juglans regia (English walnut) ECO:0000313|RefSeq:XP_018805565.1} PE=4	YTH domain-containing protein ECT4 {ECO:0000305} Protein EVOLUTIONARILY CONSERVED C-TERMINAL REGION 4 {ECO:0000303|PubMed:29643069} OS=Arabidopsis thaliana (Mouse-ear cress) ORFNames=T5A14.10 {ECO:0000312|EMBL:AAD10646.1} PE=2	YT521-B-like domain	[R] KOG1901 Uncharacterized high-glucose-regulated protein	N/A	IPR007275; YTH domain
HLJ_peak_963	963	tig00007163	865216	865503	288	*	Cor0076120.1	3.46855	Promoter (<=1kb)	2.20029	1.06604e-53	up	N/A	N/A	PREDICTED: random slug protein 5 [Juglans regia] >XP_018826503.1 PREDICTED: random slug protein 5 [Juglans regia]	random slug protein 5 {ECO:0000313|RefSeq:XP_018826502.1, ECO:0000313|RefSeq:XP_018826503.1} OS=Juglans regia (English walnut) ECO:0000313|RefSeq:XP_018826503.1} PE=4	N/A	CRAL/TRIO domain	[I] KOG1470 Phosphatidylinositol transfer protein PDR16 and related proteins	N/A	IPR011074; CRAL/TRIO, N-terminal domain
HLJ_peak_968	968	tig00007163	1328957	1329226	270	*	Cor0076650.1	4.07792	Downstream (1-2kb)	1.0431	1.7085e-105	up	N/A	N/A	PREDICTED: BTB/POZ domain-containing protein At3g50780-like [Juglans regia] >XP_018830222.1 PREDICTED: BTB/POZ domain-containing protein At3g50780-like [Juglans regia] >XP_018830223.1 PREDICTED: BTB/POZ domain-containing protein At3g50780-like [Juglans regia] >XP_018830224.1 PREDICTED: BTB/POZ domain-containing protein At3g50780-like [Juglans regia]	BTB/POZ domain-containing protein At3g50780-like {ECO:0000313|RefSeq:XP_018830221.1, ECO:0000313|RefSeq:XP_018830222.1, ECO:0000313|RefSeq:XP_018830223.1} OS=Juglans regia (English walnut) ECO:0000313|RefSeq:XP_018830224.1} PE=4	BTB/POZ domain-containing protein At3g50780 OS=Arabidopsis thaliana (Mouse-ear cress) OrderedLocusNames=At3g50780 ORFNames=F18B3.60 PE=2	N/A	[X] LSE1345 A Unnamed protein	N/A	N/A
HLJ_peak_974	974	tig00007163	1891440	1891697	258	*	Cor0077390.1	2.55142	Promoter (1-2kb)	5.4389	8.97279e-32	up	K15277//solute carrier family 35 (adenosine 3'-phospho 5'-phosphosulfate transporter), member B3	GO:0055085//biological_process transmembrane transport	PREDICTED: UDP-galactose/UDP-glucose transporter 4-like isoform X1 [Juglans regia]	UDP-galactose/UDP-glucose transporter 4-like isoform X1 {ECO:0000313|RefSeq:XP_018830254.1} OS=Juglans regia (English walnut) Name=LOC108998210 {ECO:0000313|RefSeq:XP_018830254.1} PE=4	UDP-galactose/UDP-glucose transporter 2 {ECO:0000303|PubMed:12042319} Short=AtUTr2 {ECO:0000303|PubMed:12042319} OS=Arabidopsis thaliana (Mouse-ear cress) ORFNames=F7H19.200 {ECO:0000312|EMBL:CAA19817.1} PE=2	UAA transporter family	[G] KOG1582 UDP-galactose transporter related protein	N/A	IPR013657; UAA transporter
HLJ_peak_978	978	tig00007165	96969	97323	355	*	Cor0060390.1	4.33069	Distal Intergenic	1.38518	2.32375e-101	up	K12347//natural resistance-associated macrophage protein 1	GO:0016020//cellular_component membrane;GO:0030001//biological_process metal ion transport;GO:0046873//molecular_function metal ion transmembrane transporter activity	PREDICTED: metal transporter Nramp3-like [Juglans regia]	metal transporter Nramp3-like {ECO:0000313|RefSeq:XP_018851669.1} OS=Juglans regia (English walnut) Name=LOC109013884 {ECO:0000313|RefSeq:XP_018851669.1} PE=3	Metal transporter Nramp3 Short=AtNramp3 OS=Arabidopsis thaliana (Mouse-ear cress) Name=NRAMP3 OrderedLocusNames=At2g23150 ORFNames=F21P24.21 PE=1	Natural resistance-associated macrophage protein	[P] KOG1291 Mn2+ and Fe2+ transporters of the NRAMP family	N/A	IPR001046; NRAMP family
HLJ_peak_987	987	tig00007165	1132034	1132483	450	*	Cor0061460.1	3.6443	Promoter (1-2kb)	1.68075	3.19294e-88	up	N/A	N/A	PREDICTED: probable disease resistance protein At5g66900 [Juglans regia] >XP_018806550.1 PREDICTED: probable disease resistance protein At5g66900 [Juglans regia]	probable disease resistance protein At5g66900 {ECO:0000313|RefSeq:XP_018806549.1, ECO:0000313|RefSeq:XP_018806550.1} OS=Juglans regia (English walnut) ECO:0000313|RefSeq:XP_018806550.1} PE=3	Probable disease resistance protein At5g66910 OS=Arabidopsis thaliana (Mouse-ear cress) OrderedLocusNames=At5g66910 ORFNames=MUD21.17 PE=2	N/A	[T] LSE0012 A Apoptotic ATPase, disease resistance determinant	N/A	N/A
HLJ_peak_1000	1000	tig00007167	403986	404363	378	*	Cor0156870.1	2.94798	Downstream (<1kb)	1.64374	4.98592e-233	up	N/A	N/A	PREDICTED: uncharacterized protein LOC109010373 isoform X1 [Juglans regia] >XP_018846735.1 PREDICTED: uncharacterized protein LOC109010373 isoform X1 [Juglans regia] >XP_018846737.1 PREDICTED: uncharacterized protein LOC109010373 isoform X1 [Juglans regia] >XP_018846738.1 PREDICTED: uncharacterized protein LOC109010373 isoform X1 [Juglans regia]	Uncharacterized protein {ECO:0000313|EMBL:SPD24957.1} OS=Fagus sylvatica (Beechnut) ORFNames=FSB_LOCUS52839 {ECO:0000313|EMBL:SPD24957.1} PE=4	N/A	N/A	[X] LSE2153 A Unnamed protein	N/A	N/A
HLJ_peak_1005	1005	tig00007167	751631	751917	287	*	Cor0157210.1	2.75742	Promoter (<=1kb)	3.75137	6.34417e-54	up	K14488//SAUR family protein	GO:0009733//biological_process response to auxin	auxin-responsive family protein [Populus trichocarpa]	Small auxin-up RNA {ECO:0000313|EMBL:PON97554.1} OS=Trema orientale (Charcoal tree) (Celtis orientalis) ORFNames=TorRG33x02_067560 {ECO:0000313|EMBL:PON97554.1} PE=4	Auxin-responsive protein SAUR32 {ECO:0000305} Protein ABOLISHED APICAL HOOK MAINTENANCE 1 {ECO:0000303|Ref.6} Protein SMALL AUXIN UP RNA 32 {ECO:0000303|PubMed:12036261} OS=Arabidopsis thaliana (Mouse-ear cress) OrderedLocusNames=At2g46690 {ECO:0000312|Araport:AT2G46690} PE=2	Auxin responsive protein	[RT] LSE0432 A Auxin responsive protein	N/A	IPR003676; Small auxin-up RNA
HLJ_peak_1011	1011	tig00007169	1110189	1110444	256	*	Cor0046990.1	3.41937	Promoter (1-2kb)	11.0871	1.1024e-111	up	#N/A	#N/A	#N/A	#N/A	#N/A	#N/A	#N/A	#N/A	#N/A
HLJ_peak_1017	1017	tig00007169	1598154	1598505	352	*	Cor0047340.1	3.56279	Promoter (2-3kb)	1.07006	1.04396e-35	up	K00850//6-phosphofructokinase 1 [EC:2.7.1.11]	GO:0003872//molecular_function 6-phosphofructokinase activity;GO:0006002//biological_process fructose 6-phosphate metabolic process;GO:0006096//biological_process glycolytic process	PREDICTED: ATP-dependent 6-phosphofructokinase 6-like [Juglans regia]	ATP-dependent 6-phosphofructokinase {ECO:0000256|HAMAP-Rule:MF_03186} Short=ATP-PFK {ECO:0000256|HAMAP-Rule:MF_03186} Short=Phosphofructokinase {ECO:0000256|HAMAP-Rule:MF_03186} EC=2.7.1.11 {ECO:0000256|HAMAP-Rule:MF_03186} Phosphohexokinase {ECO:0000256|HAMAP-Rule:MF_03186} OS=Juglans regia (English walnut) Synonyms=PFK {ECO:0000256|HAMAP-Rule:MF_03186} PE=3	ATP-dependent 6-phosphofructokinase 3 {ECO:0000255|HAMAP-Rule:MF_03186} Short=ATP-PFK 3 {ECO:0000255|HAMAP-Rule:MF_03186} Short=Phosphofructokinase 3 {ECO:0000255|HAMAP-Rule:MF_03186} EC=2.7.1.11 {ECO:0000255|HAMAP-Rule:MF_03186} Phosphohexokinase 3 {ECO:0000255|HAMAP-Rule:MF_03186} OS=Arabidopsis thaliana (Mouse-ear cress) OrderedLocusNames=At4g26270 ORFNames=T25K17.80 PE=1	Phosphofructokinase	[G] KOG2440 Pyrophosphate-dependent phosphofructo-1-kinase	N/A	IPR022953; ATP-dependent 6-phosphofructokinase
HLJ_peak_1021	1021	tig00007169	2686000	2686366	367	*	Cor0047780.1	3.78817	Downstream (1-2kb)	1.69497	2.65697e-118	up	N/A	GO:0005524//molecular_function ATP binding;GO:0016021//cellular_component integral component of membrane;GO:0042626//molecular_function ATPase activity, coupled to transmembrane movement of substances;GO:0055085//biological_process transmembrane transport;GO:0016887//molecular_function ATPase activity	PREDICTED: ABC transporter C family member 8-like [Juglans regia]	ABC transporter C family member 8-like {ECO:0000313|RefSeq:XP_018821014.1} OS=Juglans regia (English walnut) Name=LOC108991293 {ECO:0000313|RefSeq:XP_018821014.1} PE=4	ABC transporter C family member 8 Short=ABC transporter ABCC.8 Short=AtABCC8 EC=7.6.2.2 ATP-energized glutathione S-conjugate pump 6 Glutathione S-conjugate-transporting ATPase 6 Multidrug resistance-associated protein 6 Precursor OS=Arabidopsis thaliana (Mouse-ear cress) ORFNames=MXL8.11 PE=2	ABC transporter	[Q] KOG0054 Multidrug resistance-associated protein/mitoxantrone resistance protein, ABC superfamily	N/A	IPR011527; ABC transporter type 1, transmembrane domain
HLJ_peak_1034	1034	tig00007177	802712	803265	554	*	Cor0124530.1	2.89828	Promoter (<=1kb)	3.19367	0.00012886	up	K15813//beta-amyrin synthase [EC:5.4.99.39]	N/A	putative oxidosqualene cyclase [Betula platyphylla]	Uncharacterized protein {ECO:0000313|EMBL:SPC82181.1} OS=Fagus sylvatica (Beechnut) ORFNames=FSB_LOCUS10063 {ECO:0000313|EMBL:SPC82181.1} PE=4	Beta-Amyrin Synthase 2 EC=5.4.99.39 OS=Panax ginseng (Korean ginseng) Name=OSCPNY2 PE=2	Squalene-hopene cyclase C-terminal domain	[I] KOG0497 Oxidosqualene-lanosterol cyclase and related proteins	N/A	IPR032696; Squalene cyclase, C-terminal
HLJ_peak_1036	1036	tig00007182	158759	159214	456	*	Cor0144470.1	3.45035	Exon (Cor0144470.1/Cor0144470, exon 11 of 12)	1.02699	1.29883e-59	up	N/A	N/A	PREDICTED: uncharacterized protein LOC109002863 [Juglans regia]	uncharacterized protein LOC109002863 {ECO:0000313|RefSeq:XP_018836325.1} OS=Juglans regia (English walnut) Name=LOC109002863 {ECO:0000313|RefSeq:XP_018836325.1} PE=4	N/A	Plant protein of unknown function (DUF639)	[X] LSE1307 A Unnamed protein	N/A	IPR006927; Protein of unknown function DUF639
HLJ_peak_1037	1037	tig00007182	269140	269501	362	*	Cor0144600.1	2.54168	Promoter (1-2kb)	1.16275	1.7416e-13	up	N/A	N/A	PREDICTED: GEM-like protein 4 [Juglans regia]	Uncharacterized protein {ECO:0000313|EMBL:SPC99231.1} OS=Fagus sylvatica (Beechnut) ORFNames=FSB_LOCUS27113 {ECO:0000313|EMBL:SPC99231.1} PE=4	GEM-like protein 4 OS=Arabidopsis thaliana (Mouse-ear cress) OrderedLocusNames=At5g08350 ORFNames=F8L15_80 PE=2	GRAM domain	[RT] LSE0436 A Abscisic acid-responsive protein, contains GRAM domain	N/A	IPR004182; GRAM domain
HLJ_peak_1044	1044	tig00007184	41589	41842	254	*	Cor0070930.1	2.89306	Downstream (<1kb)	1.00924	5.4168e-38	up	K14499//BRI1 kinase inhibitor 1	N/A	PREDICTED: BRI1 kinase inhibitor 1-like [Juglans regia] >XP_018816090.1 PREDICTED: BRI1 kinase inhibitor 1-like [Juglans regia] >XP_018853451.1 PREDICTED: BRI1 kinase inhibitor 1-like [Juglans regia]	BRI1 kinase inhibitor 1-like {ECO:0000313|RefSeq:XP_018816090.1, ECO:0000313|RefSeq:XP_018853245.1, ECO:0000313|RefSeq:XP_018853451.1} OS=Juglans regia (English walnut) LOC109015437 {ECO:0000313|RefSeq:XP_018853451.1} PE=4	BRI1 kinase inhibitor 1 OS=Arabidopsis thaliana (Mouse-ear cress) Name=BKI1 OrderedLocusNames=At5g42750 ORFNames=MJB21.13 PE=1	N/A	[X] LSE1420 A Unnamed protein	N/A	N/A
HLJ_peak_1050	1050	tig00007184	1135484	1135760	277	*	Cor0072090.1	4.27421	Distal Intergenic	2.25363	1.58329e-08	up	N/A	N/A	hypothetical protein POPTR_005G184100v3 [Populus trichocarpa]	Uncharacterized protein {ECO:0000313|EMBL:PNT37360.1} OS=Populus trichocarpa (Western balsam poplar) (Populus balsamifera subsp. trichocarpa) ORFNames=POPTR_005G184100 {ECO:0000313|EMBL:PNT37360.1} PE=4	N/A	N/A	N/A	N/A	N/A
HLJ_peak_1081	1081	tig00007203	1267057	1267421	365	*	Cor0132810.1	3.66295	Exon (Cor0132810.1/Cor0132810, exon 4 of 9)	1.08228	2.85557e-30	up	N/A	GO:0003723//molecular_function RNA binding	PREDICTED: CRM-domain containing factor CFM3, chloroplastic/mitochondrial [Juglans regia]	CRM-domain containing factor CFM3, chloroplastic/mitochondrial {ECO:0000313|RefSeq:XP_018826209.1} OS=Juglans regia (English walnut) Name=LOC108995165 {ECO:0000313|RefSeq:XP_018826209.1} PE=4	CRM-domain containing factor CFM3, chloroplastic/mitochondrial {ECO:0000305} Protein CRM FAMILY MEMBER 3 {ECO:0000303|PubMed:18799595} Short=ZmCFM3 {ECO:0000303|PubMed:18799595} Precursor OS=Zea mays (Maize) Name=CFM3 {ECO:0000303|PubMed:18799595} PE=1	CRS1 / YhbY (CRM) domain	[L] KOG1990 Poly(A)-specific exoribonuclease PARN	N/A	IPR001890; RNA-binding, CRM domain
HLJ_peak_1089	1089	tig00007207	228594	228957	364	*	Cor0200000.1	2.88637	Promoter (<=1kb)	3.06274	2.01778e-69	up	K05658//ATP-binding cassette, subfamily B (MDR/TAP), member 1 [EC:3.6.3.44]	GO:0005524//molecular_function ATP binding;GO:0016887//molecular_function ATPase activity	PREDICTED: putative ABC transporter B family member 8 [Juglans regia]	putative ABC transporter B family member 8 {ECO:0000313|RefSeq:XP_018853248.1} OS=Juglans regia (English walnut) Name=LOC109015224 {ECO:0000313|RefSeq:XP_018853248.1} PE=4	Putative ABC transporter B family member 8 Short=ABC transporter ABCB.8 Short=AtABCB8 P-glycoprotein 8 Putative multidrug resistance protein 22 OS=Arabidopsis thaliana (Mouse-ear cress) ORFNames=MJI6.16 PE=5	ABC transporter	[Q] KOG0055 Multidrug/pheromone exporter, ABC superfamily	N/A	IPR003593; AAA+ ATPase domain
HLJ_peak_1098	1098	tig00007211	865626	866020	395	*	Cor0116870.1	3.41011	Promoter (1-2kb)	1.80748	2.07283e-42	up	N/A	GO:0016020//cellular_component membrane	PREDICTED: probable serine incorporator isoform X1 [Juglans regia]	probable serine incorporator isoform X1 {ECO:0000313|RefSeq:XP_018822826.1} OS=Juglans regia (English walnut) Name=LOC108992671 {ECO:0000313|RefSeq:XP_018822826.1} PE=4	N/A	Serine incorporator (Serinc)	[S] KOG2592 Tumor differentially expressed (TDE) protein	N/A	IPR005016; Serine incorporator/TMS membrane protein
HLJ_peak_1100	1100	tig00007211	895831	896118	288	*	Cor0116900.1	2.87393	Promoter (<=1kb)	3.30498	2.25135e-32	up	N/A	GO:0030001//biological_process metal ion transport;GO:0046872//molecular_function metal ion binding	PREDICTED: uncharacterized protein LOC107431855 [Ziziphus jujuba]	Uncharacterized protein {ECO:0000313|EMBL:SPD05779.1} OS=Fagus sylvatica (Beechnut) ORFNames=FSB_LOCUS33661 {ECO:0000313|EMBL:SPD05779.1} PE=4	Protein SODIUM POTASSIUM ROOT DEFECTIVE 2 {ECO:0000303|PubMed:21193571} Short=NaKR2 {ECO:0000303|PubMed:21193571} Heavy metal-associated plant protein 3 {ECO:0000303|PubMed:23368984} Short=AtHPP03 {ECO:0000303|PubMed:23368984} OS=Arabidopsis thaliana (Mouse-ear cress) ORFNames=F3G5.18 {ECO:0000312|EMBL:AAC98058.1} PE=2	Heavy-metal-associated domain	[P] KOG1603 Copper chaperone	N/A	IPR006121; Heavy metal-associated domain, HMA
HLJ_peak_1106	1106	tig00007214	74593	74932	340	*	Cor0206110.1	4.35245	Exon (Cor0206110.1/Cor0206110, exon 3 of 10)	3.44722	8.72703e-07	up	K15281//solute carrier family 35	N/A	PREDICTED: UDP-sugar transporter sqv-7-like [Juglans regia]	UDP-sugar transporter sqv-7-like {ECO:0000313|RefSeq:XP_018836648.1} OS=Juglans regia (English walnut) Name=LOC109003108 {ECO:0000313|RefSeq:XP_018836648.1} PE=4	UDP-N-acetylglucosamine transporter UGNT1 {ECO:0000305} Short=UDP-GlcNAc transporter 1 {ECO:0000303|PubMed:30224661} Nucleotide-sugar uncharacterized transporter 3 {ECO:0000305} OS=Arabidopsis thaliana (Mouse-ear cress) ORFNames=F10M6.90 {ECO:0000312|EMBL:CAA16963.1} PE=1	Triose-phosphate Transporter family	[GOU] KOG1444 Nucleotide-sugar transporter VRG4/SQV-7	N/A	IPR004853; Sugar phosphate transporter domain
HLJ_peak_1110	1110	tig00007215	517631	517940	310	*	Cor0101100.1	4.0605	Distal Intergenic	1.22515	4.35151e-05	up	K15289//solute carrier family 35, member F5	GO:0016020//cellular_component membrane;GO:0016021//cellular_component integral component of membrane	PREDICTED: thiamine-repressible mitochondrial transport protein THI74-like isoform X1 [Juglans regia]	thiamine-repressible mitochondrial transport protein THI74-like isoform X1 {ECO:0000313|RefSeq:XP_018826802.1} OS=Juglans regia (English walnut) Name=LOC108995660 {ECO:0000313|RefSeq:XP_018826802.1} PE=4	N/A	EamA-like transporter family	[S] KOG2765 Predicted membrane protein	N/A	IPR000620; EamA domain
HLJ_peak_1128	1128	tig00007230	445735	446035	301	*	Cor0150640.1	3.63308	Exon (Cor0150630.1/Cor0150630, exon 16 of 16)	1.11277	2.46643e-70	up	N/A	GO:0005515//molecular_function protein binding	PREDICTED: outer envelope protein 61 [Juglans regia]	outer envelope protein 61 {ECO:0000313|RefSeq:XP_018851837.1} OS=Juglans regia (English walnut) Name=LOC109013997 {ECO:0000313|RefSeq:XP_018851837.1} PE=4	Outer envelope protein 61 Tetratricopeptide repeat domain-containing protein 7 OS=Arabidopsis thaliana (Mouse-ear cress) ORFNames=T6G21.100 PE=1	Tetratricopeptide repeat	[O] KOG0543 FKBP-type peptidyl-prolyl cis-trans isomerase	N/A	IPR023566; Peptidyl-prolyl cis-trans isomerase, FKBP-type
HLJ_peak_1134	1134	tig00007242	451973	452513	541	*	Cor0058560.1	2.5376	Promoter (1-2kb)	1.83304	5.12961e-268	up	K12251//N-carbamoylputrescine amidase [EC:3.5.1.53]	GO:0006807//biological_process nitrogen compound metabolic process;GO:0016810//molecular_function hydrolase activity, acting on carbon-nitrogen (but not peptide) bonds	PREDICTED: N-carbamoylputrescine amidase-like [Juglans regia] >XP_018831264.1 PREDICTED: N-carbamoylputrescine amidase-like [Juglans regia]	N-carbamoylputrescine amidase-like {ECO:0000313|RefSeq:XP_018831263.1, ECO:0000313|RefSeq:XP_018831264.1} OS=Juglans regia (English walnut) ECO:0000313|RefSeq:XP_018831264.1} PE=4	N-carbamoylputrescine amidase EC=3.5.1.53 OS=Solanum tuberosum (Potato) Name=CPA PE=2	Carbon-nitrogen hydrolase	[E] KOG0806 Carbon-nitrogen hydrolase	N/A	IPR003010; Carbon-nitrogen hydrolase
HLJ_peak_1147	1147	tig00007242	2639520	2639777	258	*	Cor0060240.1	2.93036	Distal Intergenic	1.41304	3.53686e-21	up	N/A	GO:0005524//molecular_function ATP binding;GO:0016887//molecular_function ATPase activity;GO:0016020//cellular_component membrane	PREDICTED: ABC transporter G family member 15-like [Juglans regia]	ABC transporter G family member 15-like {ECO:0000313|RefSeq:XP_018839738.1} OS=Juglans regia (English walnut) Name=LOC109005324 {ECO:0000313|RefSeq:XP_018839738.1} PE=4	ABC transporter G family member 15 Short=ABC transporter ABCG.15 Short=AtABCG15 White-brown complex homolog protein 15 Short=AtWBC15 White-brown complex homolog protein 22 Short=AtWBC22 OS=Arabidopsis thaliana (Mouse-ear cress) ORFNames=MSA6.13 PE=2	ABC-2 type transporter	[Q] KOG0061 Transporter, ABC superfamily (Breast cancer resistance protein)	N/A	IPR013525; ABC-2 type transporter
HLJ_peak_1150	1150	tig00007244	341585	341883	299	*	Cor0106340.1	2.41274	Exon (Cor0106340.1/Cor0106340, exon 6 of 7)	2.06141	2.45502e-134	up	K19045//E3 ubiquitin-protein ligase BIG BROTHER and related proteins [EC:2.3.2.27]	N/A	E3 ubiquitin ligase BIG BROTHER isoform X1 [Carica papaya]	43kDa postsynaptic protein {ECO:0000313|EMBL:PON89212.1} OS=Trema orientale (Charcoal tree) (Celtis orientalis) ORFNames=TorRG33x02_150750 {ECO:0000313|EMBL:PON89212.1} PE=4	E3 ubiquitin-protein ligase BIG BROTHER EC=2.3.2.27 {ECO:0000269|PubMed:16461280, ECO:0000269|PubMed:18483219} Protein ENHANCER OF DA1-1 RING-type E3 ubiquitin transferase BIG BROTHER {ECO:0000305} OS=Arabidopsis thaliana (Mouse-ear cress) Name=BB Synonyms=EOD1 OrderedLocusNames=At3g63530 ORFNames=TEL3S.1 PE=1	Ring finger domain	[O] KOG0800 FOG: Predicted E3 ubiquitin ligase	N/A	IPR001841; Zinc finger, RING-type
HLJ_peak_1151	1151	tig00007244	653770	654020	251	*	Cor0106490.1	3.46208	Promoter (<=1kb)	5.62731	0.0089318	up	K09285//AP2-like factor, ANT lineage	GO:0003700//molecular_function DNA-binding transcription factor activity;GO:0006355//biological_process regulation of transcription, DNA-templated;GO:0007275//biological_process multicellular organism development	PREDICTED: AP2-like ethylene-responsive transcription factor PLT1 [Populus euphratica]	Uncharacterized protein {ECO:0000313|EMBL:PNT46682.2} OS=Populus trichocarpa (Western balsam poplar) (Populus balsamifera subsp. trichocarpa) ORFNames=POPTR_003G205700 {ECO:0000313|EMBL:PNT46682.2} PE=4	AP2-like ethylene-responsive transcription factor PLT2 Protein AINTEGUMENTA-LIKE 4 Protein PLETHORA 2 OS=Arabidopsis thaliana (Mouse-ear cress) ORFNames=F11M15.6 PE=2	AP2 domain	[K] LSE0337 A Ovule development protein/AP2 domain transcription factor	http://plntfdb.bio.uni-potsdam.de/v3.0/fam_mem.php?family_id=AP2-EREBP	IPR031112; AP2-like ethylene-responsive transcription factor
HLJ_peak_1152	1152	tig00007244	709145	709445	301	*	Cor0106550.1	2.93036	Distal Intergenic	1.52174	3.8242e-118	up	K09955//uncharacterized protein	N/A	PREDICTED: uncharacterized protein LOC108980890 [Juglans regia]	Uncharacterized protein {ECO:0000313|EMBL:SPD31352.1} OS=Fagus sylvatica (Beechnut) ORFNames=FSB_LOCUS59234 {ECO:0000313|EMBL:SPD31352.1} PE=4	N/A	Beta-L-arabinofuranosidase, GH127	[X] LSE1754 A Unnamed protein	N/A	IPR012878; Beta-L-arabinofuranosidase, GH127
HLJ_peak_1161	1161	tig00007246	339435	339771	337	*	Cor0191600.1	3.07725	Intron (Cor0191600.1/Cor0191600, intron 3 of 15)	1.10927	6.88922e-77	up	N/A	N/A	PREDICTED: nuclear pore complex protein NUP214 isoform X2 [Juglans regia]	Uncharacterized protein {ECO:0000313|EMBL:SPD32190.1} OS=Fagus sylvatica (Beechnut) ORFNames=FSB_LOCUS60072 {ECO:0000313|EMBL:SPD32190.1} PE=4	Nuclear pore complex protein NUP214 {ECO:0000303|PubMed:21189294} Nucleoporin 214 Protein EMBRYO DEFECTIVE 1011 {ECO:0000303|PubMed:15266054} Protein LNO1 {ECO:0000303|PubMed:22898497} Protein LONO1 {ECO:0000303|PubMed:22898497} OS=Arabidopsis thaliana (Mouse-ear cress) ORFNames=T5A14.5 {ECO:0000312|EMBL:AAD10642.1} PE=1	N/A	N/A	N/A	N/A
HLJ_peak_1165	1165	tig00007249	570624	570885	262	*	Cor0148640.1	3.66295	Promoter (2-3kb)	1.03251	1.84435e-11	up	K09377//cysteine and glycine-rich protein	N/A	PREDICTED: LIM domain-containing protein WLIM1-like [Juglans regia]	LIM domain-containing protein WLIM1-like {ECO:0000313|RefSeq:XP_018805993.1} OS=Juglans regia (English walnut) Name=LOC108979722 {ECO:0000313|RefSeq:XP_018805993.1} PE=4	LIM domain-containing protein WLIM1 {ECO:0000305} Widely-expressed LIM protein 1 {ECO:0000303|PubMed:11085265} Short=AtWLIM1 OS=Arabidopsis thaliana (Mouse-ear cress) ORFNames=F14N23.8 {ECO:0000312|EMBL:AAD32870.1} PE=1	LIM domain	[TZ] KOG1700 Regulatory protein MLP and related LIM proteins	http://plntfdb.bio.uni-potsdam.de/v3.0/fam_mem.php?family_id=LIM	IPR001781; Zinc finger, LIM-type
HLJ_peak_1202	1202	tig00007274	171859	172615	757	*	Cor0213680.1	2.84581	Exon (Cor0213680.1/Cor0213680, exon 13 of 14)	1.01672	1.94282e-74	up	N/A	N/A	PREDICTED: E3 ubiquitin-protein ligase listerin [Juglans regia] >XP_018828509.1 PREDICTED: E3 ubiquitin-protein ligase listerin [Juglans regia]	Uncharacterized protein {ECO:0000313|EMBL:SPC74316.1} OS=Fagus sylvatica (Beechnut) ORFNames=FSB_LOCUS2198 {ECO:0000313|EMBL:SPC74316.1} PE=4	E3 ubiquitin-protein ligase listerin EC=2.3.2.27 RING-type E3 ubiquitin transferase listerin {ECO:0000305} OS=Arabidopsis thaliana (Mouse-ear cress) OrderedLocusNames=At5g58410 ORFNames=MCK7.28 PE=3	N/A	[O] KOG0803 Predicted E3 ubiquitin ligase	N/A	N/A
HLJ_peak_1203	1203	tig00007274	189995	190492	498	*	Cor0213700.1	4.37299	Promoter (<=1kb)	1.01672	1.94282e-74	up	N/A	GO:0008270//molecular_function zinc ion binding	PREDICTED: pentatricopeptide repeat-containing protein ELI1, chloroplastic-like [Juglans regia]	pentatricopeptide repeat-containing protein ELI1, chloroplastic-like {ECO:0000313|RefSeq:XP_018828454.1} OS=Juglans regia (English walnut) Name=LOC108996867 {ECO:0000313|RefSeq:XP_018828454.1} PE=4	Pentatricopeptide repeat-containing protein At4g30700 Protein DYW9 OS=Arabidopsis thaliana (Mouse-ear cress) ORFNames=T10C21.50 PE=2	DYW family of nucleic acid deaminases	[R] KOG4197 FOG: PPR repeat	N/A	IPR032867; DYW domain
HLJ_peak_1216	1216	tig00007285	506549	506865	317	*	Cor0068150.1	3.29515	Intron (Cor0068150.1/Cor0068150, intron 7 of 8)	1.16078	8.45876e-47	up	N/A	GO:0046983//molecular_function protein dimerization activity	PREDICTED: transcription factor bHLH155-like isoform X2 [Juglans regia]	transcription factor bHLH155-like isoform X2 {ECO:0000313|RefSeq:XP_018825261.1} OS=Juglans regia (English walnut) Name=LOC108994488 {ECO:0000313|RefSeq:XP_018825261.1} PE=4	Transcription factor EMB1444 {ECO:0000303|PubMed:12586866} Basic helix-loop-helix protein 169 {ECO:0000305} Short=AtbHLH169 {ECO:0000305} Short=bHLH 169 {ECO:0000305} LONESOME HIGHWAY-like protein 1 {ECO:0000303|PubMed:17626058} Protein EMBRYO DEFECTIVE 1444 {ECO:0000303|PubMed:12586866} bHLH transcription factor bHLH169 {ECO:0000305} OS=Arabidopsis thaliana (Mouse-ear cress) ORFNames=T21E18.20 {…	bHLH-MYC and R2R3-MYB transcription factors N-terminal	[RK] LSE0475 A Predicted bHLH transcription factor	N/A	IPR025610; Transcription factor MYC/MYB N-terminal
HLJ_peak_1217	1217	tig00007285	857431	857688	258	*	Cor0068450.1	3.66582	Downstream (1-2kb)	1.19334	1.49464e-108	up	K06636//structural maintenance of chromosome 1	GO:0003682//molecular_function chromatin binding;GO:0007064//biological_process mitotic sister chromatid cohesion;GO:0008278//cellular_component cohesin complex;GO:0046982//molecular_function protein heterodimerization activity	structural maintenance of chromosomes protein 1-like [Momordica charantia]	Structural maintenance of chromosomes protein {ECO:0000256|PIRNR:PIRNR005719} OS=Juglans regia (English walnut) Name=LOC108995972 {ECO:0000313|RefSeq:XP_018827209.1} PE=3	Structural maintenance of chromosomes protein 1 Short=SMC protein 1 Short=SMC-1 Chromosome segregation protein SMC-1 Cohesin complex subunit SMC-1 Protein TITAN8 OS=Arabidopsis thaliana (Mouse-ear cress) ORFNames=T5N23.30 PE=2	RecF/RecN/SMC N terminal domain	[D] KOG0018 Structural maintenance of chromosome protein 1 (sister chromatid cohesion complex Cohesin, subunit SMC1)	N/A	IPR028468; Structural maintenance of chromosomes protein 1
HLJ_peak_1226	1226	tig00007285	2626323	2626960	638	*	Cor0070010.1	2.82409	Promoter (2-3kb)	1.18922	3.60046e-85	up	N/A	N/A	PREDICTED: probable LRR receptor-like serine/threonine-protein kinase At5g48740 isoform X1 [Juglans regia]	probable LRR receptor-like serine/threonine-protein kinase At5g48740 isoform X1 {ECO:0000313|RefSeq:XP_018818028.1} OS=Juglans regia (English walnut) Name=LOC108989040 {ECO:0000313|RefSeq:XP_018818028.1} PE=4	Probable LRR receptor-like serine/threonine-protein kinase At5g48740 EC=2.7.11.1 Precursor OS=Arabidopsis thaliana (Mouse-ear cress) OrderedLocusNames=At5g48740 ORFNames=K24G6.7 PE=1	N/A	[T] LSE0002 A Receptor protein kinase containing LRR repeats	N/A	N/A
HLJ_peak_1236	1236	tig00007294	403368	403615	248	*	Cor0193400.1	3.20566	Intron (Cor0193390.1/Cor0193390, intron 9 of 10)	1.80809	0.000388334	up	#N/A	#N/A	#N/A	#N/A	#N/A	#N/A	#N/A	#N/A	#N/A
HLJ_peak_1242	1242	tig00007297	3273902	3274319	418	*	Cor0034390.1	2.981	Promoter (<=1kb)	8.95705	1.53928e-08	up	K11816//indole-3-pyruvate monooxygenase [EC:1.14.13.168]	GO:0016491//molecular_function oxidoreductase activity;GO:0055114//biological_process oxidation-reduction process;GO:0004499//molecular_function N,N-dimethylaniline monooxygenase activity;GO:0050660//molecular_function flavin adenine dinucleotide binding;GO:0050661//molecular_function NADP binding	PREDICTED: probable indole-3-pyruvate monooxygenase YUCCA10 [Juglans regia]	Flavin-containing monooxygenase {ECO:0000256|RuleBase:RU361177} EC=1.-.-.- {ECO:0000256|RuleBase:RU361177} OS=Fagus sylvatica (Beechnut) ORFNames=FSB_LOCUS53466 {ECO:0000313|EMBL:SPD25584.1} PE=3	Probable indole-3-pyruvate monooxygenase YUCCA10 EC=1.14.13.168 Flavin-containing monooxygenase YUCCA10 OS=Arabidopsis thaliana (Mouse-ear cress) ORFNames=F27K7.7 PE=2	Flavin-binding monooxygenase-like	[Q] KOG1399 Flavin-containing monooxygenase	N/A	IPR020946; Flavin monooxygenase-like
HLJ_peak_1244	1244	tig00007300	374107	374454	348	*	Cor0144080.1	2.93827	Promoter (<=1kb)	2.28816	5.05438e-58	up	K17471//sulfate transporter 3	GO:0008271//molecular_function secondary active sulfate transmembrane transporter activity;GO:0008272//biological_process sulfate transport;GO:0016020//cellular_component membrane;GO:0055085//biological_process transmembrane transport;GO:0015116//molecular_function sulfate transmembrane transporter activity;GO:0016021//cellular_component integral component of membrane	PREDICTED: probable sulfate transporter 3.3 [Juglans regia]	probable sulfate transporter 3.3 {ECO:0000313|RefSeq:XP_018824728.1} OS=Juglans regia (English walnut) Name=LOC108994091 {ECO:0000313|RefSeq:XP_018824728.1} PE=3	Probable sulfate transporter 3.3 AST91 OS=Arabidopsis thaliana (Mouse-ear cress) Name=SULTR33 OrderedLocusNames=At1g23090 ORFNames=T26J12.13 PE=2	Sulfate permease family	[P] KOG0236 Sulfate/bicarbonate/oxalate exchanger SAT-1 and related transporters (SLC26 family)	N/A	IPR030313; Sulfate transporter 3.3
HLJ_peak_1275	1275	tig00007317	777977	778299	323	*	Cor0139110.1	3.63308	Intron (Cor0139100.1/Cor0139100, intron 3 of 3)	2.12146	2.38689e-08	up	N/A	GO:0015098//molecular_function molybdate ion transmembrane transporter activity;GO:0015689//biological_process molybdate ion transport	PREDICTED: molybdate transporter 1-like isoform X1 [Juglans regia]	molybdate transporter 1-like isoform X2 {ECO:0000313|RefSeq:XP_018834721.1} OS=Juglans regia (English walnut) Name=LOC109001774 {ECO:0000313|RefSeq:XP_018834721.1} PE=4	Molybdate transporter 1 Sulfate transporter like protein 5.2 OS=Arabidopsis thaliana (Mouse-ear cress) ORFNames=F3N11.13 PE=1	Molybdate transporter of MFS superfamily	[X] LSE2027 A Unnamed protein	N/A	IPR031563; Molybdate transporter 1/2
HLJ_peak_1276	1276	tig00007317	969435	969953	519	*	Cor0139190.1	3.63308	Exon (Cor0139190.1/Cor0139190, exon 4 of 5)	3.05267	7.51565e-91	up	N/A	GO:0005216//molecular_function ion channel activity;GO:0006811//biological_process ion transport;GO:0016020//cellular_component membrane;GO:0055085//biological_process transmembrane transport	hypothetical protein CICLE_v10007893mg [Citrus clementina] >ESR63827.1 hypothetical protein CICLE_v10007893mg [Citrus clementina]	Uncharacterized protein {ECO:0000313|EMBL:ESR63828.1} OS=Citrus clementina ORFNames=CICLE_v10007893mg {ECO:0000313|EMBL:ESR63828.1} PE=4	Potassium channel KAT3 AKT4 AtKC1 Potassium channel TKC OS=Arabidopsis thaliana (Mouse-ear cress) ORFNames=F4D11.150 PE=1	Ion transport protein	[PT] KOG0498 K+-channel ERG and related proteins, contain PAS/PAC sensor domain	N/A	IPR005821; Ion transport domain
HLJ_peak_1279	1279	tig00007321	198089	198368	280	*	Cor0094770.1	2.90577	Promoter (2-3kb)	1.7323	3.00599e-217	up	K01535//H+-transporting ATPase [EC:3.6.3.6]	GO:0016021//cellular_component integral component of membrane	PREDICTED: plasma membrane ATPase 4 [Juglans regia]	Plasma membrane ATPase {ECO:0000256|RuleBase:RU362083} EC=7.1.2.1 {ECO:0000256|RuleBase:RU362083} OS=Juglans regia (English walnut) Name=LOC109002787 {ECO:0000313|RefSeq:XP_018836225.1} PE=3	Plasma membrane ATPase 4 EC=7.1.2.1 Proton pump 4 OS=Nicotiana plumbaginifolia (Leadwort-leaved tobacco) (Tex-Mex tobacco) Name=PMA4 PE=2	Cation transporter/ATPase, N-terminus	[P] KOG0205 Plasma membrane H+-transporting ATPase	N/A	IPR004014; Cation-transporting P-type ATPase, N-terminal
HLJ_peak_1286	1286	tig00007339	97319	97634	316	*	Cor0192560.1	2.54625	Promoter (2-3kb)	4.43085	2.78139e-162	up	K14638//solute carrier family 15 (peptide/histidine transporter), member 3/4	GO:0016020//cellular_component membrane;GO:0022857//molecular_function transmembrane transporter activity;GO:0055085//biological_process transmembrane transport	PREDICTED: protein NRT1/ PTR FAMILY 5.4-like isoform X1 [Juglans regia]	protein NRT1/ PTR FAMILY 5.4-like isoform X2 {ECO:0000313|RefSeq:XP_018849438.1} OS=Juglans regia (English walnut) Name=LOC109012321 {ECO:0000313|RefSeq:XP_018849438.1} PE=4	Protein NRT1/ PTR FAMILY 5.4 Short=AtNPF5.4 OS=Arabidopsis thaliana (Mouse-ear cress) Name=NPF5.4 OrderedLocusNames=At3g54450 ORFNames=T14E10.20 PE=2	POT family	[E] KOG1237 H+/oligopeptide symporter	N/A	IPR020846; Major facilitator superfamily domain
HLJ_peak_1301	1301	tig00007341	1629179	1629748	570	*	Cor0074470.1	3.04791	Distal Intergenic	3.78098	0.0203904	up	K07466//replication factor A1	N/A	uncharacterized protein LOC107492778 [Arachis duranensis]	N/A	N/A	N/A	N/A	N/A	N/A
HLJ_peak_1310	1310	tig00007343	196526	196777	252	*	Cor0104370.1	3.39297	Promoter (2-3kb)	1.10199	3.78619e-138	up	N/A	N/A	PREDICTED: uncharacterized protein LOC108997369 [Juglans regia]	uncharacterized protein LOC108997369 {ECO:0000313|RefSeq:XP_018829139.1} OS=Juglans regia (English walnut) Name=LOC108997369 {ECO:0000313|RefSeq:XP_018829139.1} PE=4	N/A	N/A	[E] KOG2275 Aminoacylase ACY1 and related metalloexopeptidases	N/A	N/A
HLJ_peak_1321	1321	tig00007350	15747	16162	416	*	Cor0145690.1	4.0605	Downstream (<1kb)	3.66342	0	up	K01466//allantoinase [EC:3.5.2.5]	GO:0016787//molecular_function hydrolase activity	PREDICTED: allantoinase [Juglans regia]	allantoinase {ECO:0000313|RefSeq:XP_018820181.1} OS=Juglans regia (English walnut) Name=LOC108990626 {ECO:0000313|RefSeq:XP_018820181.1} PE=4	Allantoinase Short=AtALN EC=3.5.2.5 OS=Arabidopsis thaliana (Mouse-ear cress) Name=ALN OrderedLocusNames=At4g04955 ORFNames=T1J1 PE=1	Amidohydrolase family	[F] KOG2584 Dihydroorotase and related enzymes	N/A	IPR006680; Amidohydrolase-related
HLJ_peak_1323	1323	tig00007350	616948	617358	411	*	Cor0146070.1	3.29665	Distal Intergenic	4.12816	1.55498e-167	up	N/A	GO:0003677//molecular_function DNA binding;GO:0006355//biological_process regulation of transcription, DNA-templated	PREDICTED: NAC transcription factor 25 [Juglans regia]	NAC transcription factor 25 {ECO:0000313|RefSeq:XP_018807000.1} OS=Juglans regia (English walnut) Name=LOC108980516 {ECO:0000313|RefSeq:XP_018807000.1} PE=4	NAC transcription factor 25 Short=AtNAC025 OS=Arabidopsis thaliana (Mouse-ear cress) OrderedLocusNames=At1g61110 ORFNames=F11P17.16 PE=2	No apical meristem (NAM) protein	[S] LSE0117 A No apical meristem (NAM) developmental protein and related proteins	http://plntfdb.bio.uni-potsdam.de/v3.0/fam_mem.php?family_id=NAC	IPR003441; NAC domain
HLJ_peak_1329	1329	tig00007354	1936778	1937148	371	*	Cor0079220.1	3.84679	Exon (Cor0079210.1/Cor0079210, exon 9 of 9)	1.00278	3.13347e-24	up	K09338//homeobox-leucine zipper protein	GO:0003677//molecular_function DNA binding;GO:0008289//molecular_function lipid binding	homeobox-leucine zipper protein MERISTEM L1 [Herrania umbratica] >XP_021294395.1 homeobox-leucine zipper protein MERISTEM L1 [Herrania umbratica] >XP_021294396.1 homeobox-leucine zipper protein MERISTEM L1 [Herrania umbratica] >XP_021294397.1 homeobox-leucine zipper protein MERISTEM L1 [Herrania umbratica]	Uncharacterized protein {ECO:0000313|EMBL:SPD27452.1} OS=Fagus sylvatica (Beechnut) ORFNames=FSB_LOCUS55334 {ECO:0000313|EMBL:SPD27452.1} PE=4	Homeobox-leucine zipper protein PROTODERMAL FACTOR 2 HD-ZIP protein PDF2 Homeodomain transcription factor PDF2 OS=Arabidopsis thaliana (Mouse-ear cress) Name=PDF2 OrderedLocusNames=At4g04890 ORFNames=T1J1.3 PE=2	Homeobox domain	[K] LSE0187 A Homeodomain protein, contains START domain	http://plntfdb.bio.uni-potsdam.de/v3.0/fam_mem.php?family_id=HB	IPR002913; START domain
HLJ_peak_1335	1335	tig00007354	2444332	2444594	263	*	Cor0079640.1	2.86862	Promoter (<=1kb)	3.69836	6.05831e-83	up	N/A	N/A	PREDICTED: uncharacterized protein LOC108988712 [Juglans regia]	uncharacterized protein LOC108988712 {ECO:0000313|RefSeq:XP_018817585.1} OS=Juglans regia (English walnut) Name=LOC108988712 {ECO:0000313|RefSeq:XP_018817585.1} PE=4	N/A	Senescence regulator	[X] LSE1217 A Unnamed protein	N/A	IPR007608; Senescence regulator S40
HLJ_peak_1341	1341	tig00007356	692079	692574	496	*	Cor0161070.1	4.20908	Promoter (<=1kb)	1.67449	2.63601e-09	up	N/A	N/A	PREDICTED: plastid-lipid-associated protein, chloroplastic-like [Juglans regia]	plastid-lipid-associated protein, chloroplastic-like {ECO:0000313|RefSeq:XP_018822923.1} OS=Juglans regia (English walnut) Name=LOC108992748 {ECO:0000313|RefSeq:XP_018822923.1} PE=4	Plastid-lipid-associated protein, chloroplastic CitPAP Precursor OS=Citrus unshiu (Satsuma mandarin) (Citrus nobilis var. unshiu) Name=PAP PE=2	PAP_fibrillin	[I] LSE1559 A Plastid lipid-associated protein	N/A	IPR006843; Plastid lipid-associated protein/fibrillin conserved domain
HLJ_peak_1343	1343	tig00007358	84993	85278	286	*	Cor0195310.1	4.0605	Distal Intergenic	1.37805	5.87095e-85	up	N/A	GO:0005515//molecular_function protein binding	PREDICTED: F-box protein CPR30-like [Juglans regia] >XP_018853200.1 PREDICTED: F-box protein CPR30-like [Juglans regia] >XP_018853201.1 PREDICTED: F-box protein CPR30-like [Juglans regia] >XP_018853202.1 PREDICTED: F-box protein CPR30-like [Juglans regia] >XP_018853203.1 PREDICTED: F-box protein CPR30-like [Juglans regia] >XP_018805474.1 PREDICTED: F-box protein CPR30-like [Juglans regia] >XP_018…	F-box protein CPR30-like {ECO:0000313|RefSeq:XP_018805474.1, ECO:0000313|RefSeq:XP_018805475.1, ECO:0000313|RefSeq:XP_018805476.1} F-box protein CPR30-like isoform X1 {ECO:0000313|RefSeq:XP_018809560.1, ECO:0000313|RefSeq:XP_018809561.1, ECO:0000313|RefSeq:XP_018809562.1} OS=Juglans regia (English walnut) ECO:0000313|RefSeq:XP_018809564.1, ECO:0000313|RefSeq:XP_018809565.1} PE=4	F-box protein CPR1 Protein CONSTITUTIVE EXPRESSER OF PR GENES 1 Protein CONSTITUTIVE EXPRESSER OF PR GENES 30 {ECO:0000303|PubMed:19682297} OS=Arabidopsis thaliana (Mouse-ear cress) OrderedLocusNames=At4g12560 ORFNames=T1P17.150 PE=1	F-box associated	[R] LSE0004 A F-box domain	N/A	IPR006527; F-box associated domain, type 1
HLJ_peak_1344	1344	tig00007358	220105	220412	308	*	Cor0195450.1	3.03085	Promoter (1-2kb)	1.21953	4.59691e-07	up	K08867//WNK lysine deficient protein kinase [EC:2.7.11.1]	GO:0004672//molecular_function protein kinase activity;GO:0005524//molecular_function ATP binding;GO:0006468//biological_process protein phosphorylation	PREDICTED: probable serine/threonine-protein kinase WNK11 [Juglans regia]	probable serine/threonine-protein kinase WNK11 {ECO:0000313|RefSeq:XP_018828343.1} OS=Juglans regia (English walnut) Name=LOC108996787 {ECO:0000313|RefSeq:XP_018828343.1} PE=4	Probable serine/threonine-protein kinase WNK11 Short=AtWNK11 EC=2.7.11.1 Protein kinase with no lysine 11 OS=Arabidopsis thaliana (Mouse-ear cress) Name=WNK11 OrderedLocusNames=At5g55560 ORFNames=MWC10.1 PE=2	Protein kinase domain	[R] KOG0584 Serine/threonine protein kinase	N/A	IPR000719; Protein kinase domain
HLJ_peak_1368	1368	tig00007400	490668	490960	293	*	Cor0152780.1	3.41937	Promoter (<=1kb)	1.28996	1.35311e-06	up	N/A	GO:0005515//molecular_function protein binding	F-box protein At3g07870-like [Hevea brasiliensis]	F-box/kelch-repeat protein At3g06240-like {ECO:0000313|RefSeq:XP_016476971.1} OS=Nicotiana tabacum (Common tobacco) Name=LOC107798477 {ECO:0000313|RefSeq:XP_016476971.1} PE=4	F-box protein At3g07870 OS=Arabidopsis thaliana (Mouse-ear cress) OrderedLocusNames=At3g07870 ORFNames=F17A17.21 PE=2	F-box domain	[R] LSE0005 A F-box domain	N/A	IPR013187; F-box associated domain, type 3
HLJ_peak_1373	1373	tig00007414	450203	450538	336	*	Cor0139650.1	3.54378	Intron (Cor0139650.1/Cor0139650, intron 6 of 10)	1.18119	1.77117e-27	up	K09527//DnaJ homolog subfamily C member 7	GO:0005515//molecular_function protein binding	PREDICTED: uncharacterized protein LOC108982058 [Juglans regia]	uncharacterized protein LOC108982058 {ECO:0000313|RefSeq:XP_018808878.1} OS=Juglans regia (English walnut) Name=LOC108982058 {ECO:0000313|RefSeq:XP_018808878.1} PE=4	DnaJ protein homolog 2 Precursor OS=Allium porrum (Leek) (Allium ampeloprasum var. porrum) Name=LDJ2 PE=2	Tetratricopeptide repeat	[O] KOG0550 Molecular chaperone (DnaJ superfamily)	N/A	IPR019734; Tetratricopeptide repeat
HLJ_peak_1374	1374	tig00007414	465825	466107	283	*	Cor0139670.1	2.58221	Promoter (2-3kb)	1.49431	1.5594e-21	up	K00279//cytokinin dehydrogenase [EC:1.5.99.12]	GO:0016614//molecular_function oxidoreductase activity, acting on CH-OH group of donors;GO:0050660//molecular_function flavin adenine dinucleotide binding;GO:0055114//biological_process oxidation-reduction process;GO:0009690//biological_process cytokinin metabolic process;GO:0019139//molecular_function cytokinin dehydrogenase activity;GO:0016491//molecular_function oxidoreductase activity	PREDICTED: cytokinin dehydrogenase 1-like isoform X2 [Juglans regia]	cytokinin dehydrogenase 1-like isoform X2 {ECO:0000313|RefSeq:XP_018839620.1} OS=Juglans regia (English walnut) Name=LOC109005247 {ECO:0000313|RefSeq:XP_018839620.1} PE=4	Cytokinin dehydrogenase 1 EC=1.5.99.12 Cytokinin oxidase 1 Short=AtCKX1 Short=CKO 1 Precursor OS=Arabidopsis thaliana (Mouse-ear cress) Name=CKX1 OrderedLocusNames=At2g41510 ORFNames=T32G6.3 PE=1	FAD binding domain	[C] KOG1231 Proteins containing the FAD binding domain	N/A	IPR016166; FAD-binding, type 2
HLJ_peak_1385	1385	tig00007416	152954	153239	286	*	Cor0187330.1	4.27421	Intron (Cor0187320.1/Cor0187320, intron 11 of 11)	3.56625	2.13074e-14	up	N/A	N/A	PREDICTED: transcription repressor OFP6-like [Juglans regia]	transcription repressor OFP6-like {ECO:0000313|RefSeq:XP_018810338.1} OS=Juglans regia (English walnut) Name=LOC108983225 {ECO:0000313|RefSeq:XP_018810338.1} PE=4	Transcription repressor OFP6 Ovate family protein 6 Short=AtOFP6 OS=Arabidopsis thaliana (Mouse-ear cress) Name=OFP6 OrderedLocusNames=At3g52525 ORFNames=F22O6 PE=1	Transcriptional repressor, ovate	[X] LSE1209 A Unnamed protein	http://plntfdb.bio.uni-potsdam.de/v3.0/fam_mem.php?family_id=OFP	IPR006458; Ovate protein family, C-terminal
HLJ_peak_1386	1386	tig00007416	174503	174833	331	*	Cor0187340.1	3.34624	Intron (Cor0187350.1/Cor0187350, intron 2 of 2)	3.23313	2.15349e-99	up	N/A	N/A	transcription repressor OFP13-like [Herrania umbratica]	Uncharacterized protein {ECO:0000313|EMBL:SPD27095.1} OS=Fagus sylvatica (Beechnut) ORFNames=FSB_LOCUS54977 {ECO:0000313|EMBL:SPD27095.1} PE=4	Transcription repressor OFP13 Ovate family protein 13 Short=AtOFP13 OS=Arabidopsis thaliana (Mouse-ear cress) Name=OFP13 OrderedLocusNames=At5g04820 ORFNames=MUK11.14 PE=1	Transcriptional repressor, ovate	[X] LSE1209 A Unnamed protein	http://plntfdb.bio.uni-potsdam.de/v3.0/fam_mem.php?family_id=OFP	IPR006458; Ovate protein family, C-terminal
HLJ_peak_1396	1396	tig00007418	1088497	1088777	281	*	Cor0089060.1	3.29515	Promoter (1-2kb)	4.91446	6.37921e-260	up	N/A	GO:0005506//molecular_function iron ion binding;GO:0016705//molecular_function oxidoreductase activity, acting on paired donors, with incorporation or reduction of molecular oxygen;GO:0020037//molecular_function heme binding;GO:0055114//biological_process oxidation-reduction process	PREDICTED: cytochrome P450 76A2-like [Juglans regia]	cytochrome P450 76A2-like {ECO:0000313|RefSeq:XP_018812368.1} OS=Juglans regia (English walnut) Name=LOC108984772 {ECO:0000313|RefSeq:XP_018812368.1} PE=3	Cytochrome P450 76A2 EC=1.14.-.- CYPLXXVIA2 Cytochrome P-450EG7 OS=Solanum melongena (Eggplant) (Aubergine) Name=CYP76A2 Synonyms=CYPEG7 PE=2	Cytochrome P450	[Q] KOG0156 Cytochrome P450 CYP2 subfamily	N/A	IPR001128; Cytochrome P450
HLJ_peak_1412	1412	tig00007496	111832	112152	321	*	Cor0214940.1	2.99194	Promoter (<=1kb)	3.06473	0.0439077	up	K12471//epsin	N/A	PREDICTED: clathrin interactor 1 [Juglans regia]	clathrin interactor 1 {ECO:0000313|RefSeq:XP_018820907.1} OS=Juglans regia (English walnut) Name=LOC108991196 {ECO:0000313|RefSeq:XP_018820907.1} PE=4	N/A	ENTH domain	[F] KOG2056 Equilibrative nucleoside transporter protein	N/A	IPR013809; ENTH domain

## Sheet: Ov2.1
							Table S4 ChARF3 regulated target genes at three ovule development stages
peak_name	原排序	seqnames	start	end	width	strand	Gene ID	fold_enrichment	annotation	log2(Ov2/Ov1)	padj	regulated	kegg	go	nr	trembl	swissprot	pfam	kog	tf	IPR
HLJ619_peak_1	1	tig00000042	67893	68374	482	*	Cor0220710.1	3.34622	Distal Intergenic	-2.24547	6.17374e-89	down	K09286//EREBP-like factor	GO:0003700//molecular_function DNA-binding transcription factor activity;GO:0006355//biological_process regulation of transcription, DNA-templated	PREDICTED: ethylene-responsive transcription factor 2-like [Juglans regia]	ethylene-responsive transcription factor 2-like {ECO:0000313|RefSeq:XP_018839480.1} OS=Juglans regia (English walnut) Name=LOC109005134 {ECO:0000313|RefSeq:XP_018839480.1} PE=4	Ethylene-responsive transcription factor 1A Short=AtERF1A Ethylene-responsive element-binding factor 1A Short=EREBP-1A OS=Arabidopsis thaliana (Mouse-ear cress) ORFNames=dl4785w, FCAALL.123 PE=1	AP2 domain	[K] LSE0301 A AP2 domain transcription factor	http://plntfdb.bio.uni-potsdam.de/v3.0/fam_mem.php?family_id=AP2-EREBP	IPR001471; AP2/ERF domain
HLJ619_peak_3	3	tig00000184	285993	286619	627	*	Cor0204180.1	3.61877	Exon (Cor0204180.1/Cor0204180, exon 3 of 6)	-1.1801	3.85523e-81	down	N/A	GO:0005524//molecular_function ATP binding	PREDICTED: uncharacterized protein LOC109012823 [Juglans regia]	uncharacterized protein LOC109012823 {ECO:0000313|RefSeq:XP_018850191.1} OS=Juglans regia (English walnut) Name=LOC109012823 {ECO:0000313|RefSeq:XP_018850191.1} PE=4	ATPase family AAA domain-containing protein At1g05910 OS=Arabidopsis thaliana (Mouse-ear cress) OrderedLocusNames=At1g05910 ORFNames=T20M3.19 PE=2	ATPase family associated with various cellular activities (AAA)	[O] KOG0732 AAA+-type ATPase containing the bromodomain	N/A	IPR034732; Extended PHD (ePHD) domain
HLJ619_peak_7	7	tig00000191	92537	92908	372	*	Cor0221350.1	4.84213	Promoter (<=1kb)	-1.6824	8.71167e-130	down	K09286//EREBP-like factor	GO:0003700//molecular_function DNA-binding transcription factor activity;GO:0006355//biological_process regulation of transcription, DNA-templated	PREDICTED: ethylene-responsive transcription factor 4-like [Juglans regia]	ethylene-responsive transcription factor 4-like {ECO:0000313|RefSeq:XP_018850901.1} OS=Juglans regia (English walnut) Name=LOC109013315 {ECO:0000313|RefSeq:XP_018850901.1} PE=4	Ethylene-responsive transcription factor 4 Short=AtERF4 Ethylene-responsive element-binding factor 4 Short=EREBP-4 Protein RELATED TO APETALA2 5 OS=Arabidopsis thaliana (Mouse-ear cress) OrderedLocusNames=At3g15210 ORFNames=K7L4.1 PE=1	AP2 domain	[K] LSE0301 A AP2 domain transcription factor	http://plntfdb.bio.uni-potsdam.de/v3.0/fam_mem.php?family_id=AP2-EREBP	IPR001471; AP2/ERF domain
HLJ619_peak_9	9	tig00000217	212413	212800	388	*	Cor0209030.1	3.7675	Distal Intergenic	-1.96899	1.47448e-189	down	N/A	GO:0004672//molecular_function protein kinase activity;GO:0006468//biological_process protein phosphorylation;GO:0005524//molecular_function ATP binding;GO:0048544//biological_process recognition of pollen	PREDICTED: uncharacterized protein LOC109013535 [Juglans regia]	uncharacterized protein LOC109013535 {ECO:0000313|RefSeq:XP_018851216.1} OS=Juglans regia (English walnut) Name=LOC109013535 {ECO:0000313|RefSeq:XP_018851216.1} PE=4	G-type lectin S-receptor-like serine/threonine-protein kinase At4g27290 EC=2.7.11.1 Precursor OS=Arabidopsis thaliana (Mouse-ear cress) OrderedLocusNames=At4g27290 ORFNames=M4I22.100 PE=3	PAN-like domain	[T] LSE0015 A Receptor-like protein kinase, contains lectin domains	N/A	IPR003609; PAN/Apple domain
HLJ619_peak_17	17	tig00000558	11283	11897	615	*	Cor0222940.1	4.39125	Promoter (<=1kb)	-1.12985	1.66347e-24	down	N/A	GO:0006486//biological_process protein glycosylation;GO:0016757//molecular_function transferase activity, transferring glycosyl groups	PREDICTED: probable glycosyltransferase At3g07620 [Juglans regia]	probable glycosyltransferase At3g07620 {ECO:0000313|RefSeq:XP_018829251.1} OS=Juglans regia (English walnut) Name=LOC108997430 {ECO:0000313|RefSeq:XP_018829251.1} PE=3	Probable glycosyltransferase At3g07620 EC=2.4.-.- OS=Arabidopsis thaliana (Mouse-ear cress) OrderedLocusNames=At3g07620 ORFNames=MLP3.7 PE=3	Exostosin family	[GMW] KOG1021 Acetylglucosaminyltransferase EXT1/exostosin 1	N/A	IPR004263; Exostosin-like
HLJ619_peak_30	30	tig00000657	2371367	2371862	496	*	Cor0051420.1	3.13474	Distal Intergenic	-2.69687	0	down	K09338//homeobox-leucine zipper protein	GO:0003677//molecular_function DNA binding;GO:0008289//molecular_function lipid binding	PREDICTED: homeobox-leucine zipper protein ATHB-15-like [Juglans regia] >XP_018805753.1 PREDICTED: homeobox-leucine zipper protein ATHB-15-like [Juglans regia]	homeobox-leucine zipper protein ATHB-15-like {ECO:0000313|RefSeq:XP_018805752.1, ECO:0000313|RefSeq:XP_018805753.1} OS=Juglans regia (English walnut) ECO:0000313|RefSeq:XP_018805753.1} PE=4	Homeobox-leucine zipper protein ATHB-8 HD-ZIP protein ATHB-8 Homeodomain transcription factor ATHB-8 OS=Arabidopsis thaliana (Mouse-ear cress) ORFNames=T16I18.90 PE=1	Homeobox domain	[K] LSE0187 A Homeodomain protein, contains START domain	http://plntfdb.bio.uni-potsdam.de/v3.0/fam_mem.php?family_id=HB	IPR013978; MEKHLA
HLJ619_peak_43	43	tig00001036	4341	4756	416	*	Cor0221380.1	3.34622	Distal Intergenic	-1.3177	6.81254e-20	down	N/A	GO:0005515//molecular_function protein binding	PREDICTED: leucine-rich repeat extensin-like protein 4 [Juglans regia]	leucine-rich repeat extensin-like protein 4 {ECO:0000313|RefSeq:XP_018846397.1} OS=Juglans regia (English walnut) Name=LOC109010130 {ECO:0000313|RefSeq:XP_018846397.1} PE=4	N/A	Leucine rich repeat	[M] LSE0601 A Pollen extensin-like protein (Pex)	N/A	IPR001611; Leucine-rich repeat
HLJ619_peak_51	51	tig00001247	173422	173928	507	*	Cor0198040.1	3.30821	Distal Intergenic	-1.22643	4.46158e-18	down	N/A	N/A	PREDICTED: basic leucine zipper 61 [Juglans regia] >XP_018810005.1 PREDICTED: basic leucine zipper 61 [Juglans regia] >XP_018810006.1 PREDICTED: basic leucine zipper 61 [Juglans regia]	basic leucine zipper 61 {ECO:0000313|RefSeq:XP_018810004.1, ECO:0000313|RefSeq:XP_018810005.1, ECO:0000313|RefSeq:XP_018810006.1} OS=Juglans regia (English walnut) ECO:0000313|RefSeq:XP_018810005.1, ECO:0000313|RefSeq:XP_018810006.1} PE=4	Uncharacterized protein At4g06598 OS=Arabidopsis thaliana (Mouse-ear cress) OrderedLocusNames=At4g06598 ORFNames=T2P22 PE=2	N/A	[KR] LSE0037 A R2R3-type MYB transcription factors/VIP1, involved in Agrobacterium VirE2 nuclear import and infectivity	N/A	N/A
HLJ619_peak_63	63	tig00001630	435132	435477	346	*	Cor0138100.1	3.20112	Distal Intergenic	-5.13613	3.42333e-165	down	N/A	N/A	PREDICTED: nucleoprotein TPR-like [Juglans regia]	Uncharacterized protein {ECO:0000313|EMBL:SPC96568.1} OS=Fagus sylvatica (Beechnut) ORFNames=FSB_LOCUS24450 {ECO:0000313|EMBL:SPC96568.1} PE=4	N/A	N/A	N/A	N/A	N/A
HLJ619_peak_73	73	tig00002055	54502	55061	560	*	Cor0221240.1	3.15013	Promoter (<=1kb)	-2.32738	0	down	K05349//beta-glucosidase [EC:3.2.1.21]	GO:0004553//molecular_function hydrolase activity, hydrolyzing O-glycosyl compounds;GO:0005975//biological_process carbohydrate metabolic process	PREDICTED: uncharacterized protein LOC108984861 isoform X1 [Juglans regia] >XP_018812487.1 PREDICTED: uncharacterized protein LOC108984861 isoform X2 [Juglans regia] >XP_018812491.1 PREDICTED: uncharacterized protein LOC108984861 isoform X6 [Juglans regia]	Uncharacterized protein {ECO:0000313|EMBL:SPD16499.1} OS=Fagus sylvatica (Beechnut) ORFNames=FSB_LOCUS44381 {ECO:0000313|EMBL:SPD16499.1} PE=3	Beta-xylosidase/alpha-L-arabinofuranosidase 2 {ECO:0000303|PubMed:17615411, ECO:0000312|EMBL:ABQ45228.1} Xylan 1,4-beta-xylosidase/Alpha-L-arabinofuranosidase 2 Short=MsXyl2 {ECO:0000303|PubMed:17615411} Beta-xylosidase EC=3.2.1.37 1,4-beta-D-xylan xylohydrolase {ECO:0000250|UniProtKB:P48792} Xylan 1,4-beta-xylosidase Alpha-L-arabinofuranosidase Short=Arabinosidase {ECO:0000250|UniProtKB:P48792} …	Glycosyl hydrolase family 3 N terminal domain	[GRV] LSE0437 A Predicted beta-glucosidase	N/A	IPR002772; Glycoside hydrolase family 3 C-terminal domain
HLJ619_peak_74	74	tig00002066	22876	23297	422	*	Cor0222910.1	3.23852	Promoter (2-3kb)	-1.44696	2.46493e-79	down	K00487//trans-cinnamate 4-monooxygenase [EC:1.14.13.11]	GO:0005506//molecular_function iron ion binding;GO:0016705//molecular_function oxidoreductase activity, acting on paired donors, with incorporation or reduction of molecular oxygen;GO:0020037//molecular_function heme binding;GO:0055114//biological_process oxidation-reduction process	cinnamate 4-hydroxylase [Astragalus mongholicus]	Uncharacterized protein {ECO:0000313|EMBL:SPD31471.1} OS=Fagus sylvatica (Beechnut) ORFNames=FSB_LOCUS59353 {ECO:0000313|EMBL:SPD31471.1} PE=3	Trans-cinnamate 4-monooxygenase EC=1.14.14.91 {ECO:0000250|UniProtKB:Q04468} Cinnamic acid 4-hydroxylase Short=C4H Short=CA4H Cytochrome P450 73 Cytochrome P450C4H OS=Populus kitakamiensis (Aspen) (Populus sieboldii x Populus grandidentata) Name=CYP73A16 Synonyms=CYP73 PE=2	Cytochrome P450	[Q] KOG0156 Cytochrome P450 CYP2 subfamily	N/A	IPR002401; Cytochrome P450, E-class, group I
HLJ619_peak_90	90	tig00002373	118758	119185	428	*	Cor0211330.1	3.34622	Distal Intergenic	-1.15689	2.0261e-18	down	N/A	GO:0005524//molecular_function ATP binding	PREDICTED: uncharacterized protein LOC108992291 isoform X1 [Juglans regia]	uncharacterized protein LOC108992291 isoform X2 {ECO:0000313|RefSeq:XP_018822358.1} OS=Juglans regia (English walnut) Name=LOC108992291 {ECO:0000313|RefSeq:XP_018822358.1} PE=4	N/A	UvrD/REP helicase N-terminal domain	N/A	N/A	IPR034739; UvrD/AddA helicase, N-terminal
HLJ619_peak_93	93	tig00002377	74943	75311	369	*	Cor0209610.1	4.18277	Promoter (<=1kb)	-1.69136	0.0285428	down	N/A	N/A	PREDICTED: multiple C2 and transmembrane domain-containing protein 1 [Cucumis sativus] >KGN59322.1 hypothetical protein Csa_3G809980 [Cucumis sativus]	Uncharacterized protein {ECO:0000313|EMBL:SPC92420.1} OS=Fagus sylvatica (Beechnut) ORFNames=FSB_LOCUS20302 {ECO:0000313|EMBL:SPC92420.1} PE=4	FT-interacting protein 3 {ECO:0000303|PubMed:29742441} Multiple C2 domain and transmembrane region protein 3 {ECO:0000303|PubMed:29259105} OS=Arabidopsis thaliana (Mouse-ear cress) ORFNames=T10K17.90 {ECO:0000312|EMBL:CAB67616.1} PE=1	C2 domain	[E] LSE0030 A Anthranilate phosphoribosyltransferase and related proteins	N/A	IPR013583; Phosphoribosyltransferase C-terminal
HLJ619_peak_94	94	tig00002380	99966	100731	766	*	Cor0211610.1	4.18277	Distal Intergenic	-1.93002	0.0304608	down	K13691//pathogen-inducible salicylic acid glucosyltransferase [EC:2.4.1.-]	GO:0008152//biological_process metabolic process;GO:0016758//molecular_function transferase activity, transferring hexosyl groups	PREDICTED: UDP-glycosyltransferase 74F2-like [Juglans regia]	Glycosyltransferase {ECO:0000256|RuleBase:RU362057} EC=2.4.1.- {ECO:0000256|RuleBase:RU362057} OS=Juglans regia (English walnut) Name=LOC108988962 {ECO:0000313|RefSeq:XP_018817933.1} PE=3	UDP-glycosyltransferase 74F2 EC=2.4.1.- AtSGT1 Salicylic acid glucosyltransferase 1 OS=Arabidopsis thaliana (Mouse-ear cress) ORFNames=F18O19.7 PE=1	UDP-glucoronosyl and UDP-glucosyl transferase	[GC] KOG1192 UDP-glucuronosyl and UDP-glucosyl transferase	N/A	IPR002213; UDP-glucuronosyl/UDP-glucosyltransferase
HLJ619_peak_99	99	tig00006868	970641	971056	416	*	Cor0127250.1	4.18277	Intron (Cor0127250.1/Cor0127250, intron 1 of 2)	-5.24146	0.000189201	down	K07192//flotillin	GO:0003677//molecular_function DNA binding	flotillin-like protein 3 [Jatropha curcas]	Uncharacterized protein {ECO:0000313|EMBL:KDP37014.1} OS=Jatropha curcas (Barbados nut) ORFNames=JCGZ_06070 {ECO:0000313|EMBL:KDP37014.1} PE=4	Flotillin-like protein 2 Nodulin-like protein 2 OS=Arabidopsis thaliana (Mouse-ear cress) Name=FLOT2 OrderedLocusNames=At5g25260 ORFNames=F21J6.109 PE=2	SPFH domain / Band 7 family	[UZ] KOG2668 Flotillins	http://plntfdb.bio.uni-potsdam.de/v3.0/fam_mem.php?family_id=ABI3VP1	IPR027705; Flotillin family
HLJ619_peak_100	100	tig00006869	127405	128002	598	*	Cor0206540.1	5.10241	Promoter (<=1kb)	-1.26404	3.61597e-06	down	N/A	N/A	PREDICTED: uncharacterized protein LOC108992471 [Juglans regia]	uncharacterized protein LOC108992471 {ECO:0000313|RefSeq:XP_018822634.1} OS=Juglans regia (English walnut) Name=LOC108992471 {ECO:0000313|RefSeq:XP_018822634.1} PE=4	N/A	Protein of unknown function (DUF3537)	[X] LSE1275 A Unnamed protein	N/A	IPR021924; Protein of unknown function DUF3537
HLJ619_peak_106	106	tig00006870	702642	703168	527	*	Cor0120020.1	5.06627	Promoter (1-2kb)	-2.2084	5.20356e-28	down	N/A	N/A	PREDICTED: transcription factor TCP14 [Juglans regia]	transcription factor TCP14 {ECO:0000313|RefSeq:XP_018826533.1} OS=Juglans regia (English walnut) Name=LOC108995415 {ECO:0000313|RefSeq:XP_018826533.1} PE=4	Transcription factor TCP14 {ECO:0000305} Short=AtTCP14 {ECO:0000303|PubMed:17953649} OS=Arabidopsis thaliana (Mouse-ear cress) ORFNames=F1P2.170 {ECO:0000312|EMBL:CAB61988.1} PE=1	non-haem dioxygenase in morphine synthesis N-terminal	[K] LSE0380 A Predicted bHLH transcription factor	http://plntfdb.bio.uni-potsdam.de/v3.0/fam_mem.php?family_id=TCP	IPR026992; Non-haem dioxygenase N-terminal domain
HLJ619_peak_113	113	tig00006874	862799	863337	539	*	Cor0134090.1	3.21034	Promoter (1-2kb)	-3.9549	1.84013e-16	down	K09422//myb proto-oncogene protein, plant	N/A	PREDICTED: transcription factor MYB86-like [Juglans regia]	MYB transcription factor 5 {ECO:0000313|EMBL:AXG64014.1} OS=Betula luminifera Name=MYB5 {ECO:0000313|EMBL:AXG64014.1} PE=2	Transcription factor MYB86 Myb homolog 4 Short=AtMyb4 Myb-related protein 86 Short=AtMYB86 OS=Arabidopsis thaliana (Mouse-ear cress) ORFNames=F21E10.4 PE=2	Myb-like DNA-binding domain	[K] KOG0048 Transcription factor, Myb superfamily	http://plntfdb.bio.uni-potsdam.de/v3.0/fam_mem.php?family_id=MYB	IPR017930; Myb domain
HLJ619_peak_117	117	tig00006876	1085854	1086323	470	*	Cor0142890.1	3.62733	Distal Intergenic	-5.38014	4.533e-35	down	N/A	GO:0005506//molecular_function iron ion binding;GO:0016705//molecular_function oxidoreductase activity, acting on paired donors, with incorporation or reduction of molecular oxygen;GO:0020037//molecular_function heme binding;GO:0055114//biological_process oxidation-reduction process	PREDICTED: cytochrome P450 78A5 [Juglans regia]	Uncharacterized protein {ECO:0000313|EMBL:SPD28812.1} OS=Fagus sylvatica (Beechnut) ORFNames=FSB_LOCUS56694 {ECO:0000313|EMBL:SPD28812.1} PE=3	Cytochrome P450 78A5 EC=1.14.-.- Protein KLUH OS=Arabidopsis thaliana (Mouse-ear cress) ORFNames=F21F23.15 PE=2	Cytochrome P450	[Q] KOG0156 Cytochrome P450 CYP2 subfamily	N/A	IPR002401; Cytochrome P450, E-class, group I
HLJ619_peak_121	121	tig00006878	1088446	1088952	507	*	Cor0136750.1	3.29303	Distal Intergenic	-3.50514	0	down	K01193//beta-fructofuranosidase [EC:3.2.1.26]	GO:0004553//molecular_function hydrolase activity, hydrolyzing O-glycosyl compounds;GO:0005975//biological_process carbohydrate metabolic process	PREDICTED: acid beta-fructofuranosidase-like [Juglans regia]	acid beta-fructofuranosidase-like {ECO:0000313|RefSeq:XP_018844424.1} OS=Juglans regia (English walnut) Name=LOC109008690 {ECO:0000313|RefSeq:XP_018844424.1} PE=3	Acid beta-fructofuranosidase 2, vacuolar {ECO:0000305} EC=3.2.1.26 {ECO:0000269|PubMed:22505690} Vacuolar invertase 2 {ECO:0000303|PubMed:22505690} Short=RvVI2 {ECO:0000303|PubMed:22505690} Precursor OS=Rosa hybrid cultivar PE=2	Glycosyl hydrolases family 32 N-terminal domain	[G] KOG0228 Beta-fructofuranosidase (invertase)	N/A	IPR013189; Glycosyl hydrolase family 32, C-terminal
HLJ619_peak_125	125	tig00006880	580800	581134	335	*	Cor0163630.1	3.40075	Distal Intergenic	-2.00005	2.91364e-79	down	K13993//HSP20 family protein	N/A	hypothetical protein CDL15_Pgr021531 [Punica granatum]	Uncharacterized protein {ECO:0000313|EMBL:OWM86444.1} OS=Punica granatum (Pomegranate) ORFNames=CDL15_Pgr021531 {ECO:0000313|EMBL:OWM86444.1} PE=3	23.6 kDa heat shock protein, mitochondrial Short=AtHsp23.6 Precursor OS=Arabidopsis thaliana (Mouse-ear cress) Name=HSP23.6 OrderedLocusNames=At4g25200 ORFNames=F24A6.40 PE=2	Hsp20/alpha crystallin family	[O] KOG0710 Molecular chaperone (small heat-shock protein Hsp26/Hsp42)	N/A	IPR031107; Small heat shock protein HSP20
HLJ619_peak_147	147	tig00006884	2279163	2279669	507	*	Cor0041940.1	3.16005	Exon (Cor0041950.1/Cor0041950, exon 10 of 12)	-5.74959	1.73997e-70	down	N/A	GO:0004866//molecular_function endopeptidase inhibitor activity	PREDICTED: alpha-amylase/subtilisin inhibitor-like [Juglans regia]	Uncharacterized protein {ECO:0000313|EMBL:SPC83828.1} OS=Fagus sylvatica (Beechnut) {ECO:0000313|EMBL:SPC83835.1} PE=4	N/A	Trypsin and protease inhibitor	N/A	N/A	IPR002160; Proteinase inhibitor I3, Kunitz legume
HLJ619_peak_179	179	tig00006896	986940	987302	363	*	Cor0154380.1	3.71034	Intron (Cor0154380.1/Cor0154380, intron 3 of 6)	-1.53986	9.8264e-298	down	N/A	GO:0004650//molecular_function polygalacturonase activity;GO:0005975//biological_process carbohydrate metabolic process	PREDICTED: probable polygalacturonase isoform X1 [Juglans regia]	Uncharacterized protein {ECO:0000313|EMBL:SPD26954.1} OS=Fagus sylvatica (Beechnut) ORFNames=FSB_LOCUS54836 {ECO:0000313|EMBL:SPD26954.1} PE=3	Probable polygalacturonase Short=PG {ECO:0000250|UniProtKB:Q7M1E7} EC=3.2.1.15 Pectinase {ECO:0000250|UniProtKB:Q7M1E7} OS=Vitis vinifera (Grape) ORFNames=GSVIVT00026920001, LOC100243180 PE=1	Glycosyl hydrolases family 28	[R] TWOG0115 Endo-polygalacturonase	N/A	IPR000743; Glycoside hydrolase, family 28
HLJ619_peak_185	185	tig00006902	208170	208504	335	*	Cor0081020.1	3.18863	Intron (Cor0081010.1/Cor0081010, intron 6 of 9)	-3.4466	1.42071e-24	down	N/A	GO:0016614//molecular_function oxidoreductase activity, acting on CH-OH group of donors;GO:0055114//biological_process oxidation-reduction process;GO:0050660//molecular_function flavin adenine dinucleotide binding	PREDICTED: protein HOTHEAD-like isoform X1 [Citrus sinensis] >XP_006477368.1 PREDICTED: protein HOTHEAD-like isoform X2 [Citrus sinensis]	Uncharacterized protein {ECO:0000313|EMBL:SPC89433.1} OS=Fagus sylvatica (Beechnut) ORFNames=FSB_LOCUS17315 {ECO:0000313|EMBL:SPC89433.1} PE=4	Protein HOTHEAD Protein ADHESION OF CALYX EDGES Precursor OS=Arabidopsis thaliana (Mouse-ear cress) ORFNames=F3N23.17 PE=1	GMC oxidoreductase	[R] KOG1238 Glucose dehydrogenase/choline dehydrogenase/mandelonitrile lyase (GMC oxidoreductase family)	N/A	IPR007867; Glucose-methanol-choline oxidoreductase, C-terminal
HLJ619_peak_188	188	tig00006902	834006	834601	596	*	Cor0081410.1	4.38586	Promoter (1-2kb)	-2.08129	0.0026915	down	N/A	GO:0005506//molecular_function iron ion binding;GO:0016705//molecular_function oxidoreductase activity, acting on paired donors, with incorporation or reduction of molecular oxygen;GO:0020037//molecular_function heme binding;GO:0055114//biological_process oxidation-reduction process	PREDICTED: geraniol 8-hydroxylase-like isoform X1 [Juglans regia] >XP_018820516.1 PREDICTED: geraniol 8-hydroxylase-like isoform X2 [Juglans regia]	geraniol 8-hydroxylase-like isoform X1 {ECO:0000313|RefSeq:XP_018820515.1} geraniol 8-hydroxylase-like isoform X2 {ECO:0000313|RefSeq:XP_018820516.1} OS=Juglans regia (English walnut) ECO:0000313|RefSeq:XP_018820516.1} PE=3	Geraniol 8-hydroxylase EC=1.14.14.83 {ECO:0000269|PubMed:11718718, ECO:0000269|PubMed:21504162} Cytochrome P450 76B6 Geraniol 10-hydroxylase Short=CrG10H OS=Catharanthus roseus (Madagascar periwinkle) (Vinca rosea) Name=CYP76B6 Synonyms=G10H PE=1	Cytochrome P450	[Q] KOG0156 Cytochrome P450 CYP2 subfamily	N/A	IPR002401; Cytochrome P450, E-class, group I
HLJ619_peak_190	190	tig00006902	1269887	1270990	1104	*	Cor0081780.1	3.23064	Promoter (<=1kb)	-2.7636	2.35407e-141	down	#N/A	#N/A	#N/A	#N/A	#N/A	#N/A	#N/A	#N/A	#N/A
HLJ619_peak_195	195	tig00006904	176139	176766	628	*	Cor0200480.1	4.84595	Promoter (<=1kb)	-1.60532	1.65982e-28	down	K00083//cinnamyl-alcohol dehydrogenase [EC:1.1.1.195]	GO:0055114//biological_process oxidation-reduction process;GO:0016491//molecular_function oxidoreductase activity	unnamed protein product, partial [Vitis vinifera]	Uncharacterized protein {ECO:0000313|EMBL:CBI34634.3} OS=Vitis vinifera (Grape) OrderedLocusNames=VIT_02s0025g03100 {ECO:0000313|EMBL:CBI34634.3} PE=3	Probable cinnamyl alcohol dehydrogenase 1 Short=AtCAD1 EC=1.1.1.195 OS=Arabidopsis thaliana (Mouse-ear cress) ORFNames=F28P22.13 PE=2	Zinc-binding dehydrogenase	[Q] KOG0023 Alcohol dehydrogenase, class V	N/A	IPR020843; Polyketide synthase, enoylreductase domain
HLJ619_peak_198	198	tig00006905	120769	121414	646	*	Cor0213060.1	3.70627	Intron (Cor0213050.1/Cor0213050, intron 16 of 16)	-1.96857	1.07821e-29	down	N/A	GO:0004869//molecular_function cysteine-type endopeptidase inhibitor activity	PREDICTED: cysteine proteinase inhibitor 5 [Juglans regia]	Cysteine proteinase inhibitor {ECO:0000256|RuleBase:RU362130} OS=Juglans regia (English walnut) Name=LOC109004561 {ECO:0000313|RefSeq:XP_018838679.1} PE=3	Cysteine proteinase inhibitor 5 Short=AtCYS-5 Precursor OS=Arabidopsis thaliana (Mouse-ear cress) Name=CYS5 OrderedLocusNames=At5g47550 ORFNames=MNJ7.14 PE=2	Aspartic acid proteinase inhibitor	[O] LSE0450 A Cysteine proteinase inhibitor B (cystatin B)	N/A	IPR027214; Cystatin
HLJ619_peak_200	200	tig00006906	247717	248061	345	*	Cor0190820.1	3.34622	Intron (Cor0190820.1/Cor0190820, intron 18 of 25)	-2.28543	0	down	N/A	GO:0005515//molecular_function protein binding;GO:0004672//molecular_function protein kinase activity;GO:0005524//molecular_function ATP binding;GO:0006468//biological_process protein phosphorylation	PREDICTED: probable leucine-rich repeat receptor-like serine/threonine-protein kinase At3g14840 isoform X1 [Juglans regia] >XP_018848964.1 PREDICTED: probable leucine-rich repeat receptor-like serine/threonine-protein kinase At3g14840 isoform X1 [Juglans regia]	probable leucine-rich repeat receptor-like serine/threonine-protein kinase At3g14840 isoform X1 {ECO:0000313|RefSeq:XP_018848958.1, ECO:0000313|RefSeq:XP_018848964.1} OS=Juglans regia (English walnut) ECO:0000313|RefSeq:XP_018848964.1} PE=4	Probable leucine-rich repeat receptor-like serine/threonine-protein kinase At3g14840 EC=2.7.11.1 Precursor OS=Arabidopsis thaliana (Mouse-ear cress) Name=LRR-RLK OrderedLocusNames=At3g14840 ORFNames=T21E2.2 PE=1	Di-glucose binding within endoplasmic reticulum	[T] LSE0002 A Receptor protein kinase containing LRR repeats	N/A	IPR021720; Malectin
HLJ619_peak_201	201	tig00006906	337847	338809	963	*	Cor0190830.1	3.34622	Intron (Cor0190820.1/Cor0190820, intron 20 of 25)	-4.25522	4.08273e-12	down	N/A	GO:0004672//molecular_function protein kinase activity;GO:0005524//molecular_function ATP binding;GO:0006468//biological_process protein phosphorylation;GO:0005515//molecular_function protein binding	PREDICTED: probable leucine-rich repeat receptor-like serine/threonine-protein kinase At3g14840 isoform X1 [Juglans regia] >XP_018848964.1 PREDICTED: probable leucine-rich repeat receptor-like serine/threonine-protein kinase At3g14840 isoform X1 [Juglans regia]	probable leucine-rich repeat receptor-like serine/threonine-protein kinase At3g14840 isoform X1 {ECO:0000313|RefSeq:XP_018848958.1, ECO:0000313|RefSeq:XP_018848964.1} OS=Juglans regia (English walnut) ECO:0000313|RefSeq:XP_018848964.1} PE=4	Probable leucine-rich repeat receptor-like serine/threonine-protein kinase At3g14840 EC=2.7.11.1 Precursor OS=Arabidopsis thaliana (Mouse-ear cress) Name=LRR-RLK OrderedLocusNames=At3g14840 ORFNames=T21E2.2 PE=1	Di-glucose binding within endoplasmic reticulum	[T] LSE0002 A Receptor protein kinase containing LRR repeats	N/A	IPR021720; Malectin
HLJ619_peak_203	203	tig00006906	464059	464400	342	*	Cor0190850.1	3.26555	Distal Intergenic	-4.88732	0.0331038	down	K01213//galacturan 1,4-alpha-galacturonidase [EC:3.2.1.67]	GO:0004650//molecular_function polygalacturonase activity;GO:0005975//biological_process carbohydrate metabolic process	PREDICTED: exopolygalacturonase-like [Juglans regia]	exopolygalacturonase-like {ECO:0000313|RefSeq:XP_018824994.1} OS=Juglans regia (English walnut) Name=LOC108994310 {ECO:0000313|RefSeq:XP_018824994.1} PE=3	Exopolygalacturonase EC=3.2.1.67 Pollen allergen Pla a 2 Precursor; Fragment OS=Platanus acerifolia (London plane tree) Name=plaa2 {ECO:0000312|EMBL:CAE52833.1} PE=1	Glycosyl hydrolases family 28	[R] TWOG0115 Endo-polygalacturonase	N/A	IPR006626; Parallel beta-helix repeat
HLJ619_peak_205	205	tig00006913	875780	876316	537	*	Cor0165020.1	4.11307	Exon (Cor0165010.1/Cor0165010, exon 12 of 19)	-1.18881	9.66711e-110	down	N/A	GO:0005524//molecular_function ATP binding;GO:0016021//cellular_component integral component of membrane;GO:0042626//molecular_function ATPase activity, coupled to transmembrane movement of substances;GO:0055085//biological_process transmembrane transport	ABC transporter C family member 2 [Morus notabilis] >EXC25625.1 ABC transporter C family member 2 [Morus notabilis]	ABC transporter C family member 2 {ECO:0000313|EMBL:EXC25625.1} OS=Morus notabilis ORFNames=L484_009930 {ECO:0000313|EMBL:EXC25625.1} PE=4	ABC transporter C family member 2 Short=ABC transporter ABCC.2 Short=AtABCC2 EC=7.6.2.2 ATP-energized glutathione S-conjugate pump 2 Glutathione S-conjugate-transporting ATPase 2 Multidrug resistance-associated protein 2 OS=Arabidopsis thaliana (Mouse-ear cress) ORFNames=T29F13.13 PE=1	ABC transporter transmembrane region	[Q] KOG0054 Multidrug resistance-associated protein/mitoxantrone resistance protein, ABC superfamily	N/A	IPR011527; ABC transporter type 1, transmembrane domain
HLJ619_peak_215	215	tig00006925	32656	33256	601	*	Cor0043960.1	3.98579	Distal Intergenic	-1.0187	2.08602e-14	down	N/A	N/A	PREDICTED: uncharacterized protein LOC109002113 [Juglans regia]	Uncharacterized protein {ECO:0000313|EMBL:SPD19508.1} OS=Fagus sylvatica (Beechnut) ORFNames=FSB_LOCUS47390 {ECO:0000313|EMBL:SPD19508.1} PE=4	N/A	Senescence regulator	[X] LSE1217 A Unnamed protein	N/A	IPR007608; Senescence regulator S40
HLJ619_peak_232	232	tig00006927	1443638	1444466	829	*	Cor0096530.1	3.65488	Promoter (2-3kb)	-2.12256	0	down	K05658//ATP-binding cassette, subfamily B (MDR/TAP), member 1 [EC:3.6.3.44]	GO:0005524//molecular_function ATP binding;GO:0016887//molecular_function ATPase activity;GO:0016021//cellular_component integral component of membrane;GO:0042626//molecular_function ATPase activity, coupled to transmembrane movement of substances;GO:0055085//biological_process transmembrane transport	PREDICTED: ABC transporter B family member 11-like [Juglans regia] >XP_018810976.1 PREDICTED: ABC transporter B family member 11-like [Juglans regia]	Uncharacterized protein {ECO:0000313|EMBL:SPD09283.1} OS=Fagus sylvatica (Beechnut) ORFNames=FSB_LOCUS37165 {ECO:0000313|EMBL:SPD09283.1} PE=4	ABC transporter B family member 11 Short=ABC transporter ABCB.11 Short=AtABCB11 Multidrug resistance protein 8 P-glycoprotein 11 OS=Arabidopsis thaliana (Mouse-ear cress) ORFNames=T14P4.15 PE=2	ABC transporter transmembrane region	[Q] KOG0055 Multidrug/pheromone exporter, ABC superfamily	N/A	IPR011527; ABC transporter type 1, transmembrane domain
HLJ619_peak_236	236	tig00006931	549707	550328	622	*	Cor0135280.1	3.80755	Promoter (2-3kb)	-1.74588	5.69369e-45	down	N/A	N/A	PREDICTED: caffeoylshikimate esterase-like [Juglans regia]	caffeoylshikimate esterase-like {ECO:0000313|RefSeq:XP_018815188.1} OS=Juglans regia (English walnut) Name=LOC108986861 {ECO:0000313|RefSeq:XP_018815188.1} PE=4	Caffeoylshikimate esterase EC=3.1.1.- Lysophospholipase 2 Short=LysoPL2 OS=Arabidopsis thaliana (Mouse-ear cress) Name=CSE OrderedLocusNames=At1g52760 ORFNames=F14G24.3 PE=1	Serine aminopeptidase, S33	[I] KOG1455 Lysophospholipase	N/A	IPR022742; Serine aminopeptidase, S33
HLJ619_peak_237	237	tig00006931	574531	575312	782	*	Cor0135310.1	3.94475	Downstream (2-3kb)	-4.82613	0.0453541	down	N/A	GO:0004857//molecular_function enzyme inhibitor activity	hypothetical protein POPTR_0014s12390g [Populus trichocarpa] >PNT04536.1 hypothetical protein POPTR_014G129400v3 [Populus trichocarpa]	Uncharacterized protein {ECO:0000313|EMBL:SPC89259.1} OS=Fagus sylvatica (Beechnut) ORFNames=FSB_LOCUS17141 {ECO:0000313|EMBL:SPC89259.1} PE=4	Pectinesterase inhibitor 6 {ECO:0000305} Pectin methylesterase inhibitor 6 {ECO:0000303|PubMed:23362209} Short=AtPMEI6 {ECO:0000305} Precursor OS=Arabidopsis thaliana (Mouse-ear cress) OrderedLocusNames=At2g47670 {ECO:0000312|Araport:AT2G47670} PE=2	Plant invertase/pectin methylesterase inhibitor	[R] LSE0026 A Ripening-related protein	N/A	IPR006501; Pectinesterase inhibitor domain
HLJ619_peak_240	240	tig00006931	801992	802526	535	*	Cor0135530.1	6.24729	Promoter (<=1kb)	-1.21079	0.00110515	down	N/A	N/A	PREDICTED: uncharacterized protein LOC108980794 [Juglans regia]	Uncharacterized protein {ECO:0000313|EMBL:PON98699.1} OS=Trema orientale (Charcoal tree) (Celtis orientalis) ORFNames=TorRG33x02_055990 {ECO:0000313|EMBL:PON98699.1} PE=4	N/A	Domain of unknown function (DUF2828)	[X] LSE1376 A Unnamed protein	N/A	IPR024553; Domain of unknown function DUF2828
HLJ619_peak_242	242	tig00006933	343271	343864	594	*	Cor0179200.1	3.33612	Distal Intergenic	-1.19445	2.54866e-21	down	K11816//indole-3-pyruvate monooxygenase [EC:1.14.13.168]	GO:0016491//molecular_function oxidoreductase activity;GO:0055114//biological_process oxidation-reduction process	PREDICTED: probable indole-3-pyruvate monooxygenase YUCCA10 [Juglans regia]	Uncharacterized protein {ECO:0000313|EMBL:SPD02684.1} OS=Fagus sylvatica (Beechnut) ORFNames=FSB_LOCUS30566 {ECO:0000313|EMBL:SPD02684.1} PE=4	Probable indole-3-pyruvate monooxygenase YUCCA10 EC=1.14.13.168 Flavin-containing monooxygenase YUCCA10 OS=Arabidopsis thaliana (Mouse-ear cress) ORFNames=F27K7.7 PE=2	Pyridine nucleotide-disulphide oxidoreductase	[Q] KOG1399 Flavin-containing monooxygenase	N/A	IPR000103; Pyridine nucleotide-disulphide oxidoreductase, class-II
HLJ619_peak_247	247	tig00006935	473081	473412	332	*	Cor0159790.1	3.21193	Distal Intergenic	-1.00246	1.0209e-12	down	N/A	GO:0003824//molecular_function catalytic activity;GO:0009058//biological_process biosynthetic process	PREDICTED: uncharacterized protein LOC108979494 [Juglans regia]	uncharacterized protein LOC108979494 {ECO:0000313|RefSeq:XP_018805726.1} OS=Juglans regia (English walnut) Name=LOC108979494 {ECO:0000313|RefSeq:XP_018805726.1} PE=4	N/A	Phenazine biosynthesis-like protein	[R] KOG3033 Predicted PhzC/PhzF-type epimerase	N/A	IPR003719; Phenazine biosynthesis PhzF protein
HLJ619_peak_255	255	tig00006938	75486	75928	443	*	Cor0206740.1	3.34622	Distal Intergenic	-2.84367	0	down	N/A	GO:0051513//biological_process regulation of monopolar cell growth	PREDICTED: protein LONGIFOLIA 1 [Juglans regia]	protein LONGIFOLIA 1 {ECO:0000313|RefSeq:XP_018856552.1} OS=Juglans regia (English walnut) Name=LOC109018819 {ECO:0000313|RefSeq:XP_018856552.1} PE=4	Protein LONGIFOLIA 1 Protein TON1 RECRUITING MOTIF 2 OS=Arabidopsis thaliana (Mouse-ear cress) ORFNames=T20K14.190 PE=1	Domain of unknown function (DUF4378)	[X] LSE1460 A Unnamed protein	N/A	IPR033334; Protein LONGIFOLIA 1/2
HLJ619_peak_256	256	tig00006938	154288	154742	455	*	Cor0206770.1	3.62777	Downstream (1-2kb)	-1.57376	1.6518e-146	down	N/A	GO:0004672//molecular_function protein kinase activity;GO:0005524//molecular_function ATP binding;GO:0006468//biological_process protein phosphorylation	PREDICTED: probably inactive leucine-rich repeat receptor-like protein kinase At5g48380 [Juglans regia]	Uncharacterized protein {ECO:0000313|EMBL:SPC74037.1} OS=Fagus sylvatica (Beechnut) {ECO:0000313|EMBL:SPD01005.1} PE=4	Probably inactive leucine-rich repeat receptor-like protein kinase At5g48380 Precursor OS=Arabidopsis thaliana (Mouse-ear cress) OrderedLocusNames=At5g48380 ORFNames=K23F3.10, MJE7.1 PE=1	Protein tyrosine kinase	[T] LSE0002 A Receptor protein kinase containing LRR repeats	N/A	IPR013210; Leucine-rich repeat-containing N-terminal, plant-type
HLJ619_peak_263	263	tig00006941	473139	473913	775	*	Cor0186400.1	3.34622	Promoter (<=1kb)	-1.06706	4.14345e-15	down	K18789//xylogalacturonan beta-1,3-xylosyltransferase [EC:2.4.2.41]	GO:0006486//biological_process protein glycosylation;GO:0016757//molecular_function transferase activity, transferring glycosyl groups	PREDICTED: probable glycosyltransferase At5g20260 [Juglans regia]	probable glycosyltransferase At5g20260 {ECO:0000313|RefSeq:XP_018824148.1} OS=Juglans regia (English walnut) Name=LOC108993624 {ECO:0000313|RefSeq:XP_018824148.1} PE=3	Probable glycosyltransferase At5g20260 EC=2.4.-.- OS=Arabidopsis thaliana (Mouse-ear cress) OrderedLocusNames=At5g20260 ORFNames=F5O24.150 PE=3	Exostosin family	[GMW] KOG1021 Acetylglucosaminyltransferase EXT1/exostosin 1	N/A	IPR004263; Exostosin-like
HLJ619_peak_266	266	tig00006943	179329	179777	449	*	Cor0066180.1	3.34622	Distal Intergenic	-2.07643	2.73073e-89	down	K18121//glyoxylate/succinic semialdehyde reductase [EC:1.1.1.79 1.1.1.-]	GO:0004616//molecular_function phosphogluconate dehydrogenase (decarboxylating) activity;GO:0055114//biological_process oxidation-reduction process;GO:0051287//molecular_function NAD binding	PREDICTED: glyoxylate/succinic semialdehyde reductase 1 isoform X1 [Juglans regia] >XP_018820891.1 PREDICTED: glyoxylate/succinic semialdehyde reductase 1 isoform X1 [Juglans regia] >XP_018820898.1 PREDICTED: glyoxylate/succinic semialdehyde reductase 1 isoform X1 [Juglans regia] >XP_018820904.1 PREDICTED: glyoxylate/succinic semialdehyde reductase 1 isoform X2 [Juglans regia] >XP_018820911.1 PRE…	glyoxylate/succinic semialdehyde reductase 1 isoform X1 {ECO:0000313|RefSeq:XP_018820882.1, ECO:0000313|RefSeq:XP_018820891.1, ECO:0000313|RefSeq:XP_018820898.1} glyoxylate/succinic semialdehyde reductase 1 isoform X2 {ECO:0000313|RefSeq:XP_018820904.1, ECO:0000313|RefSeq:XP_018820911.1} OS=Juglans regia (English walnut) ECO:0000313|RefSeq:XP_018820904.1, ECO:0000313|RefSeq:XP_018820911.1} PE=4	Glyoxylate/succinic semialdehyde reductase 1 Short=AtGLYR1 Short=AtGR1 Short=SSA reductase 1 EC=1.1.1.79 {ECO:0000269|Ref.7, ECO:0000269|Ref.8} EC=1.1.1.n11 {ECO:0000269|Ref.7, ECO:0000269|Ref.8} Gamma-hydroxybutyrate dehydrogenase {ECO:0000303|PubMed:12882961} Short=AtGHBDH OS=Arabidopsis thaliana (Mouse-ear cress) ORFNames=MWL2.18 PE=1	NAD-binding of NADP-dependent 3-hydroxyisobutyrate dehydrogenase	[R] KOG0409 Predicted dehydrogenase	N/A	IPR029154; 3-hydroxyisobutyrate dehydrogenase, NAD-binding domain
HLJ619_peak_277	277	tig00006945	249532	249936	405	*	Cor0124880.1	3.92455	Exon (Cor0124880.1/Cor0124880, exon 2 of 4)	-1.22614	1.57167e-39	down	N/A	GO:0043531//molecular_function ADP binding	PREDICTED: uncharacterized protein LOC108989247 [Juglans regia] >XP_018818338.1 PREDICTED: uncharacterized protein LOC108989247 [Juglans regia]	uncharacterized protein LOC108989247 {ECO:0000313|RefSeq:XP_018818337.1, ECO:0000313|RefSeq:XP_018818338.1} OS=Juglans regia (English walnut) ECO:0000313|RefSeq:XP_018818338.1} PE=3	Disease resistance protein At4g27190 OS=Arabidopsis thaliana (Mouse-ear cress) OrderedLocusNames=At4g27190 ORFNames=T24A18.140 PE=2	NB-ARC domain	[T] KOG4658 Apoptotic ATPase	N/A	IPR002182; NB-ARC
HLJ619_peak_279	279	tig00006945	778822	779292	471	*	Cor0125270.1	3.13474	Exon (Cor0125270.1/Cor0125270, exon 9 of 14)	-1.53418	7.30807e-34	down	K14724//solute carrier family 9 (sodium/hydrogen exchanger), member 8	GO:0006812//biological_process cation transport;GO:0015299//molecular_function solute:proton antiporter activity;GO:0016021//cellular_component integral component of membrane;GO:0055085//biological_process transmembrane transport;GO:0006814//biological_process sodium ion transport;GO:0006885//biological_process regulation of pH;GO:0015385//molecular_function sodium:proton antiporter activity	PREDICTED: sodium/hydrogen exchanger 1-like [Juglans regia]	Sodium/hydrogen exchanger {ECO:0000256|RuleBase:RU003722} OS=Juglans regia (English walnut) Name=LOC108988829 {ECO:0000313|RefSeq:XP_018817745.1} PE=3	Sodium/hydrogen exchanger 2 Na(+)/H(+) exchanger 2 Short=NHE-2 OS=Arabidopsis thaliana (Mouse-ear cress) Name=NHX2 OrderedLocusNames=At3g05030 ORFNames=T9J14.2 PE=2	Sodium/hydrogen exchanger family	[P] KOG1965 Sodium/hydrogen exchanger protein	N/A	IPR018422; Cation/H+ exchanger, CPA1 family
HLJ619_peak_281	281	tig00006945	1447192	1447683	492	*	Cor0125880.1	4.18277	Distal Intergenic	-1.16487	1.31111e-103	down	K15718//linoleate 9S-lipoxygenase [EC:1.13.11.58]	GO:0005515//molecular_function protein binding;GO:0016491//molecular_function oxidoreductase activity;GO:0055114//biological_process oxidation-reduction process;GO:0016702//molecular_function oxidoreductase activity, acting on single donors with incorporation of molecular oxygen, incorporation of two atoms of oxygen;GO:0046872//molecular_function metal ion binding	PREDICTED: probable linoleate 9S-lipoxygenase 5 [Juglans regia]	Lipoxygenase {ECO:0000256|RuleBase:RU003975} EC=1.13.11.- {ECO:0000256|RuleBase:RU003975} OS=Juglans regia (English walnut) Name=LOC109008077 {ECO:0000313|RefSeq:XP_018843575.1} PE=3	Probable linoleate 9S-lipoxygenase 5 EC=1.13.11.58 Leaf lipoxygenase OS=Solanum tuberosum (Potato) Name=LOX1.5 Synonyms=POTLX-3 PE=2	PLAT/LH2 domain	[I] TWOG0111 Lipoxygenase	N/A	IPR013819; Lipoxygenase, C-terminal
HLJ619_peak_284	284	tig00006947	533817	534166	350	*	Cor0172920.1	3.16068	Promoter (1-2kb)	-1.27699	3.21826e-70	down	N/A	N/A	hypothetical protein CCACVL1_04814 [Corchorus capsularis]	Uncharacterized protein {ECO:0000313|EMBL:OMO96711.1} OS=Corchorus capsularis (Jute) ORFNames=CCACVL1_04814 {ECO:0000313|EMBL:OMO96711.1} PE=4	DnaJ protein P58IPK homolog B {ECO:0000305} Short=OsP58B {ECO:0000303|PubMed:24153418} Chaperone protein dnaJ C15 {ECO:0000305} Short=OsDjC15 {ECO:0000303|PubMed:23160806} Precursor OS=Oryza sativa subsp. japonica (Rice) ORFNames=P0020E09.19 {ECO:0000312|EMBL:BAD87042.1} PE=1	DnaJ domain	[O] KOG0714 Molecular chaperone (DnaJ superfamily)	N/A	IPR001623; DnaJ domain
HLJ619_peak_290	290	tig00006949	627904	628251	348	*	Cor0063920.1	3.71034	Promoter (2-3kb)	-2.59852	9.71408e-282	down	K08235//xyloglucan:xyloglucosyl transferase [EC:2.4.1.207]	GO:0004553//molecular_function hydrolase activity, hydrolyzing O-glycosyl compounds;GO:0005975//biological_process carbohydrate metabolic process;GO:0005618//cellular_component cell wall;GO:0006073//biological_process cellular glucan metabolic process;GO:0016762//molecular_function xyloglucan:xyloglucosyl transferase activity;GO:0048046//cellular_component apoplast	PREDICTED: probable xyloglucan endotransglucosylase/hydrolase protein 6 [Juglans regia]	Xyloglucan endotransglucosylase/hydrolase {ECO:0000256|RuleBase:RU361120} EC=2.4.1.207 {ECO:0000256|RuleBase:RU361120} OS=Fagus sylvatica (Beechnut) ORFNames=FSB_LOCUS60995 {ECO:0000313|EMBL:SPD33113.1} PE=3	Probable xyloglucan endotransglucosylase/hydrolase protein 7 Short=At-XTH7 Short=XTH-7 EC=2.4.1.207 Precursor OS=Arabidopsis thaliana (Mouse-ear cress) ORFNames=T28I19.80 PE=2	Xyloglucan endo-transglycosylase (XET) C-terminus	[M] TWOG0096 Xyloglucan endotransglycosylase	N/A	IPR010713; Xyloglucan endo-transglycosylase, C-terminal
HLJ619_peak_292	292	tig00006949	1528530	1528940	411	*	Cor0064570.1	3.23852	Promoter (2-3kb)	-1.33964	1.44093e-13	down	#N/A	#N/A	#N/A	#N/A	#N/A	#N/A	#N/A	#N/A	#N/A
HLJ619_peak_293	293	tig00006949	1896016	1896419	404	*	Cor0064980.1	3.60176	Promoter (<=1kb)	-3.49739	1.72088e-95	down	K08900//mitochondrial chaperone BCS1	GO:0005524//molecular_function ATP binding	PREDICTED: protein HYPER-SENSITIVITY-RELATED 4-like [Juglans regia]	Uncharacterized protein {ECO:0000313|EMBL:SPD01723.1} OS=Fagus sylvatica (Beechnut) ORFNames=FSB_LOCUS29605 {ECO:0000313|EMBL:SPD01723.1} PE=3	Protein HYPER-SENSITIVITY-RELATED 4 {ECO:0000303|PubMed:15181213} Short=AtHSR4 {ECO:0000303|PubMed:15181213} EC=3.6.1.3 {ECO:0000250|UniProtKB:Q9FLD5} BCS1-like protein OS=Arabidopsis thaliana (Mouse-ear cress) ORFNames=F18B3.210 {ECO:0000312|EMBL:CAB42922.1} PE=2	ATPase family associated with various cellular activities (AAA)	[O] KOG0743 AAA+-type ATPase	N/A	IPR003959; ATPase, AAA-type, core
HLJ619_peak_296	296	tig00006949	2523485	2523935	451	*	Cor0065810.1	3.60106	Promoter (<=1kb)	-1.19568	2.06073e-91	down	K08874//transformation/transcription domain-associated protein	GO:0005515//molecular_function protein binding;GO:0016301//molecular_function kinase activity;GO:0000123//cellular_component histone acetyltransferase complex;GO:0005634//cellular_component nucleus;GO:0016573//biological_process histone acetylation	PREDICTED: transformation/transcription domain-associated protein-like isoform X1 [Juglans regia]	transformation/transcription domain-associated protein-like isoform X1 {ECO:0000313|RefSeq:XP_018829575.1} OS=Juglans regia (English walnut) Name=LOC108997673 {ECO:0000313|RefSeq:XP_018829575.1} PE=3	N/A	FAT domain	[TBLD] KOG0889 Histone acetyltransferase SAGA, TRRAP/TRA1 component, PI-3 kinase superfamily	N/A	IPR033317; Transcription-associated protein 1
HLJ619_peak_300	300	tig00006951	289767	290169	403	*	Cor0201040.1	3.16068	Promoter (2-3kb)	-1.12612	1.61696e-26	down	K08999//uncharacterized protein	GO:0004518//molecular_function nuclease activity	PREDICTED: bifunctional nuclease 2 isoform X1 [Juglans regia] >XP_018840908.1 PREDICTED: bifunctional nuclease 2 isoform X2 [Juglans regia] >XP_018840909.1 PREDICTED: bifunctional nuclease 2 isoform X3 [Juglans regia]	bifunctional nuclease 2 isoform X1 {ECO:0000313|RefSeq:XP_018840907.1} bifunctional nuclease 2 isoform X2 {ECO:0000313|RefSeq:XP_018840908.1} bifunctional nuclease 2 isoform X3 {ECO:0000313|RefSeq:XP_018840909.1} OS=Juglans regia (English walnut) ECO:0000313|RefSeq:XP_018840908.1, ECO:0000313|RefSeq:XP_018840909.1} PE=4	Bifunctional nuclease 2 Short=AtBBD2 EC=3.1.-.- OS=Arabidopsis thaliana (Mouse-ear cress) Name=BBD2 OrderedLocusNames=At1g19660 ORFNames=F14P1.1 PE=2	Bifunctional nuclease	[X] LSE1470 A Unnamed protein	N/A	IPR003729; Bifunctional nuclease domain
HLJ619_peak_302	302	tig00006953	89084	89409	326	*	Cor0204530.1	4.60568	Promoter (1-2kb)	-3.48415	0	down	K07088//uncharacterized protein	GO:0016021//cellular_component integral component of membrane;GO:0055085//biological_process transmembrane transport	PREDICTED: protein PIN-LIKES 7-like [Juglans regia]	Uncharacterized protein {ECO:0000313|EMBL:SPC84608.1} OS=Fagus sylvatica (Beechnut) ORFNames=FSB_LOCUS12490 {ECO:0000313|EMBL:SPC84608.1} PE=4	Protein PIN-LIKES 7 {ECO:0000303|PubMed:22504182} Auxin efflux carrier-like protein 7 {ECO:0000303|PubMed:22504182} OS=Arabidopsis thaliana (Mouse-ear cress) ORFNames=K2A18.4 {ECO:0000312|EMBL:BAB10403.1} PE=2	Membrane transport protein	[S] KOG2722 Predicted membrane protein	N/A	IPR004776; Membrane transport protein
HLJ619_peak_309	309	tig00006954	683792	684204	413	*	Cor0156080.1	3.84384	Promoter (<=1kb)	-2.21262	3.86372e-167	down	K10406//kinesin family member C2/C3	GO:0005515//molecular_function protein binding;GO:0003777//molecular_function microtubule motor activity;GO:0005524//molecular_function ATP binding;GO:0007018//biological_process microtubule-based movement;GO:0008017//molecular_function microtubule binding	PREDICTED: kinesin KP1 [Juglans regia]	kinesin KP1 {ECO:0000313|RefSeq:XP_018813604.1} OS=Juglans regia (English walnut) Name=LOC108985676 {ECO:0000313|RefSeq:XP_018813604.1} PE=3	Kinesin-like protein KIN-14F {ECO:0000305} AtKIN14h Kinesin KP1 {ECO:0000303|PubMed:21406623} Kinesin-like protein 1 {ECO:0000303|PubMed:16212879} Short=AtKP1 {ECO:0000303|PubMed:16212879} OS=Arabidopsis thaliana (Mouse-ear cress) ORFNames=T32N15.10 {ECO:0000312|EMBL:AAB70034.1} PE=1	Kinesin motor domain	[Z] KOG0239 Kinesin (KAR3 subfamily)	N/A	IPR027640; Kinesin-like protein
HLJ619_peak_311	311	tig00006956	93081	93408	328	*	Cor0162530.1	3.25724	Distal Intergenic	-3.15903	7.61028e-06	down	N/A	GO:0005524//molecular_function ATP binding;GO:0016887//molecular_function ATPase activity;GO:0016021//cellular_component integral component of membrane;GO:0042626//molecular_function ATPase activity, coupled to transmembrane movement of substances;GO:0055085//biological_process transmembrane transport	PREDICTED: ABC transporter C family member 3 [Juglans regia]	ABC transporter C family member 3 {ECO:0000313|RefSeq:XP_018812887.1} OS=Juglans regia (English walnut) Name=LOC108985153 {ECO:0000313|RefSeq:XP_018812887.1} PE=4	ABC transporter C family member 3 Short=ABC transporter ABCC.3 Short=AtABCC3 EC=7.6.2.2 ATP-energized glutathione S-conjugate pump 3 Glutathione S-conjugate-transporting ATPase 3 Multidrug resistance-associated protein 3 OS=Arabidopsis thaliana (Mouse-ear cress) ORFNames=MJG19.3 PE=1	ABC transporter	[Q] KOG0054 Multidrug resistance-associated protein/mitoxantrone resistance protein, ABC superfamily	N/A	IPR011527; ABC transporter type 1, transmembrane domain
HLJ619_peak_312	312	tig00006958	67638	68128	491	*	Cor0212450.1	3.92857	Promoter (2-3kb)	-1.37325	8.79633e-62	down	K09422//myb proto-oncogene protein, plant	N/A	PREDICTED: transcription factor MYB86 [Juglans regia]	transcription factor MYB86 {ECO:0000313|RefSeq:XP_018811701.1} OS=Juglans regia (English walnut) Name=LOC108984259 {ECO:0000313|RefSeq:XP_018811701.1} PE=4	Transcription factor MYB97 {ECO:0000303|PubMed:11597504} Myb-related protein 97 {ECO:0000303|PubMed:11597504} Short=AtMYB97 {ECO:0000303|PubMed:11597504} OS=Arabidopsis thaliana (Mouse-ear cress) ORFNames=F10M23.270 {ECO:0000312|EMBL:CAB36539.1} PE=2	Myb-like DNA-binding domain	[K] KOG0048 Transcription factor, Myb superfamily	http://plntfdb.bio.uni-potsdam.de/v3.0/fam_mem.php?family_id=MYB-related	IPR017930; Myb domain
HLJ619_peak_313	313	tig00006958	132952	133882	931	*	Cor0212480.1	3.22893	Promoter (1-2kb)	-3.31165	1.95433e-36	down	K13789//geranylgeranyl diphosphate synthase, type II [EC:2.5.1.1 2.5.1.10 2.5.1.29]	GO:0008299//biological_process isoprenoid biosynthetic process	PREDICTED: heterodimeric geranylgeranyl pyrophosphate synthase small subunit, chloroplastic-like [Juglans regia]	Uncharacterized protein {ECO:0000313|EMBL:SPC83270.1} OS=Fagus sylvatica (Beechnut) ORFNames=FSB_LOCUS11152 {ECO:0000313|EMBL:SPC83270.1} PE=3	Heterodimeric geranylgeranyl pyrophosphate synthase large subunit 1, chloroplastic Short=GGPP synthase 1 Short=GGPS1 EC=2.5.1.- (2E,6E)-farnesyl diphosphate synthase 1 Dimethylallyltranstransferase 1 EC=2.5.1.1 Farnesyl diphosphate synthase 1 Farnesyltranstransferase 1 EC=2.5.1.29 Geranyltranstransferase 1 EC=2.5.1.10 Precursor OS=Arabidopsis thaliana (Mouse-ear cress) ORFNames=C7A10.550 PE=1	Polyprenyl synthetase	[H] KOG0776 Geranylgeranyl pyrophosphate synthase/Polyprenyl synthetase	N/A	IPR000092; Polyprenyl synthetase
HLJ619_peak_318	318	tig00006961	130293	131072	780	*	Cor0205060.1	3.98223	Promoter (<=1kb)	-1.12242	1.50439e-14	down	K13648//alpha-1,4-galacturonosyltransferase [EC:2.4.1.43]	GO:0016757//molecular_function transferase activity, transferring glycosyl groups;GO:0047262//molecular_function polygalacturonate 4-alpha-galacturonosyltransferase activity	fragile fiber [Betula platyphylla]	Hexosyltransferase {ECO:0000256|RuleBase:RU362027} EC=2.4.1.- {ECO:0000256|RuleBase:RU362027} OS=Betula platyphylla (Asian white birch) Name=FRA {ECO:0000313|EMBL:ANB66372.1} PE=2	Probable galacturonosyltransferase 12 EC=2.4.1.- Like glycosyl transferase 6 Protein IRREGULAR XYLEM 8 OS=Arabidopsis thaliana (Mouse-ear cress) ORFNames=K5F14.3 PE=2	Glycosyl transferase family 8	[S] LSE0371 A Predicted glycosyltransferase	N/A	IPR029993; Plant galacturonosyltransferase GAUT
HLJ619_peak_321	321	tig00006967	405204	405656	453	*	Cor0111470.1	3.18283	Promoter (<=1kb)	-6.27551	0.000202899	down	N/A	N/A	uncharacterized protein LOC110668302 [Hevea brasiliensis]	Uncharacterized protein {ECO:0000313|EMBL:SPD21552.1} OS=Fagus sylvatica (Beechnut) ORFNames=FSB_LOCUS49434 {ECO:0000313|EMBL:SPD21552.1} PE=4	N/A	N/A	N/A	N/A	N/A
HLJ619_peak_322	322	tig00006967	522364	522782	419	*	Cor0111560.1	3.75163	Intron (Cor0111550.1/Cor0111550, intron 5 of 6)	-2.03253	8.65331e-106	down	N/A	N/A	Serine-rich protein-related [Theobroma cacao]	Serine-rich protein-related {ECO:0000313|EMBL:EOY31261.1} OS=Theobroma cacao (Cacao) (Cocoa) ORFNames=TCM_038231 {ECO:0000313|EMBL:EOY31261.1} PE=4	N/A	N/A	[X] LSE1268 A Unnamed protein	N/A	N/A
HLJ619_peak_324	324	tig00006969	138837	139294	458	*	Cor0167910.1	3.30911	Distal Intergenic	-1.6515	2.79509e-47	down	N/A	GO:0051260//biological_process protein homooligomerization;GO:0005515//molecular_function protein binding	PREDICTED: BTB/POZ domain-containing protein At2g24240-like [Juglans regia]	Uncharacterized protein {ECO:0000313|EMBL:SPC91709.1} OS=Fagus sylvatica (Beechnut) ORFNames=FSB_LOCUS19591 {ECO:0000313|EMBL:SPC91709.1} PE=4	BTB/POZ domain-containing protein At2g24240 OS=Arabidopsis thaliana (Mouse-ear cress) OrderedLocusNames=At2g24240 ORFNames=F27D4.15 PE=2	BTB/POZ domain	[R] KOG2714 SETA binding protein SB1 and related proteins, contain BTB/POZ domain	N/A	IPR003131; Potassium channel tetramerisation-type BTB domain
HLJ619_peak_331	331	tig00006973	1539471	1539821	351	*	Cor0039180.1	3.15661	Distal Intergenic	-3.30871	1.90739e-194	down	N/A	GO:0004672//molecular_function protein kinase activity;GO:0005524//molecular_function ATP binding;GO:0006468//biological_process protein phosphorylation;GO:0005515//molecular_function protein binding	PREDICTED: receptor-like protein kinase HAIKU2 [Juglans regia]	receptor-like protein kinase HAIKU2 {ECO:0000313|RefSeq:XP_018808617.1} OS=Juglans regia (English walnut) Name=LOC108981822 {ECO:0000313|RefSeq:XP_018808617.1} PE=3	Receptor-like protein kinase 7 {ECO:0000303|PubMed:20811905} EC=2.7.11.1 {ECO:0000305} Precursor OS=Arabidopsis thaliana (Mouse-ear cress) ORFNames=F21M12.36 {ECO:0000312|EMBL:AAB60752.1} PE=1	Leucine rich repeat N-terminal domain	[T] LSE0002 A Receptor protein kinase containing LRR repeats	N/A	IPR013210; Leucine-rich repeat-containing N-terminal, plant-type
HLJ619_peak_339	339	tig00006975	25208	25572	365	*	Cor0042490.1	3.34622	Distal Intergenic	-1.81552	0.00309212	down	K09422//myb proto-oncogene protein, plant	N/A	PREDICTED: myb-related protein 308-like [Juglans regia]	Uncharacterized protein {ECO:0000313|EMBL:SPD07435.1} OS=Fagus sylvatica (Beechnut) ORFNames=FSB_LOCUS35317 {ECO:0000313|EMBL:SPD07435.1} PE=4	Transcription repressor MYB4 Myb-related protein 4 Short=AtMYB4 OS=Arabidopsis thaliana (Mouse-ear cress) Name=MYB4 OrderedLocusNames=At4g38620 ORFNames=F20M13.180 PE=1	Myb-like DNA-binding domain	[K] KOG0048 Transcription factor, Myb superfamily	http://plntfdb.bio.uni-potsdam.de/v3.0/fam_mem.php?family_id=MYB	IPR017930; Myb domain
HLJ619_peak_340	340	tig00006975	45770	46198	429	*	Cor0042500.1	4.18277	Distal Intergenic	-1.95847	9.14586e-07	down	K09422//myb proto-oncogene protein, plant	N/A	PREDICTED: transcription repressor MYB6-like [Juglans regia]	Uncharacterized protein {ECO:0000313|EMBL:SPD07433.1} OS=Fagus sylvatica (Beechnut) ORFNames=FSB_LOCUS35315 {ECO:0000313|EMBL:SPD07433.1} PE=4	Transcription repressor MYB4 Myb-related protein 4 Short=AtMYB4 OS=Arabidopsis thaliana (Mouse-ear cress) Name=MYB4 OrderedLocusNames=At4g38620 ORFNames=F20M13.180 PE=1	Myb-like DNA-binding domain	[K] KOG0048 Transcription factor, Myb superfamily	http://plntfdb.bio.uni-potsdam.de/v3.0/fam_mem.php?family_id=MYB-related	IPR017930; Myb domain
HLJ619_peak_344	344	tig00006975	1158876	1159216	341	*	Cor0042910.1	5.85588	Distal Intergenic	-1.77944	1.25935e-46	down	N/A	GO:0005515//molecular_function protein binding	PREDICTED: uncharacterized protein LOC108979138 [Juglans regia]	uncharacterized protein LOC108979138 {ECO:0000313|RefSeq:XP_018805281.1} OS=Juglans regia (English walnut) Name=LOC108979138 {ECO:0000313|RefSeq:XP_018805281.1} PE=4	N/A	PB1 domain	[R] LSE0156 A PB1 domain	N/A	IPR000270; PB1 domain
HLJ619_peak_345	345	tig00006975	1778485	1778947	463	*	Cor0043180.1	3.28253	Distal Intergenic	-2.62358	6.83046e-52	down	N/A	GO:0005516//molecular_function calmodulin binding;GO:0006950//biological_process response to stress	PREDICTED: protein SAR DEFICIENT 1-like [Juglans regia]	Uncharacterized protein {ECO:0000313|EMBL:SPD17489.1} OS=Fagus sylvatica (Beechnut) {ECO:0000313|EMBL:SPD17489.1} PE=4	Protein SAR DEFICIENT 1 {ECO:0000303|PubMed:20921422} OS=Arabidopsis thaliana (Mouse-ear cress) ORFNames=F25P22.22 {ECO:0000312|EMBL:AAG52065.1} PE=1	Calmodulin binding protein-like	[RT] LSE0433 A Predicted calmodulin-binding protein	N/A	IPR012416; CALMODULIN-BINDING PROTEIN60
HLJ619_peak_350	350	tig00006975	2558665	2559088	424	*	Cor0043530.1	3.98994	Promoter (1-2kb)	-3.78248	0.0331162	down	N/A	GO:0010112//biological_process regulation of systemic acquired resistance	N/A	N/A	N/A	N/A	N/A	N/A	IPR034577; Protein NIM1-INTERACTING 2
HLJ619_peak_353	353	tig00006975	3504284	3504623	340	*	Cor0043840.1	3.16005	Distal Intergenic	-2.64951	0.00815591	down	N/A	N/A	PREDICTED: transcription factor DICHOTOMA-like [Juglans regia]	transcription factor DICHOTOMA-like {ECO:0000313|RefSeq:XP_018825368.1} OS=Juglans regia (English walnut) Name=LOC108994571 {ECO:0000313|RefSeq:XP_018825368.1} PE=4	Transcription factor TCP18 Protein BRANCHED 1 Protein TEOSINTE BRANCHED 1-LIKE 1 OS=Arabidopsis thaliana (Mouse-ear cress) ORFNames=K24M9.4 PE=1	TCP family transcription factor	[K] LSE0380 A Predicted bHLH transcription factor	http://plntfdb.bio.uni-potsdam.de/v3.0/fam_mem.php?family_id=TCP	IPR017888; CYC/TB1, R domain
HLJ619_peak_369	369	tig00006985	1384083	1384643	561	*	Cor0022460.1	3.13162	Distal Intergenic	-2.25781	8.97287e-95	down	N/A	GO:0046983//molecular_function protein dimerization activity	PREDICTED: transcription factor bHLH106-like [Juglans regia]	transcription factor bHLH106-like {ECO:0000313|RefSeq:XP_018810563.1} OS=Juglans regia (English walnut) Name=LOC108983406 {ECO:0000313|RefSeq:XP_018810563.1} PE=4	Transcription factor bHLH106 Basic helix-loop-helix protein 106 Short=AtbHLH106 Short=bHLH 106 Transcription factor EN 56 bHLH transcription factor bHLH106 OS=Arabidopsis thaliana (Mouse-ear cress) ORFNames=T3K9.10 PE=2	Helix-loop-helix DNA-binding domain	[K] KOG3561 Aryl-hydrocarbon receptor nuclear translocator	http://plntfdb.bio.uni-potsdam.de/v3.0/fam_mem.php?family_id=bHLH	IPR011598; Myc-type, basic helix-loop-helix (bHLH) domain
HLJ619_peak_372	372	tig00006985	2374547	2375107	561	*	Cor0022880.1	5.01933	Distal Intergenic	-2.13935	1.12385e-12	down	K07195//exocyst complex component 7	GO:0000145//cellular_component exocyst;GO:0006887//biological_process exocytosis	exocyst complex component EXO70A1 [Hevea brasiliensis]	Exocyst subunit Exo70 family protein {ECO:0000256|RuleBase:RU365026} OS=Theobroma cacao (Cacao) (Cocoa) ORFNames=TCM_022918 {ECO:0000313|EMBL:EOY08456.1} PE=3	Exocyst complex component EXO70A1 Short=AtExo70a1 Exocyst subunit Exo70 family protein A1 OS=Arabidopsis thaliana (Mouse-ear cress) Name=EXO70A1 OrderedLocusNames=At5g03540 ORFNames=F12E4.320 PE=1	Exo70 exocyst complex subunit	[U] KOG2344 Exocyst component protein and related proteins	N/A	IPR004140; Exocyst complex component Exo70
HLJ619_peak_374	374	tig00006985	2674151	2674524	374	*	Cor0023030.1	4.55609	Promoter (<=1kb)	-2.72417	1.17581e-30	down	N/A	GO:0004842//molecular_function ubiquitin-protein transferase activity;GO:0016567//biological_process protein ubiquitination	PREDICTED: E3 ubiquitin-protein ligase PUB24-like [Juglans regia]	RING-type E3 ubiquitin transferase {ECO:0000256|SAAS:SAAS00702733} EC=2.3.2.27 {ECO:0000256|SAAS:SAAS00702733} OS=Fagus sylvatica (Beechnut) ORFNames=FSB_LOCUS42426 {ECO:0000313|EMBL:SPD14544.1} PE=4	E3 ubiquitin-protein ligase PUB24 EC=2.3.2.27 Plant U-box protein 24 RING-type E3 ubiquitin transferase PUB24 {ECO:0000305} U-box domain-containing protein 24 OS=Arabidopsis thaliana (Mouse-ear cress) Name=PUB24 OrderedLocusNames=At3g11840 ORFNames=F26K24.13 PE=1	U-box domain	[R] LSE0497 A U-box protein	N/A	IPR003613; U box domain
HLJ619_peak_380	380	tig00006985	3938344	3938685	342	*	Cor0023860.1	3.31268	Distal Intergenic	-3.99017	7.79662e-07	down	K01723//hydroperoxide dehydratase [EC:4.2.1.92]	GO:0005506//molecular_function iron ion binding;GO:0016705//molecular_function oxidoreductase activity, acting on paired donors, with incorporation or reduction of molecular oxygen;GO:0020037//molecular_function heme binding;GO:0055114//biological_process oxidation-reduction process;GO:0004497//molecular_function monooxygenase activity	PREDICTED: allene oxide synthase 3-like [Juglans regia]	Uncharacterized protein {ECO:0000313|EMBL:SPD15234.1} OS=Fagus sylvatica (Beechnut) {ECO:0000313|EMBL:SPD15234.1} PE=3	Allene oxide synthase 1, chloroplastic {ECO:0000303|PubMed:12351632} Short=LeAOS1 {ECO:0000303|PubMed:12351632} EC=4.2.1.92 {ECO:0000305} Cytochrome P450 74A {ECO:0000305} Precursor OS=Solanum lycopersicum (Tomato) (Lycopersicon esculentum) OrderedLocusNames=Solyc04g079730 PE=2	Cytochrome P450	[I] LSE0481 A Hydroperoxide lyase	N/A	IPR002403; Cytochrome P450, E-class, group IV
HLJ619_peak_381	381	tig00006985	4061234	4061721	488	*	Cor0023960.1	4.16448	Distal Intergenic	-2.5576	5.86535e-29	down	N/A	N/A	PREDICTED: dirigent protein 22-like [Juglans regia]	Dirigent protein {ECO:0000256|RuleBase:RU363099} OS=Fagus sylvatica (Beechnut) ORFNames=FSB_LOCUS20396 {ECO:0000313|EMBL:SPC92514.1} PE=3	Dirigent protein 21 Short=AtDIR21 Precursor OS=Arabidopsis thaliana (Mouse-ear cress) Name=DIR21 OrderedLocusNames=At1g65870 ORFNames=F12P19.3 PE=3	Dirigent-like protein	protein	N/A	IPR004265; Dirigent protein
HLJ619_peak_383	383	tig00006985	4387266	4387766	501	*	Cor0024170.1	3.34622	Distal Intergenic	-6.40574	5.0866e-56	down	K00430//peroxidase [EC:1.11.1.7]	GO:0004601//molecular_function peroxidase activity;GO:0006979//biological_process response to oxidative stress;GO:0020037//molecular_function heme binding;GO:0055114//biological_process oxidation-reduction process	peroxidase precursor [Corylus avellana]	Peroxidase {ECO:0000256|RuleBase:RU362060, ECO:0000256|SAAS:SAAS00709852} EC=1.11.1.7 {ECO:0000256|RuleBase:RU362060, ECO:0000256|SAAS:SAAS00709852} OS=Corylus avellana (European hazel) (Corylus maxima) PE=2	Peroxidase 53 Short=Atperox P53 EC=1.11.1.7 ATPA2 Precursor OS=Arabidopsis thaliana (Mouse-ear cress) ORFNames=MPH15.8 PE=1	Peroxidase	[R] TWOG0189 Peroxidase	N/A	IPR002016; Haem peroxidase, plant/fungal/bacterial
HLJ619_peak_387	387	tig00006985	4960119	4960861	743	*	Cor0024610.1	5.01933	Promoter (2-3kb)	-1.83301	0.00967879	down	N/A	N/A	hypothetical protein PHAVU_011G214100g [Phaseolus vulgaris] >ESW05842.1 hypothetical protein PHAVU_011G214100g [Phaseolus vulgaris]	Uncharacterized protein {ECO:0000313|EMBL:SPC92418.1} OS=Fagus sylvatica (Beechnut) ORFNames=FSB_LOCUS20300 {ECO:0000313|EMBL:SPC92418.1} PE=4	FT-interacting protein 7 {ECO:0000303|PubMed:29915329} Short=OsFTIP7 {ECO:0000303|PubMed:29915329} OS=Oryza sativa subsp. japonica (Rice) OsJ_18293 {ECO:0000312|EMBL:EEE63479.1} PE=1	Plant phosphoribosyltransferase C-terminal	[E] LSE0030 A Anthranilate phosphoribosyltransferase and related proteins	N/A	IPR013583; Phosphoribosyltransferase C-terminal
HLJ619_peak_394	394	tig00006990	744625	745070	446	*	Cor0115430.1	3.34622	Distal Intergenic	-1.55629	6.55775e-143	down	N/A	GO:0004672//molecular_function protein kinase activity;GO:0005524//molecular_function ATP binding;GO:0006468//biological_process protein phosphorylation	PREDICTED: probable receptor-like protein kinase At5g47070 [Juglans regia]	probable receptor-like protein kinase At5g47070 {ECO:0000313|RefSeq:XP_018854898.1} OS=Juglans regia (English walnut) Name=LOC109017020 {ECO:0000313|RefSeq:XP_018854898.1} PE=4	Probable serine/threonine-protein kinase PBL19 {ECO:0000305} EC=2.7.11.1 {ECO:0000305} PBS1-like protein 19 {ECO:0000303|PubMed:20413097} OS=Arabidopsis thaliana (Mouse-ear cress) Name=PBL19 OrderedLocusNames=At5g47070 ORFNames=K14A3.2 PE=1	Protein tyrosine kinase	[T] KOG1187 Serine/threonine protein kinase	N/A	IPR001245; Serine-threonine/tyrosine-protein kinase, catalytic domain
HLJ619_peak_424	424	tig00006994	741461	742108	648	*	Cor0155220.1	4.03829	Distal Intergenic	-2.23247	0	down	K08241//jasmonate O-methyltransferase [EC:2.1.1.141]	GO:0008168//molecular_function methyltransferase activity	PREDICTED: 7-methylxanthosine synthase 1-like [Juglans regia]	7-methylxanthosine synthase 1-like {ECO:0000313|RefSeq:XP_018807700.1} OS=Juglans regia (English walnut) Name=LOC108981082 {ECO:0000313|RefSeq:XP_018807700.1} PE=4	7-methylxanthosine synthase 1 Short=CmXRS1 EC=2.1.1.158 Methyltransferase-like 3 Short=CaMTL3 Xanthosine methyltransferase Short=CaXMT1 OS=Coffea arabica (Arabian coffee) Name=XMT1 Synonyms=CS1, MTL3, XRS1 PE=1	SAM dependent carboxyl methyltransferase	[QV] LSE0351 A S-adenosyl-L-methionine:carboxyl methyltransferase	N/A	IPR005299; SAM dependent carboxyl methyltransferase
HLJ619_peak_426	426	tig00006994	769714	770073	360	*	Cor0155230.1	3.23064	Intron (Cor0155220.1/Cor0155220, intron 4 of 4)	-2.23247	0	down	K08900//mitochondrial chaperone BCS1	GO:0005524//molecular_function ATP binding	PREDICTED: AAA-ATPase At3g50940-like [Juglans regia]	AAA-ATPase At3g50940-like {ECO:0000313|RefSeq:XP_018815368.1} OS=Juglans regia (English walnut) Name=LOC108986998 {ECO:0000313|RefSeq:XP_018815368.1} PE=3	Protein HYPER-SENSITIVITY-RELATED 4 {ECO:0000303|PubMed:15181213} Short=AtHSR4 {ECO:0000303|PubMed:15181213} EC=3.6.1.3 {ECO:0000250|UniProtKB:Q9FLD5} BCS1-like protein OS=Arabidopsis thaliana (Mouse-ear cress) ORFNames=F18B3.210 {ECO:0000312|EMBL:CAB42922.1} PE=2	ATPase family associated with various cellular activities (AAA)	[O] KOG0743 AAA+-type ATPase	N/A	IPR025753; AAA-type ATPase, N-terminal domain
HLJ619_peak_430	430	tig00006996	1295257	1295885	629	*	Cor0100050.1	3.34622	Distal Intergenic	-1.764	3.62601e-187	down	K01426//amidase [EC:3.5.1.4]	N/A	PREDICTED: putative amidase C869.01 [Juglans regia]	Uncharacterized protein {ECO:0000313|EMBL:SPC88132.1} OS=Fagus sylvatica (Beechnut) ORFNames=FSB_LOCUS16014 {ECO:0000313|EMBL:SPC88132.1} PE=4	Probable amidase At4g34880 {ECO:0000305} EC=3.5.1.4 {ECO:0000250|UniProtKB:Q9FR37} OS=Arabidopsis thaliana (Mouse-ear cress) T11I11.120 {ECO:0000312|EMBL:CAB45449.1} PE=2	Amidase	[J] KOG1211 Amidases	N/A	IPR023631; Amidase signature domain
HLJ619_peak_441	441	tig00007002	778370	778919	550	*	Cor0004970.1	4.25856	Downstream (1-2kb)	-6.69897	1.61199e-12	down	N/A	GO:0030145//molecular_function manganese ion binding;GO:0045735//molecular_function nutrient reservoir activity	germin-like protein subfamily 1 member 20 [Durio zibethinus]	Uncharacterized protein {ECO:0000313|EMBL:SPD33599.1} OS=Fagus sylvatica (Beechnut) ORFNames=FSB_LOCUS61481 {ECO:0000313|EMBL:SPD33599.1} PE=3	Germin-like protein subfamily 1 member 7 Precursor OS=Arabidopsis thaliana (Mouse-ear cress) OrderedLocusNames=At3g05950 ORFNames=F10A16.25, F2O10.9 PE=2	Cupin	[V] LSE0346 A Germin/oxalate oxidase	N/A	IPR006045; Cupin 1
HLJ619_peak_446	446	tig00007002	2899027	2899695	669	*	Cor0005940.1	3.34622	Distal Intergenic	-1.11159	2.1301e-30	down	K20547//basic endochitinase B [EC:3.2.1.14]	GO:0004568//molecular_function chitinase activity;GO:0006032//biological_process chitin catabolic process;GO:0016998//biological_process cell wall macromolecule catabolic process	PREDICTED: endochitinase-like [Juglans regia]	endochitinase-like {ECO:0000313|RefSeq:XP_018842015.1} OS=Juglans regia (English walnut) Name=LOC109007006 {ECO:0000313|RefSeq:XP_018842015.1} PE=4	Basic endochitinase C EC=3.2.1.14 Rye seed chitinase-c Short=RSC-c Precursor OS=Secale cereale (Rye) Name=rscc {ECO:0000312|EMBL:BAB18520.1} PE=1	Chitinase class I	[R] KOG4742 Predicted chitinase	N/A	IPR000726; Glycoside hydrolase, family 19, catalytic
HLJ619_peak_448	448	tig00007002	3063592	3064225	634	*	Cor0005970.1	4.87162	Distal Intergenic	-1.11159	2.1301e-30	down	K20547//basic endochitinase B [EC:3.2.1.14]	GO:0004568//molecular_function chitinase activity;GO:0006032//biological_process chitin catabolic process;GO:0016998//biological_process cell wall macromolecule catabolic process	PREDICTED: endochitinase-like [Juglans regia]	endochitinase-like {ECO:0000313|RefSeq:XP_018842015.1} OS=Juglans regia (English walnut) Name=LOC109007006 {ECO:0000313|RefSeq:XP_018842015.1} PE=4	Chitinase 3 EC=3.2.1.14 Basic endochitinase 1 Class I chitinase c Short=OsChia1c Pathogenesis related (PR)-3 chitinase 3 Precursor OS=Oryza sativa subsp. japonica (Rice) ORFNames=P0017G10.2, P0548E04.22 PE=2	Chitinase class I	[R] KOG4742 Predicted chitinase	N/A	IPR000726; Glycoside hydrolase, family 19, catalytic
HLJ619_peak_449	449	tig00007002	3164801	3165803	1003	*	Cor0005980.1	3.34622	Distal Intergenic	-1.4007	7.95546e-31	down	K20547//basic endochitinase B [EC:3.2.1.14]	GO:0005737//cellular_component cytoplasm;GO:0006887//biological_process exocytosis;GO:0048278//biological_process vesicle docking;GO:0004568//molecular_function chitinase activity;GO:0006032//biological_process chitin catabolic process;GO:0016998//biological_process cell wall macromolecule catabolic process	endochitinase A-like [Momordica charantia]	Glycoside hydrolase, family 19, catalytic {ECO:0000313|EMBL:OMO55842.1} OS=Corchorus capsularis (Jute) ORFNames=CCACVL1_26958 {ECO:0000313|EMBL:OMO55842.1} PE=4	Chitinase 2 EC=3.2.1.14 Class I chitinase b Short=OsChia1b Pathogenesis related (PR)-3 chitinase 2 Precursor OS=Oryza sativa subsp. japonica (Rice) OrderedLocusNames=Os05g0399300, LOC_Os05g33130 ORFNames=OsJ_18467 PE=1	Chitinase class I	[R] KOG4742 Predicted chitinase	N/A	IPR009976; Exocyst complex component Sec10-like
HLJ619_peak_470	470	tig00007002	6941749	6942138	390	*	Cor0007180.1	3.23234	Distal Intergenic	-2.33835	1.40353e-11	down	N/A	GO:0046983//molecular_function protein dimerization activity	PREDICTED: transcription factor bHLH111 [Vitis vinifera] >CBI27511.3 unnamed protein product, partial [Vitis vinifera]	Uncharacterized protein {ECO:0000313|EMBL:SPC86697.1} OS=Fagus sylvatica (Beechnut) ORFNames=FSB_LOCUS14579 {ECO:0000313|EMBL:SPC86697.1} PE=4	Transcription factor bHLH111 Basic helix-loop-helix protein 111 Short=AtbHLH111 Short=bHLH 111 Transcription factor EN 66 bHLH transcription factor bHLH111 OS=Arabidopsis thaliana (Mouse-ear cress) ORFNames=F17F8.3 PE=2	N/A	[KT] LSE0107 A bHLH transcription factor	N/A	IPR011598; Myc-type, basic helix-loop-helix (bHLH) domain
HLJ619_peak_472	472	tig00007008	107698	108116	419	*	Cor0000050.1	3.34622	Promoter (<=1kb)	-2.8615	3.39903e-75	down	N/A	N/A	PREDICTED: protein NUCLEAR FUSION DEFECTIVE 4-like [Juglans regia] >XP_018857776.1 PREDICTED: protein NUCLEAR FUSION DEFECTIVE 4-like [Juglans regia]	protein NUCLEAR FUSION DEFECTIVE 4-like {ECO:0000313|RefSeq:XP_018857775.1, ECO:0000313|RefSeq:XP_018857776.1} OS=Juglans regia (English walnut) ECO:0000313|RefSeq:XP_018857776.1} PE=4	N/A	Nodulin-like	[GR] TWOG0181 Predicted monocarboxylate transporter/nodulin related protein	N/A	IPR010658; Nodulin-like
HLJ619_peak_473	473	tig00007008	173646	174011	366	*	Cor0000100.1	3.32098	Distal Intergenic	-1.33406	2.35547e-77	down	K00799//glutathione S-transferase [EC:2.5.1.18]	GO:0005515//molecular_function protein binding	PREDICTED: glutathione S-transferase U8-like [Juglans regia]	Uncharacterized protein {ECO:0000313|EMBL:SPD13974.1} OS=Fagus sylvatica (Beechnut) ORFNames=FSB_LOCUS41856 {ECO:0000313|EMBL:SPD13974.1} PE=3	Glutathione S-transferase U8 Short=AtGSTU8 EC=2.5.1.18 GST class-tau member 8 OS=Arabidopsis thaliana (Mouse-ear cress) Name=GSTU8 OrderedLocusNames=At3g09270 ORFNames=F3L24.14 PE=2	Glutathione S-transferase, C-terminal domain	[O] KOG0406 Glutathione S-transferase	N/A	IPR010987; Glutathione S-transferase, C-terminal-like
HLJ619_peak_478	478	tig00007008	2141414	2141752	339	*	Cor0001590.1	3.16803	Downstream (<1kb)	-1.12275	3.83962e-136	down	K08678//UDP-glucuronate decarboxylase [EC:4.1.1.35]	N/A	PREDICTED: UDP-glucuronic acid decarboxylase 1 [Juglans regia]	UDP-glucuronic acid decarboxylase 1 {ECO:0000313|RefSeq:XP_018841198.1} OS=Juglans regia (English walnut) Name=LOC109006382 {ECO:0000313|RefSeq:XP_018841198.1} PE=4	UDP-glucuronic acid decarboxylase 1 EC=4.1.1.35 UDP-XYL synthase 1 UDP-glucuronate decarboxylase 1 Short=UGD Short=UXS-1 OS=Arabidopsis thaliana (Mouse-ear cress) Name=UXS1 OrderedLocusNames=At3g53520 ORFNames=F4P12.220 PE=1	GDP-mannose 4,6 dehydratase	[GM] KOG1429 dTDP-glucose 4-6-dehydratase/UDP-glucuronic acid decarboxylase	N/A	IPR016040; NAD(P)-binding domain
HLJ619_peak_484	484	tig00007008	3451894	3452279	386	*	Cor0002620.1	3.34622	Distal Intergenic	-1.8243	4.66438e-150	down	N/A	N/A	PREDICTED: uncharacterized protein LOC109016720 [Juglans regia]	Uncharacterized protein {ECO:0000313|EMBL:SPD32272.1} OS=Fagus sylvatica (Beechnut) ORFNames=FSB_LOCUS60154 {ECO:0000313|EMBL:SPD32272.1} PE=4	N/A	Senescence regulator	[X] LSE1217 A Unnamed protein	N/A	IPR007608; Senescence regulator S40
HLJ619_peak_500	500	tig00007009	253837	254401	565	*	Cor0207310.1	3.62777	Promoter (<=1kb)	-1.17687	1.01069e-121	down	N/A	N/A	PREDICTED: uncharacterized protein LOC108982675 isoform X1 [Juglans regia]	Uncharacterized protein {ECO:0000313|EMBL:SPD31556.1} OS=Fagus sylvatica (Beechnut) ORFNames=FSB_LOCUS59438 {ECO:0000313|EMBL:SPD31556.1} PE=4	Uncharacterized protein At1g76660 OS=Arabidopsis thaliana (Mouse-ear cress) OrderedLocusNames=At1g76660 ORFNames=F28O16.3 PE=2	N/A	[X] LSE1440 A Unnamed protein	N/A	N/A
HLJ619_peak_513	513	tig00007011	2504026	2504369	344	*	Cor0036810.1	3.13474	Promoter (2-3kb)	-2.15002	1.38239e-45	down	K14488//SAUR family protein	GO:0009733//biological_process response to auxin	PREDICTED: auxin-responsive protein SAUR32-like [Juglans regia]	auxin-responsive protein SAUR32-like {ECO:0000313|RefSeq:XP_018822321.1} OS=Juglans regia (English walnut) Name=LOC108992269 {ECO:0000313|RefSeq:XP_018822321.1} PE=4	Auxin-responsive protein SAUR32 {ECO:0000305} Protein ABOLISHED APICAL HOOK MAINTENANCE 1 {ECO:0000303|Ref.6} Protein SMALL AUXIN UP RNA 32 {ECO:0000303|PubMed:12036261} OS=Arabidopsis thaliana (Mouse-ear cress) OrderedLocusNames=At2g46690 {ECO:0000312|Araport:AT2G46690} PE=2	Auxin responsive protein	[RT] LSE0432 A Auxin responsive protein	N/A	IPR003676; Small auxin-up RNA
HLJ619_peak_515	515	tig00007011	3036575	3036951	377	*	Cor0037450.1	4.59174	Distal Intergenic	-2.71633	1.74236e-08	down	K19861//benzyl alcohol O-benzoyltransferase [EC:2.3.1.196 2.3.1.232]	GO:0016747//molecular_function transferase activity, transferring acyl groups other than amino-acyl groups	PREDICTED: benzyl alcohol O-benzoyltransferase-like [Juglans regia]	Uncharacterized protein {ECO:0000313|EMBL:SPC93475.1} OS=Fagus sylvatica (Beechnut) ORFNames=FSB_LOCUS21357 {ECO:0000313|EMBL:SPC93475.1} PE=4	Benzyl alcohol O-benzoyltransferase EC=2.3.1.196 Benzoyl coenzyme A:benzyl alcohol benzoyl transferase OS=Nicotiana tabacum (Common tobacco) Name=HSR201 PE=1	Transferase family	[RQ] LSE0273 A Predicted N-hydroxycinnamoyl/benzoyltransferase	N/A	IPR003480; Transferase
HLJ619_peak_516	516	tig00007011	3049929	3050337	409	*	Cor0037460.1	3.95007	Promoter (<=1kb)	-1.54386	9.11032e-31	down	K19861//benzyl alcohol O-benzoyltransferase [EC:2.3.1.196 2.3.1.232]	GO:0016747//molecular_function transferase activity, transferring acyl groups other than amino-acyl groups	PREDICTED: benzyl alcohol O-benzoyltransferase-like [Juglans regia]	benzyl alcohol O-benzoyltransferase-like {ECO:0000313|RefSeq:XP_018828167.1} OS=Juglans regia (English walnut) Name=LOC108996627 {ECO:0000313|RefSeq:XP_018828167.1} PE=4	Benzyl alcohol O-benzoyltransferase EC=2.3.1.196 Benzoyl coenzyme A:benzyl alcohol benzoyl transferase OS=Nicotiana tabacum (Common tobacco) Name=HSR201 PE=1	Transferase family	[RQ] LSE0273 A Predicted N-hydroxycinnamoyl/benzoyltransferase	N/A	IPR003480; Transferase
HLJ619_peak_527	527	tig00007013	899554	900008	455	*	Cor0130270.1	3.25724	Intron (Cor0130270.1/Cor0130270, intron 2 of 3)	-3.07681	4.30681e-22	down	K13508//glycerol-3-phosphate acyltransferase [EC:2.3.1.15 2.3.1.198]	GO:0008152//biological_process metabolic process;GO:0016746//molecular_function transferase activity, transferring acyl groups	PREDICTED: probable glycerol-3-phosphate acyltransferase 2 [Juglans regia]	Uncharacterized protein {ECO:0000313|EMBL:SPC95332.1} OS=Fagus sylvatica (Beechnut) ORFNames=FSB_LOCUS23214 {ECO:0000313|EMBL:SPC95332.1} PE=4	Probable glycerol-3-phosphate acyltransferase 2 Short=AtGPAT2 EC=2.3.1.15 OS=Arabidopsis thaliana (Mouse-ear cress) Name=GPAT2 OrderedLocusNames=At1g02390 ORFNames=T6A9.17, T6A9.8 PE=2	Acyltransferase	[X] LSE1225 A Unnamed protein	N/A	IPR002123; Phospholipid/glycerol acyltransferase
HLJ619_peak_530	530	tig00007014	222664	223029	366	*	Cor0204930.1	3.22299	Promoter (<=1kb)	-1.45119	2.48451e-07	down	N/A	N/A	PREDICTED: uncharacterized protein LOC109018430 [Juglans regia]	Uncharacterized protein {ECO:0000313|EMBL:SPC88994.1} OS=Fagus sylvatica (Beechnut) ORFNames=FSB_LOCUS16876 {ECO:0000313|EMBL:SPC88994.1} PE=4	N/A	Cotton fibre expressed protein	[X] LSE1235 A Unnamed protein	N/A	IPR008480; Protein of unknown function DUF761, plant
HLJ619_peak_541	541	tig00007025	516010	516372	363	*	Cor0128650.1	3.98223	Distal Intergenic	-1.43529	0.0371235	down	#N/A	#N/A	#N/A	#N/A	#N/A	#N/A	#N/A	#N/A	#N/A
HLJ619_peak_576	576	tig00007033	2920598	2920916	319	*	Cor0057210.1	3.82645	Distal Intergenic	-1.66585	4.34774e-65	down	N/A	N/A	PREDICTED: pentatricopeptide repeat-containing protein At5g13770, chloroplastic [Juglans regia]	Pentatricopeptide repeat-containing protein, chloroplastic {ECO:0000313|EMBL:RDY08282.1} Fragment OS=Mucuna pruriens (Velvet bean) (Dolichos pruriens) ORFNames=CR513_07500 {ECO:0000313|EMBL:RDY08282.1} PE=4	Pentatricopeptide repeat-containing protein At5g13770, chloroplastic Precursor OS=Arabidopsis thaliana (Mouse-ear cress) OrderedLocusNames=At5g13770 ORFNames=MXE10.6 PE=2	PPR repeat	[R] KOG4197 FOG: PPR repeat	N/A	IPR002885; Pentatricopeptide repeat
HLJ619_peak_580	580	tig00007035	914590	914956	367	*	Cor0131140.1	3.22215	Distal Intergenic	-1.4788	7.18135e-15	down	N/A	N/A	PREDICTED: glucan endo-1,3-beta-glucosidase 12-like isoform X1 [Juglans regia]	glucan endo-1,3-beta-glucosidase 12-like isoform X1 {ECO:0000313|RefSeq:XP_018860018.1} OS=Juglans regia (English walnut) Name=LOC109021761 {ECO:0000313|RefSeq:XP_018860018.1} PE=4	Glucan endo-1,3-beta-glucosidase 3 EC=3.2.1.39 (1->3)-beta-glucan endohydrolase 3 Short=(1->3)-beta-glucanase 3 Beta-1,3-endoglucanase 3 Short=Beta-1,3-glucanase 3 Precursor OS=Arabidopsis thaliana (Mouse-ear cress) OrderedLocusNames=At2g01630 ORFNames=T8O11.20 PE=2	X8 domain	[G] LSE0495 A 1, 3-beta-glucanase	N/A	IPR012946; X8 domain
HLJ619_peak_586	586	tig00007039	761687	762061	375	*	Cor0105520.1	5.00464	Distal Intergenic	-1.40891	0.000847169	down	N/A	N/A	PREDICTED: UDP-glycosyltransferase 82A1 isoform X1 [Juglans regia]	Glycosyltransferase {ECO:0000256|RuleBase:RU362057} EC=2.4.1.- {ECO:0000256|RuleBase:RU362057} OS=Juglans regia (English walnut) Name=LOC108996088 {ECO:0000313|RefSeq:XP_018827398.1} PE=3	UDP-glycosyltransferase 82A1 EC=2.4.1.- OS=Arabidopsis thaliana (Mouse-ear cress) Name=UGT82A1 OrderedLocusNames=At3g22250 ORFNames=MMP21.3 PE=2	N/A	[GC] KOG1192 UDP-glucuronosyl and UDP-glucosyl transferase	N/A	N/A
HLJ619_peak_594	594	tig00007041	204160	204647	488	*	Cor0195730.1	4.18277	Promoter (1-2kb)	-2.58215	0.0369775	down	N/A	N/A	Bifunctional inhibitor/lipid-transfer protein/seed storage 2S albumin superfamily protein isoform 1 [Theobroma cacao]	Bifunctional inhibitor/lipid-transfer protein/seed storage 2S albumin superfamily protein isoform 2 {ECO:0000313|EMBL:EOX93224.1} Fragment OS=Theobroma cacao (Cacao) (Cocoa) ORFNames=TCM_002067 {ECO:0000313|EMBL:EOX93224.1} PE=4	36.4 kDa proline-rich protein OS=Solanum lycopersicum (Tomato) (Lycopersicon esculentum) Name=TPRP-F1 PE=2	Hydrophobic seed protein	[R] LSE0121 A AAI domain	N/A	IPR027923; Hydrophobic seed protein
HLJ619_peak_601	601	tig00007043	797159	797550	392	*	Cor0118740.1	3.2053	Promoter (<=1kb)	-1.4982	7.62502e-33	down	N/A	N/A	remorin-like isoform X1 [Sesamum indicum]	Uncharacterized protein {ECO:0000313|EMBL:SPD02592.1} OS=Fagus sylvatica (Beechnut) ORFNames=FSB_LOCUS30474 {ECO:0000313|EMBL:SPD02592.1} PE=4	Remorin pp34 OS=Solanum tuberosum (Potato) PE=1	Remorin, N-terminal region	[X] LSE1214 A Unnamed protein	N/A	IPR005518; Remorin, N-terminal
HLJ619_peak_606	606	tig00007043	1604893	1605380	488	*	Cor0119310.1	4.04815	Distal Intergenic	-2.0768	2.18577e-171	down	N/A	N/A	PREDICTED: molybdenum cofactor sulfurase [Juglans regia]	molybdenum cofactor sulfurase {ECO:0000313|RefSeq:XP_018830839.1} OS=Juglans regia (English walnut) Name=LOC108998656 {ECO:0000313|RefSeq:XP_018830839.1} PE=4	Molybdenum cofactor sulfurase {ECO:0000255|HAMAP-Rule:MF_03050} Short=MCS {ECO:0000255|HAMAP-Rule:MF_03050} Short=MOS {ECO:0000255|HAMAP-Rule:MF_03050} Short=MoCo sulfurase {ECO:0000255|HAMAP-Rule:MF_03050} EC=2.8.1.9 {ECO:0000255|HAMAP-Rule:MF_03050} Molybdenum cofactor sulfurtransferase {ECO:0000255|HAMAP-Rule:MF_03050} OS=Solanum lycopersicum (Tomato) (Lycopersicon esculentum) Name=FLACCA PE=2	Aminotransferase class-V	[H] KOG2142 Molybdenum cofactor sulfurase	N/A	IPR000192; Aminotransferase class V domain
HLJ619_peak_610	610	tig00007049	369060	369571	512	*	Cor0188960.1	3.32706	Promoter (<=1kb)	-2.13375	0	down	K09264//MADS-box transcription factor, plant	GO:0003677//molecular_function DNA binding;GO:0046983//molecular_function protein dimerization activity;GO:0003700//molecular_function DNA-binding transcription factor activity;GO:0005634//cellular_component nucleus;GO:0006355//biological_process regulation of transcription, DNA-templated	agamous-like MADS-box protein AGL11 homologue, partial [Betula pendula]	Agamous-like MADS-box protein AGL11 homologue {ECO:0000313|EMBL:CAK55150.1} Fragment OS=Betula pendula (European white birch) (Betula verrucosa) Name=mads7 {ECO:0000313|EMBL:CAK55150.1} PE=2	Agamous-like MADS-box protein AGL11 Protein SEEDSTICK OS=Arabidopsis thaliana (Mouse-ear cress) ORFNames=T5L19.90 PE=1	K-box region	[K] KOG0014 MADS box transcription factor	http://plntfdb.bio.uni-potsdam.de/v3.0/fam_mem.php?family_id=MADS	IPR002487; Transcription factor, K-box
HLJ619_peak_612	612	tig00007051	548949	549286	338	*	Cor0146940.1	3.1615	Distal Intergenic	-1.78437	0.0340849	down	K01179//endoglucanase [EC:3.2.1.4]	GO:0004553//molecular_function hydrolase activity, hydrolyzing O-glycosyl compounds;GO:0005975//biological_process carbohydrate metabolic process	PREDICTED: endoglucanase 9-like [Juglans regia]	Endoglucanase {ECO:0000256|RuleBase:RU361166} EC=3.2.1.4 {ECO:0000256|RuleBase:RU361166} OS=Juglans regia (English walnut) Name=LOC109001399 {ECO:0000313|RefSeq:XP_018834199.1} PE=3	Endoglucanase 3 EC=3.2.1.4 Cellulase 5 Short=AtCEL5 Endo-1,4-beta glucanase 3 Precursor OS=Arabidopsis thaliana (Mouse-ear cress) Name=CEL5 OrderedLocusNames=At1g22880 ORFNames=F19G10.16 PE=2	Glycosyl hydrolase family 9	[G] LSE0350 A Glycosyl hydrolase (endo-1, 4-beta-glucanase)	N/A	IPR001701; Glycoside hydrolase family 9
HLJ619_peak_615	615	tig00007053	34541	34962	422	*	Cor0192010.1	4.48644	Promoter (1-2kb)	-1.8746	3.56442e-242	down	N/A	GO:0003677//molecular_function DNA binding;GO:0005634//cellular_component nucleus;GO:0006355//biological_process regulation of transcription, DNA-templated;GO:0009725//biological_process response to hormone;GO:0005515//molecular_function protein binding	PREDICTED: LOW QUALITY PROTEIN: auxin response factor 8-like [Juglans regia]	Auxin response factor {ECO:0000256|RuleBase:RU004561} OS=Juglans regia (English walnut) Name=LOC109001351 {ECO:0000313|RefSeq:XP_018834144.1} PE=3	Auxin response factor 8 Protein FRUIT WITHOUT FERTILIZATION OS=Arabidopsis thaliana (Mouse-ear cress) ORFNames=K15O15.5 PE=1	B3 DNA binding domain	[TK] LSE0284 A Auxin response transcription factor	http://plntfdb.bio.uni-potsdam.de/v3.0/fam_mem.php?family_id=ARF	IPR033389; AUX/IAA domain
HLJ619_peak_618	618	tig00007057	65730	66123	394	*	Cor0052490.1	4.18277	Promoter (2-3kb)	-4.34455	5.30733e-81	down	N/A	GO:0004672//molecular_function protein kinase activity;GO:0005524//molecular_function ATP binding;GO:0006468//biological_process protein phosphorylation	PREDICTED: rust resistance kinase Lr10-like [Juglans regia] >XP_018856149.1 PREDICTED: rust resistance kinase Lr10-like [Juglans regia]	rust resistance kinase Lr10-like {ECO:0000313|RefSeq:XP_018854680.1, ECO:0000313|RefSeq:XP_018856149.1} OS=Juglans regia (English walnut) Synonyms=LOC109016762 {ECO:0000313|RefSeq:XP_018854680.1} PE=3	PR5-like receptor kinase {ECO:0000303|PubMed:8637920} EC=2.7.11.1 {ECO:0000269|PubMed:8637920} Precursor OS=Arabidopsis thaliana (Mouse-ear cress) ORFNames=MXA21.170 {ECO:0000312|EMBL:BAB11294.1} PE=1	Protein kinase domain	[T] LSE0056 A Protein kinase, contains thaumatin domains	N/A	IPR000719; Protein kinase domain
HLJ619_peak_620	620	tig00007057	147792	148160	369	*	Cor0052530.1	4.18277	Distal Intergenic	-1.95892	5.95235e-62	down	N/A	GO:0004672//molecular_function protein kinase activity;GO:0006468//biological_process protein phosphorylation;GO:0005524//molecular_function ATP binding	PREDICTED: LEAF RUST 10 DISEASE-RESISTANCE LOCUS RECEPTOR-LIKE PROTEIN KINASE-like 1.3 isoform X3 [Juglans regia]	LEAF RUST 10 DISEASE-RESISTANCE LOCUS RECEPTOR-LIKE PROTEIN KINASE-like 1.3 isoform X3 {ECO:0000313|RefSeq:XP_018816647.1} OS=Juglans regia (English walnut) Name=LOC108988017 {ECO:0000313|RefSeq:XP_018816647.1} PE=4	LEAF RUST 10 DISEASE-RESISTANCE LOCUS RECEPTOR-LIKE PROTEIN KINASE-like 1.3 {ECO:0000303|PubMed:12805585} EC=2.7.11.1 Probable receptor-like serine/threonine-protein kinase LRK10L-1.3 {ECO:0000305} Precursor OS=Arabidopsis thaliana (Mouse-ear cress) ORFNames=MXA21.10 {ECO:0000312|EMBL:BAB11288.1} PE=2	Wall-associated receptor kinase C-terminal	[T] KOG1187 Serine/threonine protein kinase	N/A	IPR032872; Wall-associated receptor kinase, C-terminal
HLJ619_peak_625	625	tig00007057	1995398	1995925	528	*	Cor0054510.1	4.02493	Promoter (<=1kb)	-2.22987	4.7004e-145	down	N/A	N/A	PREDICTED: uncharacterized protein At1g04910 [Juglans regia]	uncharacterized protein At1g04910 {ECO:0000313|RefSeq:XP_018816581.1} OS=Juglans regia (English walnut) Name=LOC108987953 {ECO:0000313|RefSeq:XP_018816581.1} PE=4	Rhamnogalacturonan I rhamnosyltransferase 1 {ECO:0000303|PubMed:30082766} EC=2.4.1.351 {ECO:0000269|PubMed:30082766} O-fucosyltransferase 34 {ECO:0000305} Short=O-FucT-34 {ECO:0000305} O-fucosyltransferase family protein {ECO:0000312|EMBL:ARJ31449.1} OS=Arabidopsis thaliana (Mouse-ear cress) ORFNames=F14F8.120 {ECO:0000312|EMBL:CAC01773.1} PE=1	GDP-fucose protein O-fucosyltransferase	[S] LSE0400 A Predicted auxin-independent growth regulator	N/A	IPR019378; GDP-fucose protein O-fucosyltransferase
HLJ619_peak_627	627	tig00007059	328372	328948	577	*	Cor0092450.1	6.60738	Promoter (1-2kb)	-1.40701	4.69992e-12	down	N/A	GO:0016021//cellular_component integral component of membrane	PREDICTED: phosphate transporter PHO1 homolog 9-like [Juglans regia]	phosphate transporter PHO1 homolog 9-like {ECO:0000313|RefSeq:XP_018813963.1} OS=Juglans regia (English walnut) Name=LOC108985941 {ECO:0000313|RefSeq:XP_018813963.1} PE=4	Phosphate transporter PHO1 homolog 3 Protein PHO1 homolog 3 Short=AtPHO1 OS=Arabidopsis thaliana (Mouse-ear cress) ORFNames=F16A14.26, F7A19.13 PE=2	SPX domain	[U] KOG1162 Predicted small molecule transporter	N/A	IPR004342; EXS, C-terminal
HLJ619_peak_629	629	tig00007059	1108238	1108682	445	*	Cor0093210.1	4.93253	Exon (Cor0093220.1/Cor0093220, exon 26 of 30)	-1.55448	0	down	K01535//H+-transporting ATPase [EC:3.6.3.6]	GO:0016021//cellular_component integral component of membrane	PREDICTED: ATPase 4, plasma membrane-type [Ziziphus jujuba]	Plasma membrane ATPase {ECO:0000256|RuleBase:RU362083} EC=7.1.2.1 {ECO:0000256|RuleBase:RU362083} OS=Corchorus olitorius ORFNames=COLO4_25205 {ECO:0000313|EMBL:OMO77402.1} PE=3	Plasma membrane ATPase 1 EC=7.1.2.1 Proton pump 1 OS=Nicotiana plumbaginifolia (Leadwort-leaved tobacco) (Tex-Mex tobacco) Name=PMA1 PE=2	E1-E2 ATPase	[P] KOG0205 Plasma membrane H+-transporting ATPase	N/A	IPR004014; Cation-transporting P-type ATPase, N-terminal
HLJ619_peak_631	631	tig00007059	1145206	1145909	704	*	Cor0093250.1	3.78873	Promoter (<=1kb)	-1.61706	4.17367e-228	down	N/A	N/A	PREDICTED: uncharacterized protein LOC108992770 [Juglans regia]	Uncharacterized protein {ECO:0000313|EMBL:SPD22239.1} OS=Fagus sylvatica (Beechnut) ORFNames=FSB_LOCUS50121 {ECO:0000313|EMBL:SPD22239.1} PE=4	N/A	Domain of unknown function (DUF569)	[X] LSE1344 A Unnamed protein	N/A	IPR007679; Domain of unknown function DUF569
HLJ619_peak_634	634	tig00007059	1648858	1649286	429	*	Cor0093910.1	4.18277	Distal Intergenic	-1.05906	2.64436e-113	down	K03240//translation initiation factor eIF-2B subunit epsilon	GO:0005515//molecular_function protein binding;GO:0009058//biological_process biosynthetic process;GO:0016779//molecular_function nucleotidyltransferase activity	PREDICTED: translation initiation factor eIF-2B subunit epsilon isoform X1 [Juglans regia] >XP_018825633.1 PREDICTED: translation initiation factor eIF-2B subunit epsilon isoform X1 [Juglans regia] >XP_018825634.1 PREDICTED: translation initiation factor eIF-2B subunit epsilon isoform X1 [Juglans regia]	translation initiation factor eIF-2B subunit epsilon isoform X1 {ECO:0000313|RefSeq:XP_018825631.1, ECO:0000313|RefSeq:XP_018825633.1, ECO:0000313|RefSeq:XP_018825634.1} OS=Juglans regia (English walnut) ECO:0000313|RefSeq:XP_018825633.1, ECO:0000313|RefSeq:XP_018825634.1} PE=4	N/A	Bacterial transferase hexapeptide (six repeats)	[J] KOG1461 Translation initiation factor 2B, epsilon subunit (eIF-2Bepsilon/GCD6)	N/A	IPR005835; Nucleotidyl transferase domain
HLJ619_peak_645	645	tig00007063	146726	147109	384	*	Cor0201960.1	4.6382	Promoter (2-3kb)	-1.16143	1.49784e-194	down	K01191//alpha-mannosidase [EC:3.2.1.24]	GO:0004559//molecular_function alpha-mannosidase activity;GO:0006013//biological_process mannose metabolic process	PREDICTED: alpha-mannosidase At3g26720-like [Juglans regia]	Alpha-mannosidase {ECO:0000256|RuleBase:RU361199} EC=3.2.1.- {ECO:0000256|RuleBase:RU361199} OS=Juglans regia (English walnut) Name=LOC109001289 {ECO:0000313|RefSeq:XP_018834052.1} PE=3	Alpha-mannosidase At3g26720 {ECO:0000305} EC=3.2.1.24 {ECO:0000269|PubMed:16233119} Precursor OS=Arabidopsis thaliana (Mouse-ear cress) ORFNames=MLJ15.11 {ECO:0000312|EMBL:BAB01735.1} PE=1	Glycosyl hydrolases family 38 N-terminal domain	[G] KOG1959 Glycosyl hydrolase, family 38 - alpha-mannosidase	N/A	IPR015341; Glycoside hydrolase family 38, central domain
HLJ619_peak_647	647	tig00007070	875183	875535	353	*	Cor0102760.1	3.1558	Promoter (2-3kb)	-1.36055	6.07921e-21	down	N/A	GO:0043531//molecular_function ADP binding	PREDICTED: putative disease resistance RPP13-like protein 3 [Ziziphus jujuba]	Uncharacterized protein {ECO:0000313|EMBL:SPD05790.1} OS=Fagus sylvatica (Beechnut) ORFNames=FSB_LOCUS33672 {ECO:0000313|EMBL:SPD05790.1} PE=3	Disease resistance protein RPP13 Resistance to Peronospora parasitica protein 13 OS=Arabidopsis thaliana (Mouse-ear cress) Name=RPP13 OrderedLocusNames=At3g46530 ORFNames=F12A12.50 PE=2	NB-ARC domain	[T] KOG4658 Apoptotic ATPase	N/A	IPR002182; NB-ARC
HLJ619_peak_648	648	tig00007070	1442048	1442403	356	*	Cor0103430.1	3.88476	Promoter (<=1kb)	-1.47221	1.5069e-120	down	N/A	N/A	PREDICTED: mechanosensitive ion channel protein 8-like [Prunus mume]	Mechanosensitive ion channel protein {ECO:0000256|PIRNR:PIRNR017209} OS=Prunus persica (Peach) (Amygdalus persica) PRUPE_ppa001779mg {ECO:0000313|EMBL:EMJ23158.1} PE=3	Mechanosensitive ion channel protein 8 {ECO:0000303|Ref.4} Mechanosensitive channel of small conductance-like 8 {ECO:0000303|Ref.4} MscS-Like protein 8 {ECO:0000303|Ref.4} OS=Arabidopsis thaliana (Mouse-ear cress) ORFNames=F6P23.17 {ECO:0000312|EMBL:AEC06572.2} PE=2	N/A	[M] KOG4629 Predicted mechanosensitive ion channel	N/A	N/A
HLJ619_peak_652	652	tig00007070	1980745	1981310	566	*	Cor0104010.1	4.62653	Downstream (2-3kb)	-1.25467	0.0136344	down	N/A	GO:0016788//molecular_function hydrolase activity, acting on ester bonds	PREDICTED: GDSL esterase/lipase EXL3-like [Juglans regia]	GDSL esterase/lipase EXL3-like {ECO:0000313|RefSeq:XP_018847896.1} OS=Juglans regia (English walnut) Name=LOC109011237 {ECO:0000313|RefSeq:XP_018847896.1} PE=3	GDSL esterase/lipase EXL3 EC=3.1.1.- Family II extracellular lipase 3 Short=Family II lipase EXL3 Precursor OS=Arabidopsis thaliana (Mouse-ear cress) Name=EXL3 OrderedLocusNames=At1g75900 ORFNames=T4O12.13 PE=2	GDSL-like Lipase/Acylhydrolase	[RI] LSE0388 A Predicted lipase	N/A	IPR001087; GDSL lipase/esterase
HLJ619_peak_662	662	tig00007074	1688891	1689260	370	*	Cor0111010.1	3.98223	Promoter (<=1kb)	-1.69409	6.27325e-59	down	N/A	N/A	hypothetical protein L484_001734 [Morus notabilis] >EXB63116.1 hypothetical protein L484_001734 [Morus notabilis]	Uncharacterized protein {ECO:0000313|EMBL:SPC76176.1} OS=Fagus sylvatica (Beechnut) ORFNames=FSB_LOCUS4058 {ECO:0000313|EMBL:SPC76176.1} PE=4	N/A	N/A	N/A	N/A	N/A
HLJ619_peak_674	674	tig00007080	1597858	1598798	941	*	Cor0128360.1	4.66473	Distal Intergenic	-1.75895	3.72836e-24	down	N/A	GO:0046983//molecular_function protein dimerization activity	PREDICTED: transcription factor bHLH35 [Ziziphus jujuba]	Uncharacterized protein {ECO:0000313|EMBL:SPC94084.1} OS=Fagus sylvatica (Beechnut) ORFNames=FSB_LOCUS21966 {ECO:0000313|EMBL:SPC94084.1} PE=4	Transcription factor bHLH35 Basic helix-loop-helix protein 35 Short=AtbHLH35 Short=bHLH 35 Transcription factor EN 41 bHLH transcription factor bHLH035 OS=Arabidopsis thaliana (Mouse-ear cress) ORFNames=MUL3.10 PE=2	N/A	[KT] LSE0107 A bHLH transcription factor	N/A	IPR011598; Myc-type, basic helix-loop-helix (bHLH) domain
HLJ619_peak_681	681	tig00007084	1010622	1011104	483	*	Cor0151580.1	3.34622	Promoter (1-2kb)	-1.60525	0.0134133	down	N/A	GO:0016491//molecular_function oxidoreductase activity;GO:0055114//biological_process oxidation-reduction process	PREDICTED: probable 2-oxoglutarate/Fe(II)-dependent dioxygenase [Citrus sinensis]	Uncharacterized protein {ECO:0000313|EMBL:ESR34079.1} OS=Citrus clementina ORFNames=CICLE_v10005336mg {ECO:0000313|EMBL:ESR34079.1} PE=3	Protein DMR6-LIKE OXYGENASE 2 {ECO:0000303|PubMed:25376907} EC=1.14.11.- {ECO:0000255|PROSITE-ProRule:PRU00805} 2-oxoglutarate (2OG)-Fe(II) oxygenase-like protein DLO2 {ECO:0000303|PubMed:25376907} Salicylate 3-hydroxylase DLO2 {ECO:0000305} Short=S3H DLO2 {ECO:0000305} Short=SA 3-hydroxylase DLO2 {ECO:0000305} Short=Salicylic acid 3-hydroxylase DLO2 {ECO:0000305} EC=1.14.13.- {ECO:0000250|UniPro…	non-haem dioxygenase in morphine synthesis N-terminal	[QR] KOG0143 Iron/ascorbate family oxidoreductases	N/A	IPR026992; Non-haem dioxygenase N-terminal domain
HLJ619_peak_685	685	tig00007086	692469	692795	327	*	Cor0176800.1	3.16005	Distal Intergenic	-1.55781	7.23644e-228	down	N/A	N/A	PREDICTED: protein EXORDIUM-like 2 [Juglans regia]	Uncharacterized protein {ECO:0000313|EMBL:SPD01811.1} OS=Fagus sylvatica (Beechnut) ORFNames=FSB_LOCUS29693 {ECO:0000313|EMBL:SPD01811.1} PE=4	Protein EXORDIUM-like 2 Precursor OS=Arabidopsis thaliana (Mouse-ear cress) Name=EXL2 OrderedLocusNames=At5g64260 ORFNames=MSJ1.10 PE=2	Phosphate-induced protein 1 conserved region	[X] LSE1222 A Unnamed protein	N/A	IPR006766; Protein EXORDIUM-like
HLJ619_peak_686	686	tig00007088	124499	125101	603	*	Cor0179570.1	3.30732	Distal Intergenic	-2.16507	2.7453e-29	down	N/A	GO:0008152//biological_process metabolic process;GO:0016758//molecular_function transferase activity, transferring hexosyl groups	7-deoxyloganetin glucosyltransferase [Ananas comosus]	7-deoxyloganetin glucosyltransferase {ECO:0000313|EMBL:RDX96332.1} OS=Mucuna pruriens (Velvet bean) (Dolichos pruriens) ORFNames=CR513_21018 {ECO:0000313|EMBL:RDX96332.1} PE=3	7-deoxyloganetin glucosyltransferase EC=2.4.1.324 Genipin glucosyltransferase UDP-glucose glucosyltransferase 2 Short=GjUGT2 UDP-glycosyltransferase 85A24 OS=Gardenia jasminoides (Cape jasmine) (Gardenia augusta) Name=UGT85A24 Synonyms=UGT2 PE=1	UDP-glucoronosyl and UDP-glucosyl transferase	[GC] KOG1192 UDP-glucuronosyl and UDP-glucosyl transferase	N/A	IPR002213; UDP-glucuronosyl/UDP-glucosyltransferase
HLJ619_peak_694	694	tig00007094	759659	760170	512	*	Cor0051840.1	3.94171	Promoter (<=1kb)	-2.81193	3.36011e-99	down	K17893//ubiquinol oxidase [EC:1.10.3.11]	GO:0009916//molecular_function alternative oxidase activity;GO:0055114//biological_process oxidation-reduction process	mitochondrial alternative oxidase 1A [Corylus heterophylla]	Ubiquinol oxidase {ECO:0000256|RuleBase:RU003779} EC=1.10.3.11 {ECO:0000256|RuleBase:RU003779} OS=Corylus heterophylla PE=2	Ubiquinol oxidase, mitochondrial EC=1.10.3.11 Alternative oxidase Precursor OS=Mangifera indica (Mango) Name=AOMI 1 PE=1	Alternative oxidase	[X] LSE1279 A Unnamed protein	N/A	IPR002680; Alternative oxidase
HLJ619_peak_703	703	tig00007094	1688526	1688979	454	*	Cor0052070.1	3.34339	Distal Intergenic	-3.29096	1.32477e-194	down	N/A	N/A	Uncharacterized protein TCM_011176 [Theobroma cacao]	Uncharacterized protein {ECO:0000313|EMBL:SPC77812.1} OS=Fagus sylvatica (Beechnut) ORFNames=FSB_LOCUS5694 {ECO:0000313|EMBL:SPC77812.1} PE=4	N/A	N/A	[X] LSE1651 A Unnamed protein	N/A	N/A
HLJ619_peak_721	721	tig00007103	1785207	1785829	623	*	Cor0027430.1	3.85662	Distal Intergenic	-1.48561	1.79738e-77	down	N/A	GO:0016021//cellular_component integral component of membrane	PREDICTED: uncharacterized protein LOC109012254 [Juglans regia]	uncharacterized protein LOC109012254 {ECO:0000313|RefSeq:XP_018849334.1} OS=Juglans regia (English walnut) Name=LOC109012254 {ECO:0000313|RefSeq:XP_018849334.1} PE=4	Sulfite exporter TauE/SafE family protein 3 {ECO:0000312|EMBL:AEC07746.1} OS=Arabidopsis thaliana (Mouse-ear cress) F3N11 {ECO:0000312|EMBL:AAM15102.1} PE=2	Sulfite exporter TauE/SafE	[X] LSE1257 A Unnamed protein	N/A	IPR002781; Transmembrane protein TauE-like
HLJ619_peak_724	724	tig00007103	2881968	2882516	549	*	Cor0027860.1	3.94475	Promoter (<=1kb)	-1.76679	7.04288e-32	down	N/A	N/A	N/A	Uncharacterized protein {ECO:0000313|EMBL:PQQ09484.1} OS=Prunus yedoensis var. nudiflora ORFNames=Pyn_05761 {ECO:0000313|EMBL:PQQ09484.1} PE=4	N/A	N/A	N/A	N/A	N/A
HLJ619_peak_741	741	tig00007107	616757	617226	470	*	Cor0152090.1	3.98223	Distal Intergenic	-2.83063	9.74949e-09	down	N/A	GO:0003677//molecular_function DNA binding;GO:0046983//molecular_function protein dimerization activity;GO:0003700//molecular_function DNA-binding transcription factor activity;GO:0005634//cellular_component nucleus;GO:0006355//biological_process regulation of transcription, DNA-templated	SOC1 [Carya cathayensis]	SOC1 {ECO:0000313|EMBL:AHI85950.1} OS=Carya cathayensis Name=SOC1 {ECO:0000313|EMBL:AHI85950.1} PE=2	MADS-box protein SOC1 Agamous-like MADS-box protein AGL20 Protein SUPPRESSOR OF CONSTANS OVEREXPRESSION 1 OS=Arabidopsis thaliana (Mouse-ear cress) ORFNames=F17K2.19 PE=1	SRF-type transcription factor (DNA-binding and dimerisation domain)	[K] KOG0014 MADS box transcription factor	http://plntfdb.bio.uni-potsdam.de/v3.0/fam_mem.php?family_id=MADS	IPR002487; Transcription factor, K-box
HLJ619_peak_742	742	tig00007107	668551	668940	390	*	Cor0152110.1	3.14447	Distal Intergenic	-1.56819	7.02991e-280	down	K09264//MADS-box transcription factor, plant	GO:0003677//molecular_function DNA binding;GO:0046983//molecular_function protein dimerization activity;GO:0003700//molecular_function DNA-binding transcription factor activity;GO:0005634//cellular_component nucleus;GO:0006355//biological_process regulation of transcription, DNA-templated	PREDICTED: agamous-like MADS-box protein AGL6 [Theobroma cacao]	AGAMOUS LIKE6-like protein {ECO:0000313|EMBL:EOX96140.1} OS=Theobroma cacao (Cacao) (Cocoa) ORFNames=TCM_005458 {ECO:0000313|EMBL:EOX96140.1} PE=4	MADS-box transcription factor 6 OsMADS6 Protein MOSAIC FLORAL ORGANS 1 OS=Oryza sativa subsp. japonica (Rice) ORFNames=OJ1123_G04.6, OsJ_07942 PE=1	SRF-type transcription factor (DNA-binding and dimerisation domain)	[K] KOG0014 MADS box transcription factor	http://plntfdb.bio.uni-potsdam.de/v3.0/fam_mem.php?family_id=MADS	IPR002487; Transcription factor, K-box
HLJ619_peak_753	753	tig00007111	617601	618084	484	*	Cor0017530.1	3.32098	Intron (Cor0017530.1/Cor0017530, intron 5 of 15)	-2.11717	1.04457e-15	down	K08472//mlo protein	GO:0006952//biological_process defense response;GO:0016021//cellular_component integral component of membrane	PREDICTED: MLO-like protein 6 [Juglans regia]	MLO-like protein {ECO:0000256|RuleBase:RU280816} OS=Juglans regia (English walnut) Synonyms=MLO {ECO:0000256|RuleBase:RU280816} PE=3	MLO-like protein 6 Short=AtMlo6 OS=Arabidopsis thaliana (Mouse-ear cress) Name=MLO6 OrderedLocusNames=At1g61560 ORFNames=T25B24.9 PE=2	Mlo family	[R] LSE0264 A Seven transmembrane protein Mlo	N/A	IPR004326; Mlo-related protein
HLJ619_peak_757	757	tig00007111	1184912	1185650	739	*	Cor0018150.1	3.95007	Promoter (<=1kb)	-1.83083	1.56681e-118	down	K01859//chalcone isomerase [EC:5.5.1.6]	GO:0016872//molecular_function intramolecular lyase activity	chalcone isomerase [Rosa rugosa] >ALR74721.1 chalcone--flavonone isomerase, partial [Rosa rugosa]	Chalcone-flavonone isomerase family protein {ECO:0000256|RuleBase:RU361158} OS=Fagus sylvatica (Beechnut) ORFNames=FSB_LOCUS1105 {ECO:0000313|EMBL:SPC73223.1} PE=3	Chalcone--flavonone isomerase 2 Short=Chalcone isomerase 2 EC=5.5.1.6 OS=Fragaria ananassa (Strawberry) (Fragaria chiloensis x Fragaria virginiana) Name=CHI2 Synonyms=FrCHI17 PE=2	Chalcone-flavanone isomerase	[X] LSE1451 A Unnamed protein	N/A	IPR016087; Chalcone isomerase
HLJ619_peak_763	763	tig00007111	2622999	2623544	546	*	Cor0019330.1	4.08131	Promoter (<=1kb)	-1.3357	1.7842e-78	down	N/A	GO:0004672//molecular_function protein kinase activity;GO:0005524//molecular_function ATP binding;GO:0006468//biological_process protein phosphorylation;GO:0030246//molecular_function carbohydrate binding	PREDICTED: L-type lectin-domain containing receptor kinase S.4-like [Juglans regia]	L-type lectin-domain containing receptor kinase S.4-like {ECO:0000313|RefSeq:XP_018814542.1} OS=Juglans regia (English walnut) Name=LOC108986380 {ECO:0000313|RefSeq:XP_018814542.1} PE=4	L-type lectin-domain containing receptor kinase S.4 {ECO:0000303|PubMed:19773388} Short=LecRK-S.4 {ECO:0000303|PubMed:19773388} EC=2.7.11.1 {ECO:0000255|PROSITE-ProRule:PRU00159} Precursor OS=Arabidopsis thaliana (Mouse-ear cress) ORFNames=T22E16.210 {ECO:0000312|EMBL:CAB75913.1} PE=2	Legume lectin domain	[T] LSE0015 A Receptor-like protein kinase, contains lectin domains	N/A	IPR001220; Legume lectin domain
HLJ619_peak_766	766	tig00007111	3383269	3383629	361	*	Cor0019730.1	6.21562	Distal Intergenic	-2.93078	0.0220598	down	N/A	N/A	hypothetical protein CICLE_v10033223mg [Citrus clementina] >ESR48826.1 hypothetical protein CICLE_v10033223mg [Citrus clementina]	Uncharacterized protein {ECO:0000313|EMBL:ESR48826.1} OS=Citrus clementina ORFNames=CICLE_v10033223mg {ECO:0000313|EMBL:ESR48826.1} PE=4	N/A	N/A	N/A	N/A	N/A
HLJ619_peak_774	774	tig00007111	4909675	4910140	466	*	Cor0021540.1	3.95007	Distal Intergenic	-1.75794	0.00167656	down	N/A	N/A	N/A	Uncharacterized protein {ECO:0000313|EMBL:SPC78547.1} OS=Fagus sylvatica (Beechnut) ORFNames=FSB_LOCUS6429 {ECO:0000313|EMBL:SPC78547.1} PE=4	N/A	N/A	N/A	N/A	N/A
HLJ619_peak_775	775	tig00007111	4933692	4934122	431	*	Cor0021580.1	3.13563	Promoter (1-2kb)	-2.88112	3.57797e-130	down	N/A	GO:0005576//cellular_component extracellular region;GO:0009664//biological_process plant-type cell wall organization	expansin 2, partial [Ziziphus jujuba]	Expansin {ECO:0000256|RuleBase:RU365023} Fragment OS=Ziziphus jujuba (Chinese jujube) (Ziziphus sativa) PE=2	Expansin-A8 Short=AtEXPA8 Alpha-expansin-8 Short=At-EXP8 Short=AtEx8 Ath-ExpAlpha-1.11 Precursor OS=Arabidopsis thaliana (Mouse-ear cress) ORFNames=T2P4.4 PE=2	Lytic transglycolase	[M] LSE0349 A Expansin	N/A	IPR009009; RlpA-like protein, double-psi beta-barrel domain
HLJ619_peak_780	780	tig00007112	492478	492824	347	*	Cor0007860.1	3.24689	Distal Intergenic	-3.02862	1.17959e-117	down	N/A	GO:0005515//molecular_function protein binding	PREDICTED: somatic embryogenesis receptor kinase 1-like [Juglans regia]	somatic embryogenesis receptor kinase 1-like {ECO:0000313|RefSeq:XP_018843944.1} OS=Juglans regia (English walnut) Name=LOC109008340 {ECO:0000313|RefSeq:XP_018843944.1} PE=4	Leucine-rich repeat protein 1 {ECO:0000250|UniProtKB:Q5VQP7} Short=OsLRR1 {ECO:0000250|UniProtKB:Q5VQP7} Precursor OS=Oryza sativa subsp. indica (Rice) ORFNames=OsI_04146 {ECO:0000312|EMBL:EEC71674.1} PE=3	Leucine rich repeat N-terminal domain	[R] KOG0619 FOG: Leucine rich repeat	N/A	IPR013210; Leucine-rich repeat-containing N-terminal, plant-type
HLJ619_peak_782	782	tig00007112	761818	762255	438	*	Cor0008160.1	4.41888	Distal Intergenic	-2.98211	1.91696e-217	down	N/A	GO:0003677//molecular_function DNA binding;GO:0005634//cellular_component nucleus	SBP-box transcription factor [Betula luminifera]	SBP-box transcription factor {ECO:0000313|EMBL:AUO16103.1} OS=Betula luminifera Name=SPL18 {ECO:0000313|EMBL:AUO16103.1} PE=2	Squamosa promoter-binding-like protein 13A OS=Arabidopsis thaliana (Mouse-ear cress) ORFNames=MBA10.13 PE=2	SBP domain	[X] LSE1212 A Unnamed protein	http://plntfdb.bio.uni-potsdam.de/v3.0/fam_mem.php?family_id=SBP	IPR004333; SBP domain
HLJ619_peak_785	785	tig00007112	1817302	1817812	511	*	Cor0009260.1	3.72429	Promoter (<=1kb)	-2.1304	3.24437e-141	down	N/A	N/A	PREDICTED: protein WVD2-like 7 isoform X1 [Juglans regia]	protein WVD2-like 7 isoform X1 {ECO:0000313|RefSeq:XP_018820068.1} OS=Juglans regia (English walnut) Name=LOC108990528 {ECO:0000313|RefSeq:XP_018820068.1} PE=4	N/A	N/A	N/A	N/A	N/A
HLJ619_peak_792	792	tig00007112	3422001	3422338	338	*	Cor0011160.1	3.93462	Promoter (1-2kb)	-1.88226	1.24112e-16	down	K14664//IAA-amino acid hydrolase [EC:3.5.1.-]	GO:0008152//biological_process metabolic process;GO:0016787//molecular_function hydrolase activity	PREDICTED: IAA-amino acid hydrolase ILR1-like 1 [Juglans regia]	Uncharacterized protein {ECO:0000313|EMBL:SPC72228.1} OS=Fagus sylvatica (Beechnut) ORFNames=FSB_LOCUS110 {ECO:0000313|EMBL:SPC72228.1} PE=4	IAA-amino acid hydrolase ILR1-like 1 EC=3.5.1.- Precursor OS=Oryza sativa subsp. indica (Rice) Name=ILL1 Synonyms=IAR ORFNames=OsI_002388 PE=2	Peptidase dimerisation domain	[T] LSE0466 A IAA-amino acid hydrolase	N/A	IPR011650; Peptidase M20, dimerisation domain
HLJ619_peak_794	794	tig00007112	3568499	3568980	482	*	Cor0011360.1	4.0351	Promoter (<=1kb)	-2.07968	3.02653e-146	down	N/A	GO:0005874//cellular_component microtubule;GO:0008017//molecular_function microtubule binding;GO:0005515//molecular_function protein binding	PREDICTED: microtubule-associated protein TORTIFOLIA1-like isoform X2 [Juglans regia]	microtubule-associated protein TORTIFOLIA1-like isoform X2 {ECO:0000313|RefSeq:XP_018844409.1} OS=Juglans regia (English walnut) Name=LOC109008677 {ECO:0000313|RefSeq:XP_018844409.1} PE=4	TORTIFOLIA1-like protein 4 {ECO:0000303|PubMed:15324671} OS=Arabidopsis thaliana (Mouse-ear cress) T7N9.27 {ECO:0000312|EMBL:AAF79870.1} PE=2	HEAT repeat	[X] LSE1348 A Unnamed protein	N/A	IPR033337; MT-associated protein TORTIFOLIA1/SPIRAL2-like
HLJ619_peak_795	795	tig00007112	4009440	4009792	353	*	Cor0011950.1	3.85662	Promoter (<=1kb)	-3.09257	0	down	N/A	GO:0003824//molecular_function catalytic activity;GO:0005975//biological_process carbohydrate metabolic process;GO:0004556//molecular_function alpha-amylase activity;GO:0005509//molecular_function calcium ion binding	PREDICTED: alpha-amylase 3, chloroplastic-like isoform X1 [Juglans regia]	alpha-amylase 3, chloroplastic-like isoform X1 {ECO:0000313|RefSeq:XP_018812496.1} OS=Juglans regia (English walnut) Name=LOC108984868 {ECO:0000313|RefSeq:XP_018812496.1} PE=4	Alpha-amylase 3, chloroplastic {ECO:0000303|PubMed:15637061} Short=AtAMY3 {ECO:0000303|PubMed:15637061} EC=3.2.1.1 {ECO:0000269|PubMed:24089528} 1,4-alpha-D-glucan glucanohydrolase Precursor OS=Arabidopsis thaliana (Mouse-ear cress) ORFNames=T17F3.14 {ECO:0000312|EMBL:AAG52558.1} PE=1	Alpha amylase, catalytic domain	[G] KOG0471 Alpha-amylase	N/A	IPR012850; Alpha-amylase, C-terminal beta-sheet
HLJ619_peak_798	798	tig00007112	4415298	4415699	402	*	Cor0012390.1	4.77867	Promoter (<=1kb)	-1.06424	7.6569e-24	down	N/A	GO:0001164//molecular_function RNA polymerase I CORE element sequence-specific DNA binding;GO:0001187//molecular_function RNA polymerase I CORE element sequence-specific DNA binding;GO:0001188//biological_process RNA polymerase I preinitiation complex assembly;GO:0006360//biological_process transcription by RNA polymerase I;GO:0070860//cellular_component RNA polymerase I core factor complex	PREDICTED: TATA box-binding protein-associated factor RNA polymerase I subunit B [Juglans regia]	TATA box-binding protein-associated factor RNA polymerase I subunit B {ECO:0000313|RefSeq:XP_018817717.1} OS=Juglans regia (English walnut) Name=LOC108988805 {ECO:0000313|RefSeq:XP_018817717.1} PE=4	TATA box-binding protein-associated factor RNA polymerase I subunit B Central cell guidance protein Protein MATERNAL EFFECT EMBRYO ARREST 12 TATA box-binding protein-associated factor 1B Short=TBP-associated factor 1B OS=Arabidopsis thaliana (Mouse-ear cress) OrderedLocusNames=At2g02955 ORFNames=T17M13 PE=1	N/A	N/A	N/A	IPR033599; RNA polymerase I transcription initiation factor TAF1B/Rrn7
HLJ619_peak_805	805	tig00007116	150409	150918	510	*	Cor0184570.1	4.77867	Promoter (<=1kb)	-1.77669	4.1696e-122	down	K18422//helicase MOV-10 [EC:3.6.4.13]	N/A	PREDICTED: probable RNA helicase SDE3 [Juglans regia]	probable RNA helicase SDE3 {ECO:0000313|RefSeq:XP_018805837.1} OS=Juglans regia (English walnut) Name=LOC108979588 {ECO:0000313|RefSeq:XP_018805837.1} PE=4	N/A	N/A	N/A	N/A	IPR026122; Putative helicase MOV-10
HLJ619_peak_812	812	tig00007120	773232	773906	675	*	Cor0121860.1	5.34252	Intron (Cor0121860.1/Cor0121860, intron 2 of 3)	-2.35872	0	down	N/A	N/A	PREDICTED: uncharacterized protein LOC109003427 isoform X1 [Juglans regia]	uncharacterized protein LOC109003427 isoform X3 {ECO:0000313|RefSeq:XP_018837086.1} OS=Juglans regia (English walnut) Name=LOC109003427 {ECO:0000313|RefSeq:XP_018837086.1} PE=4	N/A	N/A	[X] LSE2140 A Unnamed protein	N/A	N/A
HLJ619_peak_817	817	tig00007122	332323	333160	838	*	Cor0170600.1	5.01933	Distal Intergenic	-1.78457	0.00079693	down	N/A	GO:0004672//molecular_function protein kinase activity;GO:0005524//molecular_function ATP binding;GO:0006468//biological_process protein phosphorylation	kinase-like protein, partial [Corylus avellana]	Uncharacterized protein {ECO:0000313|EMBL:SPC83703.1} OS=Fagus sylvatica (Beechnut) ORFNames=FSB_LOCUS11585 {ECO:0000313|EMBL:SPC83703.1} PE=4	Wall-associated receptor kinase-like 1 EC=2.7.11.- Precursor OS=Arabidopsis thaliana (Mouse-ear cress) Name=WAKL1 OrderedLocusNames=At1g16120 ORFNames=T24D18.20 PE=2	Protein kinase domain	[T] LSE0034 A Protein kinase, contains EGF domain	N/A	IPR000719; Protein kinase domain
HLJ619_peak_818	818	tig00007122	435030	435388	359	*	Cor0170660.1	4.98654	Intron (Cor0170660.1/Cor0170660, intron 2 of 4)	-5.20718	0.0403026	down	K08835//serine/threonine-protein kinase OSR1/STK39 [EC:2.7.11.1]	GO:0004672//molecular_function protein kinase activity;GO:0005524//molecular_function ATP binding;GO:0006468//biological_process protein phosphorylation	PREDICTED: serine/threonine-protein kinase BLUS1 [Juglans regia]	serine/threonine-protein kinase BLUS1 {ECO:0000313|RefSeq:XP_018842387.1} OS=Juglans regia (English walnut) Name=LOC109007242 {ECO:0000313|RefSeq:XP_018842387.1} PE=4	Serine/threonine-protein kinase BLUS1 EC=2.7.11.1 Protein BLUE LIGHT SIGNALING 1 OS=Arabidopsis thaliana (Mouse-ear cress) Name=BLUS1 OrderedLocusNames=At4g14480 ORFNames=dl3280c PE=1	Protein kinase domain	[T] KOG0582 Ste20-like serine/threonine protein kinase	N/A	IPR000719; Protein kinase domain
HLJ619_peak_820	820	tig00007124	338341	338676	336	*	Cor0175050.1	3.79675	Promoter (<=1kb)	-2.77191	1.45989e-30	down	N/A	GO:0016020//cellular_component membrane;GO:0022857//molecular_function transmembrane transporter activity;GO:0055085//biological_process transmembrane transport	PREDICTED: protein NRT1/ PTR FAMILY 5.2-like [Juglans regia]	protein NRT1/ PTR FAMILY 5.2-like {ECO:0000313|RefSeq:XP_018807902.1} OS=Juglans regia (English walnut) Name=LOC108981248 {ECO:0000313|RefSeq:XP_018807902.1} PE=4	Protein NRT1/ PTR FAMILY 5.2 Short=AtNPF5.2 Peptide transporter PTR3-A Short=AtPTR3 OS=Arabidopsis thaliana (Mouse-ear cress) ORFNames=MCL19.10 PE=2	POT family	[E] KOG1237 H+/oligopeptide symporter	N/A	IPR000109; Proton-dependent oligopeptide transporter family
HLJ619_peak_827	827	tig00007130	1025027	1025422	396	*	Cor0141060.1	4.18277	Distal Intergenic	-1.53426	1.19266e-15	down	K17471//sulfate transporter 3	GO:0008272//biological_process sulfate transport;GO:0015116//molecular_function sulfate transmembrane transporter activity;GO:0016021//cellular_component integral component of membrane;GO:0008271//molecular_function secondary active sulfate transmembrane transporter activity;GO:0016020//cellular_component membrane;GO:0055085//biological_process transmembrane transport	PREDICTED: sulfate transporter 3.1-like [Juglans regia]	sulfate transporter 3.1-like {ECO:0000313|RefSeq:XP_018818641.1} OS=Juglans regia (English walnut) Name=LOC108989479 {ECO:0000313|RefSeq:XP_018818641.1} PE=3	Sulfate transporter 3.1 AST12 AtST1 OS=Arabidopsis thaliana (Mouse-ear cress) ORFNames=ATEM1.15, F4F15.10 PE=2	Sulfate permease family	[P] KOG0236 Sulfate/bicarbonate/oxalate exchanger SAT-1 and related transporters (SLC26 family)	N/A	IPR011547; SLC26A/SulP transporter domain
HLJ619_peak_829	829	tig00007130	1098035	1098418	384	*	Cor0141110.1	4.62653	Promoter (<=1kb)	-1.40738	1.86343e-153	down	N/A	N/A	PREDICTED: protein NETWORKED 1A-like [Juglans regia] >XP_018818609.1 PREDICTED: protein NETWORKED 1A-like [Juglans regia] >XP_018818610.1 PREDICTED: protein NETWORKED 1A-like [Juglans regia] >XP_018818611.1 PREDICTED: protein NETWORKED 1A-like [Juglans regia]	protein NETWORKED 1A-like {ECO:0000313|RefSeq:XP_018818608.1, ECO:0000313|RefSeq:XP_018818609.1, ECO:0000313|RefSeq:XP_018818610.1} OS=Juglans regia (English walnut) ECO:0000313|RefSeq:XP_018818611.1} PE=4	Protein NETWORKED 1B {ECO:0000303|PubMed:22840520} OS=Arabidopsis thaliana (Mouse-ear cress) ORFNames=dl3420w {ECO:0000312|EMBL:CAB10255.1} PE=2	N/A	[D] LSE0159 A Predicted centromere protein	N/A	N/A
HLJ619_peak_834	834	tig00007134	528354	529106	753	*	Cor0182940.1	4.18277	Intron (Cor0182940.1/Cor0182940, intron 7 of 13)	-1.69187	1.48682e-114	down	K08472//mlo protein	GO:0006952//biological_process defense response;GO:0016021//cellular_component integral component of membrane	PREDICTED: MLO-like protein 1 [Ziziphus jujuba]	MLO-like protein {ECO:0000256|RuleBase:RU280816} OS=Juglans regia (English walnut) Synonyms=MLO {ECO:0000256|RuleBase:RU280816} PE=3	MLO-like protein 1 Short=AtMlo1 MLO protein homolog 1 Short=AtMlo-H1 OS=Arabidopsis thaliana (Mouse-ear cress) ORFNames=T10P11.12 PE=1	Mlo family	[R] LSE0264 A Seven transmembrane protein Mlo	N/A	IPR004326; Mlo-related protein
HLJ619_peak_856	856	tig00007145	1761966	1762293	328	*	Cor0109270.1	4.74008	Distal Intergenic	-2.23171	0.00140856	down	K03283//heat shock 70kDa protein 1/8	N/A	PREDICTED: heat shock cognate 70 kDa protein-like [Juglans regia]	heat shock cognate 70 kDa protein-like {ECO:0000313|RefSeq:XP_018814453.1} OS=Juglans regia (English walnut) Name=LOC108986331 {ECO:0000313|RefSeq:XP_018814453.1} PE=3	Heat shock cognate 70 kDa protein OS=Petunia hybrida (Petunia) Name=HSP70 PE=2	Hsp70 protein	[O] KOG0101 Molecular chaperones HSP70/HSC70, HSP70 superfamily	N/A	IPR013126; Heat shock protein 70 family
HLJ619_peak_861	861	tig00007147	1320806	1321278	473	*	Cor0108330.1	3.28957	Distal Intergenic	-2.34913	7.42262e-05	down	N/A	N/A	PREDICTED: uncharacterized protein At5g23160-like [Juglans regia]	Uncharacterized protein {ECO:0000313|EMBL:SPC98297.1} OS=Fagus sylvatica (Beechnut) {ECO:0000313|EMBL:SPD21567.1} PE=4	N/A	N/A	N/A	N/A	N/A
HLJ619_peak_869	869	tig00007149	2376161	2376626	466	*	Cor0083370.1	4.18277	Intron (Cor0083360.1/Cor0083360, intron 3 of 3)	-1.35001	1.89569e-20	down	N/A	GO:0009055//molecular_function electron transfer activity	PREDICTED: uclacyanin 1-like [Juglans regia]	uclacyanin 1-like {ECO:0000313|RefSeq:XP_018857583.1} OS=Juglans regia (English walnut) Name=LOC109019688 {ECO:0000313|RefSeq:XP_018857583.1} PE=4	Uclacyanin 1 {ECO:0000303|PubMed:9761472} Precursor OS=Arabidopsis thaliana (Mouse-ear cress) ORFNames=T32F6 {ECO:0000305} PE=1	Plastocyanin-like domain	[S] LSE0042 A Uncharacterized plastocyanin-like protein, probably non-copper-binding	N/A	IPR003245; Phytocyanin domain
HLJ619_peak_872	872	tig00007151	385328	385960	633	*	Cor0141600.1	4.01713	Distal Intergenic	-1.68859	7.37668e-196	down	N/A	GO:0043531//molecular_function ADP binding	putative disease resistance protein RGA1 [Herrania umbratica]	LRR and NB-ARC domains-containing disease resistance protein, putative {ECO:0000313|EMBL:EOY01217.1} OS=Theobroma cacao (Cacao) (Cocoa) ORFNames=TCM_011164 {ECO:0000313|EMBL:EOY01217.1} PE=3	Putative disease resistance protein RGA1 RGA3-blb OS=Solanum bulbocastanum (Wild potato) Name=RGA1 Synonyms=177O13.37, CB3A14.4 PE=2	NB-ARC domain	[T] KOG4658 Apoptotic ATPase	N/A	IPR002182; NB-ARC
HLJ619_peak_873	873	tig00007151	542678	543510	833	*	Cor0141710.1	4.18277	Promoter (<=1kb)	-1.88362	1.46003e-74	down	#N/A	#N/A	#N/A	#N/A	#N/A	#N/A	#N/A	#N/A	#N/A
HLJ619_peak_883	883	tig00007160	537414	537785	372	*	Cor0160290.1	3.34622	Distal Intergenic	-1.09797	8.53668e-40	down	N/A	GO:0004190//molecular_function aspartic-type endopeptidase activity;GO:0006508//biological_process proteolysis	PREDICTED: aspartyl protease family protein 2 [Juglans regia]	aspartyl protease family protein 2 {ECO:0000313|RefSeq:XP_018805570.1} OS=Juglans regia (English walnut) Name=LOC108979356 {ECO:0000313|RefSeq:XP_018805570.1} PE=3	Aspartic proteinase NANA, chloroplast {ECO:0000303|PubMed:22987884} EC=3.4.23.- {ECO:0000269|PubMed:22987884} Precursor OS=Arabidopsis thaliana (Mouse-ear cress) ORFNames=MBK21.8 {ECO:0000312|EMBL:BAB02414.1} PE=1	Xylanase inhibitor C-terminal	[O] KOG1339 Aspartyl protease	N/A	IPR033121; Peptidase family A1 domain
HLJ619_peak_887	887	tig00007161	88774	89134	361	*	Cor0211160.1	3.34622	Distal Intergenic	-2.38637	2.40831e-293	down	N/A	GO:0004672//molecular_function protein kinase activity;GO:0005524//molecular_function ATP binding;GO:0006468//biological_process protein phosphorylation	probable leucine-rich repeat receptor-like protein kinase At5g49770 [Herrania umbratica]	Uncharacterized protein {ECO:0000313|EMBL:KJB29747.1} OS=Gossypium raimondii (New World cotton) ORFNames=B456_005G116800 {ECO:0000313|EMBL:KJB29747.1} PE=3	Probable leucine-rich repeat receptor-like protein kinase At5g49770 EC=2.7.11.1 Precursor OS=Arabidopsis thaliana (Mouse-ear cress) OrderedLocusNames=At5g49770 ORFNames=K2I5.14 PE=1	Protein tyrosine kinase	[T] LSE0002 A Receptor protein kinase containing LRR repeats	N/A	IPR013210; Leucine-rich repeat-containing N-terminal, plant-type
HLJ619_peak_894	894	tig00007165	346658	346994	337	*	Cor0060620.1	4.22789	Promoter (1-2kb)	-2.37236	0	down	K14505//cyclin D3, plant	GO:0005634//cellular_component nucleus	PREDICTED: cyclin-D3-2 isoform X2 [Juglans regia]	Uncharacterized protein {ECO:0000313|EMBL:SPC85405.1} OS=Fagus sylvatica (Beechnut) ORFNames=FSB_LOCUS13287 {ECO:0000313|EMBL:SPC85405.1} PE=3	Cyclin-D3-3 G1/S-specific cyclin-D3-3 Short=CycD3 OS=Arabidopsis thaliana (Mouse-ear cress) Name=CYCD3-3 OrderedLocusNames=At3g50070 ORFNames=F3A4.150 PE=2	Cyclin, C-terminal domain	[D] KOG0656 G1/S-specific cyclin D	N/A	IPR013763; Cyclin-like
HLJ619_peak_904	904	tig00007165	1394060	1394388	329	*	Cor0061770.1	3.2053	Promoter (<=1kb)	-1.00631	2.34895e-11	down	N/A	N/A	PREDICTED: protein O-glucosyltransferase 1-like isoform X1 [Juglans regia]	protein O-glucosyltransferase 1-like isoform X1 {ECO:0000313|RefSeq:XP_018840308.1} OS=Juglans regia (English walnut) Name=LOC109005717 {ECO:0000313|RefSeq:XP_018840308.1} PE=4	N/A	Glycosyl transferase family 90	[R] KOG2458 Endoplasmic reticulum protein EP58, contains filamin rod domain and KDEL motif	N/A	IPR006598; Lipopolysaccharide-modifying protein
HLJ619_peak_907	907	tig00007167	90884	91255	372	*	Cor0156570.1	3.34622	Distal Intergenic	-3.15894	1.48908e-125	down	K05391//cyclic nucleotide gated channel, other eukaryote	GO:0005515//molecular_function protein binding;GO:0005216//molecular_function ion channel activity;GO:0006811//biological_process ion transport;GO:0016020//cellular_component membrane;GO:0055085//biological_process transmembrane transport	cyclic nucleotide-gated ion channel 1-like isoform X1 [Prunus avium]	Voltage dependent potassium channel {ECO:0000313|EMBL:PON98026.1} OS=Trema orientale (Charcoal tree) (Celtis orientalis) ORFNames=TorRG33x02_061000 {ECO:0000313|EMBL:PON98026.1} PE=4	Probable cyclic nucleotide-gated ion channel 10 CaM-regulated potassium ion channel Cyclic nucleotide- and calmodulin-regulated ion channel 10 OS=Arabidopsis thaliana (Mouse-ear cress) ORFNames=F6F3.13 PE=2	Ion transport protein	[PT] KOG0498 K+-channel ERG and related proteins, contain PAS/PAC sensor domain	N/A	IPR005821; Ion transport domain
HLJ619_peak_913	913	tig00007167	595109	595491	383	*	Cor0157080.1	3.62777	Promoter (<=1kb)	-1.52195	1.76346e-54	down	N/A	GO:0005515//molecular_function protein binding	PREDICTED: U-box domain-containing protein 44-like [Juglans regia] >XP_018846752.1 PREDICTED: U-box domain-containing protein 44-like [Juglans regia]	RING-type E3 ubiquitin transferase {ECO:0000256|SAAS:SAAS00702733} EC=2.3.2.27 {ECO:0000256|SAAS:SAAS00702733} OS=Fagus sylvatica (Beechnut) ORFNames=FSB_LOCUS57682 {ECO:0000313|EMBL:SPD29800.1} PE=4	N/A	Armadillo/beta-catenin-like repeat	N/A	N/A	IPR000225; Armadillo
HLJ619_peak_914	914	tig00007167	611886	612353	468	*	Cor0157100.1	3.18578	Promoter (2-3kb)	-2.55914	1.94752e-24	down	K07904//Ras-related protein Rab-11A	GO:0003924//molecular_function GTPase activity;GO:0005525//molecular_function GTP binding	PREDICTED: ras-related protein RABA3 [Juglans regia]	ras-related protein RABA3 {ECO:0000313|RefSeq:XP_018814811.1} OS=Juglans regia (English walnut) Name=LOC108986596 {ECO:0000313|RefSeq:XP_018814811.1} PE=4	Ras-related protein RABA3 Short=AtRABA3 OS=Arabidopsis thaliana (Mouse-ear cress) Name=RABA3 OrderedLocusNames=At1g01200 ORFNames=F6F3.1 PE=2	Ras family	[U] KOG0087 GTPase Rab11/YPT3, small G protein superfamily	N/A	IPR001806; Small GTPase superfamily
HLJ619_peak_915	915	tig00007167	677969	678537	569	*	Cor0157180.1	3.34622	Intron (Cor0157170.1/Cor0157170, intron 5 of 7)	-1.87743	5.73456e-25	down	N/A	GO:0005506//molecular_function iron ion binding;GO:0016705//molecular_function oxidoreductase activity, acting on paired donors, with incorporation or reduction of molecular oxygen;GO:0020037//molecular_function heme binding;GO:0055114//biological_process oxidation-reduction process	PREDICTED: cytochrome P450 78A3-like [Juglans regia]	Uncharacterized protein {ECO:0000313|EMBL:SPD26986.1} OS=Fagus sylvatica (Beechnut) ORFNames=FSB_LOCUS54868 {ECO:0000313|EMBL:SPD26986.1} PE=3	Cytochrome P450 78A3 EC=1.14.-.- OS=Glycine max (Soybean) (Glycine hispida) Name=CYP78A3 PE=2	Cytochrome P450	[Q] KOG0156 Cytochrome P450 CYP2 subfamily	N/A	IPR002401; Cytochrome P450, E-class, group I
HLJ619_peak_921	921	tig00007169	2430634	2431221	588	*	Cor0047570.1	3.25638	Distal Intergenic	-1.92267	3.84177e-62	down	K14664//IAA-amino acid hydrolase [EC:3.5.1.-]	GO:0008152//biological_process metabolic process;GO:0016787//molecular_function hydrolase activity	PREDICTED: IAA-amino acid hydrolase ILR1-like 4 [Juglans regia]	IAA-amino acid hydrolase ILR1-like 4 {ECO:0000313|RefSeq:XP_018808806.1} OS=Juglans regia (English walnut) Name=LOC108981999 {ECO:0000313|RefSeq:XP_018808806.1} PE=4	IAA-amino acid hydrolase ILR1-like 1 EC=3.5.1.- Precursor OS=Oryza sativa subsp. indica (Rice) Name=ILL1 Synonyms=IAR ORFNames=OsI_002388 PE=2	Peptidase dimerisation domain	[T] LSE0466 A IAA-amino acid hydrolase	N/A	IPR011650; Peptidase M20, dimerisation domain
HLJ619_peak_935	935	tig00007171	1231878	1232242	365	*	Cor0113110.1	3.2053	Promoter (2-3kb)	-2.17337	3.94589e-206	down	K11517//(S)-2-hydroxy-acid oxidase [EC:1.1.3.15]	GO:0016491//molecular_function oxidoreductase activity	PREDICTED: peroxisomal (S)-2-hydroxy-acid oxidase GLO4-like isoform X3 [Juglans regia]	Uncharacterized protein {ECO:0000313|EMBL:SPC83490.1} OS=Fagus sylvatica (Beechnut) ORFNames=FSB_LOCUS11372 {ECO:0000313|EMBL:SPC83490.1} PE=3	Peroxisomal (S)-2-hydroxy-acid oxidase GLO4 EC=1.1.3.15 Glycolate oxidase 4 Short=AtGLO4 Short=GOX 4 Short chain alpha-hydroxy acid oxidase GLO4 OS=Arabidopsis thaliana (Mouse-ear cress) Name=GLO4 OrderedLocusNames=At3g14130 ORFNames=MAG2.2 PE=2	FMN-dependent dehydrogenase	[C] KOG0538 Glycolate oxidase	N/A	IPR037396; FMN hydroxy acid dehydrogenase domain
HLJ619_peak_936	936	tig00007171	1248600	1248964	365	*	Cor0113130.1	4.28969	Promoter (2-3kb)	-1.21394	1.11371e-34	down	K11517//(S)-2-hydroxy-acid oxidase [EC:1.1.3.15]	GO:0016491//molecular_function oxidoreductase activity	PREDICTED: peroxisomal (S)-2-hydroxy-acid oxidase GLO4-like [Juglans regia] >XP_018835017.1 PREDICTED: peroxisomal (S)-2-hydroxy-acid oxidase GLO4-like [Juglans regia] >XP_018835018.1 PREDICTED: peroxisomal (S)-2-hydroxy-acid oxidase GLO4-like [Juglans regia]	Uncharacterized protein {ECO:0000313|EMBL:SPD06516.1} OS=Fagus sylvatica (Beechnut) ORFNames=FSB_LOCUS34398 {ECO:0000313|EMBL:SPD06516.1} PE=3	Peroxisomal (S)-2-hydroxy-acid oxidase GLO4 EC=1.1.3.15 Glycolate oxidase 4 Short=AtGLO4 Short=GOX 4 Short chain alpha-hydroxy acid oxidase GLO4 OS=Arabidopsis thaliana (Mouse-ear cress) Name=GLO4 OrderedLocusNames=At3g14130 ORFNames=MAG2.2 PE=2	FMN-dependent dehydrogenase	[C] KOG0538 Glycolate oxidase	N/A	IPR037396; FMN hydroxy acid dehydrogenase domain
HLJ619_peak_943	943	tig00007173	376576	377009	434	*	Cor0189220.1	5.66741	Distal Intergenic	-2.35232	9.69613e-262	down	N/A	N/A	PREDICTED: uncharacterized protein LOC108982874 [Juglans regia]	uncharacterized protein LOC108982874 {ECO:0000313|RefSeq:XP_018809890.1} OS=Juglans regia (English walnut) Name=LOC108982874 {ECO:0000313|RefSeq:XP_018809890.1} PE=4	N/A	N/A	N/A	N/A	N/A
HLJ619_peak_952	952	tig00007182	275023	275755	733	*	Cor0144610.1	3.7675	Distal Intergenic	-3.29567	3.99499e-09	down	N/A	N/A	Membrane lipoprotein, putative [Theobroma cacao]	Membrane lipoprotein, putative {ECO:0000313|EMBL:EOY02178.1} OS=Theobroma cacao (Cacao) (Cocoa) ORFNames=TCM_011888 {ECO:0000313|EMBL:EOY02178.1} PE=4	Protein IDA {ECO:0000303|PubMed:12972671} Protein INFLORESCENCE DEFICIENT IN ABSCISSION {ECO:0000303|PubMed:12972671} Precursor OS=Arabidopsis thaliana (Mouse-ear cress) ORFNames=F14K14 {ECO:0000312|EMBL:AC011914} PE=1	N/A	N/A	N/A	N/A
HLJ619_peak_961	961	tig00007184	2153488	2154127	640	*	Cor0072930.1	3.83614	Distal Intergenic	-2.70976	3.25737e-05	down	N/A	GO:0048544//biological_process recognition of pollen	G-type lectin S-receptor-like serine/threonine-protein kinase LECRK3 isoform X1 [Hevea brasiliensis]	Uncharacterized protein {ECO:0000313|EMBL:SPC75187.1} OS=Fagus sylvatica (Beechnut) ORFNames=FSB_LOCUS3069 {ECO:0000313|EMBL:SPC75187.1} PE=4	G-type lectin S-receptor-like serine/threonine-protein kinase LECRK4 {ECO:0000305} Short=OsLecRK4 {ECO:0000303|PubMed:25485617} EC=2.7.11.1 {ECO:0000305} OsRLCK136 {ECO:0000305} Precursor OS=Oryza sativa subsp. indica (Rice) OSIGBa0147O06.2 {ECO:0000312|EMBL:CAH66272.1} PE=3	S-locus glycoprotein domain	[T] LSE0015 A Receptor-like protein kinase, contains lectin domains	N/A	IPR003609; PAN/Apple domain
HLJ619_peak_974	974	tig00007188	1534734	1535061	328	*	Cor0029870.1	3.1558	Distal Intergenic	-4.42753	0	down	K05909//laccase [EC:1.10.3.2]	GO:0005507//molecular_function copper ion binding;GO:0016491//molecular_function oxidoreductase activity;GO:0055114//biological_process oxidation-reduction process	putative lacasse/diphenol oxidase [Castanea mollissima] >ACV72175.1 putative laccase/diphenol oxidase [Castanea dentata]	Laccase {ECO:0000256|RuleBase:RU361119} EC=1.10.3.2 {ECO:0000256|RuleBase:RU361119} Benzenediol:oxygen oxidoreductase {ECO:0000256|RuleBase:RU361119} Diphenol oxidase {ECO:0000256|RuleBase:RU361119} Urishiol oxidase {ECO:0000256|RuleBase:RU361119} OS=Castanea dentata (American chestnut) PE=2	Putative laccase-9 EC=1.10.3.2 Benzenediol:oxygen oxidoreductase 9 Diphenol oxidase 9 Urishiol oxidase 9 Precursor OS=Oryza sativa subsp. japonica (Rice) ORFNames=OsJ_008109, P0431B06.7 PE=3	Multicopper oxidase	[Q] KOG1263 Multicopper oxidases	N/A	IPR011707; Multicopper oxidase, type 3
HLJ619_peak_976	976	tig00007188	1867529	1868672	1144	*	Cor0030030.1	5.85588	Distal Intergenic	-1.10442	4.09887e-13	down	N/A	GO:0016747//molecular_function transferase activity, transferring acyl groups other than amino-acyl groups	PREDICTED: uncharacterized acetyltransferase At3g50280-like [Juglans regia]	uncharacterized acetyltransferase At3g50280-like {ECO:0000313|RefSeq:XP_018819867.1} OS=Juglans regia (English walnut) Name=LOC108990381 {ECO:0000313|RefSeq:XP_018819867.1} PE=4	Uncharacterized acetyltransferase At3g50280 EC=2.3.1.- OS=Arabidopsis thaliana (Mouse-ear cress) OrderedLocusNames=At3g50280 ORFNames=F11C1.120 PE=3	Transferase family	[RQ] TWOG0156 Predicted anthranilate N-hydroxycinnamoyl/benzoyltransferase	N/A	IPR003480; Transferase
HLJ619_peak_982	982	tig00007188	3286137	3286663	527	*	Cor0031240.1	5.01933	Promoter (<=1kb)	-2.11826	5.8577e-102	down	N/A	N/A	PREDICTED: uncharacterized protein LOC109021512 [Juglans regia]	Uncharacterized protein {ECO:0000313|EMBL:SPC82968.1} OS=Fagus sylvatica (Beechnut) ORFNames=FSB_LOCUS10850 {ECO:0000313|EMBL:SPC82968.1} PE=4	N/A	Late embryogenesis abundant protein	[V] LSE0414 A Harpin-induced protein involved in plant hypersensitive response and related proteins	N/A	IPR004864; Late embryogenesis abundant protein, LEA-14
HLJ619_peak_991	991	tig00007192	152429	153042	614	*	Cor0097260.1	3.34622	Intron (Cor0097270.1/Cor0097270, intron 3 of 6)	-1.33869	2.42747e-234	down	N/A	GO:0055085//biological_process transmembrane transport	PREDICTED: probable metal-nicotianamine transporter YSL7 [Juglans regia]	probable metal-nicotianamine transporter YSL7 {ECO:0000313|RefSeq:XP_018849287.1} OS=Juglans regia (English walnut) Name=LOC109012213 {ECO:0000313|RefSeq:XP_018849287.1} PE=4	Probable metal-nicotianamine transporter YSL7 Protein YELLOW STRIPE LIKE 7 Short=AtYSL7 OS=Arabidopsis thaliana (Mouse-ear cress) Name=YSL7 OrderedLocusNames=At1g65730 ORFNames=F1E22.10 PE=2	OPT oligopeptide transporter protein	[PR] TWOG0118 Predicted Fe(III)-siderophore transporter	N/A	IPR004813; Oligopeptide transporter, OPT superfamily
HLJ619_peak_996	996	tig00007192	1335219	1335833	615	*	Cor0097690.1	4.93253	Distal Intergenic	-2.87226	2.33306e-24	down	N/A	N/A	PREDICTED: uncharacterized protein LOC108994284 [Juglans regia]	uncharacterized protein LOC108994284 {ECO:0000313|RefSeq:XP_018824966.1} OS=Juglans regia (English walnut) Name=LOC108994284 {ECO:0000313|RefSeq:XP_018824966.1} PE=4	N/A	Domain of unknown function (DUF4408)	[X] LSE1359 A Unnamed protein	N/A	IPR025520; Domain of unknown function DUF4408
HLJ619_peak_1002	1002	tig00007203	1303097	1303607	511	*	Cor0132830.1	5.19447	Promoter (2-3kb)	-1.4967	4.19022e-08	down	K00279//cytokinin dehydrogenase [EC:1.5.99.12]	GO:0009690//biological_process cytokinin metabolic process;GO:0019139//molecular_function cytokinin dehydrogenase activity;GO:0050660//molecular_function flavin adenine dinucleotide binding;GO:0055114//biological_process oxidation-reduction process;GO:0016614//molecular_function oxidoreductase activity, acting on CH-OH group of donors;GO:0016491//molecular_function oxidoreductase activity	PREDICTED: cytokinin dehydrogenase 2-like [Juglans regia]	Uncharacterized protein {ECO:0000313|EMBL:SPD26824.1} OS=Fagus sylvatica (Beechnut) ORFNames=FSB_LOCUS54706 {ECO:0000313|EMBL:SPD26824.1} PE=4	Cytokinin dehydrogenase 3 EC=1.5.99.12 Cytokinin oxidase 3 Short=AtCKX3 Short=CKO 3 Precursor OS=Arabidopsis thaliana (Mouse-ear cress) Name=CKX3 OrderedLocusNames=At5g56970 ORFNames=MHM17.8 PE=1	FAD binding domain	[C] KOG1231 Proteins containing the FAD binding domain	N/A	IPR016166; FAD-binding, type 2
HLJ619_peak_1003	1003	tig00007205	50359	50734	376	*	Cor0190170.1	3.16231	Distal Intergenic	-4.20998	3.99796e-175	down	N/A	GO:0003676//molecular_function nucleic acid binding;GO:0008270//molecular_function zinc ion binding	PREDICTED: myb-like protein J [Juglans regia]	myb-like protein J {ECO:0000313|RefSeq:XP_018845997.1} OS=Juglans regia (English walnut) Name=LOC109009824 {ECO:0000313|RefSeq:XP_018845997.1} PE=4	Transcription factor KUA1 {ECO:0000303|PubMed:24806884} Myb-related protein H {ECO:0000303|PubMed:23888064} Short=AtMYBH {ECO:0000303|PubMed:23888064} Short=AtMYBS3 {ECO:0000303|PubMed:25920996} Short=MYBS3-homolg protein {ECO:0000303|PubMed:25920996} Protein KUODA1 {ECO:0000303|PubMed:24806884} OS=Arabidopsis thaliana (Mouse-ear cress) ORFNames=MQL5.25 {ECO:0000312|EMBL:BAA97173.1} PE=1	Myb-like DNA-binding domain	[K] LSE0160 A Myb family transcription factor	http://plntfdb.bio.uni-potsdam.de/v3.0/fam_mem.php?family_id=MYB-related	IPR017930; Myb domain
HLJ619_peak_1007	1007	tig00007207	234603	235099	497	*	Cor0200000.1	4.09658	Distal Intergenic	-1.30149	1.25145e-14	down	K05658//ATP-binding cassette, subfamily B (MDR/TAP), member 1 [EC:3.6.3.44]	GO:0005524//molecular_function ATP binding;GO:0016887//molecular_function ATPase activity	PREDICTED: putative ABC transporter B family member 8 [Juglans regia]	putative ABC transporter B family member 8 {ECO:0000313|RefSeq:XP_018853248.1} OS=Juglans regia (English walnut) Name=LOC109015224 {ECO:0000313|RefSeq:XP_018853248.1} PE=4	Putative ABC transporter B family member 8 Short=ABC transporter ABCB.8 Short=AtABCB8 P-glycoprotein 8 Putative multidrug resistance protein 22 OS=Arabidopsis thaliana (Mouse-ear cress) ORFNames=MJI6.16 PE=5	ABC transporter	[Q] KOG0055 Multidrug/pheromone exporter, ABC superfamily	N/A	IPR003593; AAA+ ATPase domain
HLJ619_peak_1015	1015	tig00007211	520080	520453	374	*	Cor0116570.1	5.01933	Distal Intergenic	-3.46855	4.51468e-26	down	N/A	N/A	PREDICTED: uncharacterized protein LOC8268850 [Ricinus communis] >EEF48259.1 conserved hypothetical protein [Ricinus communis]	Uncharacterized protein {ECO:0000313|EMBL:EEF48259.1} OS=Ricinus communis (Castor bean) ORFNames=RCOM_1052780 {ECO:0000313|EMBL:EEF48259.1} PE=4	N/A	N/A	[X] LSE2128 A Unnamed protein	N/A	N/A
HLJ619_peak_1016	1016	tig00007211	825756	826339	584	*	Cor0116840.1	4.35333	Exon (Cor0116840.1/Cor0116840, exon 5 of 12)	-1.86075	4.88146e-09	down	K17471//sulfate transporter 3	GO:0008272//biological_process sulfate transport;GO:0015116//molecular_function sulfate transmembrane transporter activity;GO:0016021//cellular_component integral component of membrane;GO:0008271//molecular_function secondary active sulfate transmembrane transporter activity;GO:0016020//cellular_component membrane;GO:0055085//biological_process transmembrane transport;GO:1902358//biological_proce…	PREDICTED: probable sulfate transporter 3.5 [Juglans regia]	probable sulfate transporter 3.5 {ECO:0000313|RefSeq:XP_018838826.1} OS=Juglans regia (English walnut) Name=LOC109004651 {ECO:0000313|RefSeq:XP_018838826.1} PE=3	Probable sulfate transporter 3.5 OS=Arabidopsis thaliana (Mouse-ear cress) Name=SULTR35 OrderedLocusNames=At5g19600 ORFNames=T29J13.20 PE=2	Sulfate permease family	[P] KOG0236 Sulfate/bicarbonate/oxalate exchanger SAT-1 and related transporters (SLC26 family)	N/A	IPR030316; Sulfate transporter 3.5
HLJ619_peak_1017	1017	tig00007211	847620	848183	564	*	Cor0116860.1	3.90455	Promoter (<=1kb)	-2.01949	2.00824e-293	down	N/A	N/A	PREDICTED: leucine-rich repeat extensin-like protein 4 [Juglans regia]	leucine-rich repeat extensin-like protein 4 {ECO:0000313|RefSeq:XP_018822828.1} OS=Juglans regia (English walnut) Name=LOC108992672 {ECO:0000313|RefSeq:XP_018822828.1} PE=4	Leucine-rich repeat extensin-like protein 5 Short=AtLRX5 Short=LRR/EXTENSIN5 Cell wall hydroxyproline-rich glycoprotein Precursor OS=Arabidopsis thaliana (Mouse-ear cress) Name=LRX5 OrderedLocusNames=At4g18670 ORFNames=F28A21.80 PE=2	N/A	[M] LSE0601 A Pollen extensin-like protein (Pex)	N/A	N/A
HLJ619_peak_1024	1024	tig00007213	298174	298514	341	*	Cor0179820.1	3.89068	Distal Intergenic	-1.07066	9.40878e-112	down	N/A	GO:0004553//molecular_function hydrolase activity, hydrolyzing O-glycosyl compounds;GO:0005975//biological_process carbohydrate metabolic process	PREDICTED: glucan endo-1,3-beta-glucosidase 14-like [Juglans regia]	glucan endo-1,3-beta-glucosidase 14-like {ECO:0000313|RefSeq:XP_018814284.1} OS=Juglans regia (English walnut) Name=LOC108986203 {ECO:0000313|RefSeq:XP_018814284.1} PE=3	Glucan endo-1,3-beta-glucosidase 14 EC=3.2.1.39 (1->3)-beta-glucan endohydrolase 14 Short=(1->3)-beta-glucanase 14 Beta-1,3-endoglucanase 14 Short=Beta-1,3-glucanase 14 Precursor OS=Arabidopsis thaliana (Mouse-ear cress) OrderedLocusNames=At2g27500 ORFNames=F10A12.18 PE=2	Glycosyl hydrolases family 17	[MVG] LSE0111 A beta-1, 3 glucanase	N/A	IPR000490; Glycoside hydrolase family 17
HLJ619_peak_1029	1029	tig00007215	1785431	1785852	422	*	Cor0101660.1	3.14689	Promoter (1-2kb)	-1.07727	4.57396e-18	down	K00889//1-phosphatidylinositol-4-phosphate 5-kinase [EC:2.7.1.68]	GO:0016307//molecular_function phosphatidylinositol phosphate kinase activity;GO:0046488//biological_process phosphatidylinositol metabolic process	PREDICTED: phosphatidylinositol 4-phosphate 5-kinase 2-like [Juglans regia]	Phosphatidylinositol 4-phosphate 5-kinase {ECO:0000256|PIRNR:PIRNR037274} EC=2.7.1.68 {ECO:0000256|PIRNR:PIRNR037274} OS=Juglans regia (English walnut) Name=LOC108981960 {ECO:0000313|RefSeq:XP_018808771.1} PE=4	Phosphatidylinositol 4-phosphate 5-kinase 1 Short=AtPIP5K1 EC=2.7.1.68 1-phosphatidylinositol 4-phosphate kinase 1 Diphosphoinositide kinase 1 PtdIns(4)P-5-kinase 1 OS=Arabidopsis thaliana (Mouse-ear cress) ORFNames=F2E2.1 PE=1	Phosphatidylinositol-4-phosphate 5-Kinase	[T] KOG0229 Phosphatidylinositol-4-phosphate 5-kinase	N/A	IPR023610; Phosphatidylinositol-4-phosphate 5-kinase
HLJ619_peak_1036	1036	tig00007219	118962	119557	596	*	Cor0147570.1	5.01933	Promoter (<=1kb)	-1.05135	0.0138414	down	N/A	GO:0015074//biological_process DNA integration	hypothetical protein VITISV_018180 [Vitis vinifera]	Uncharacterized protein {ECO:0000313|EMBL:CAN71532.1} OS=Vitis vinifera (Grape) ORFNames=VITISV_018180 {ECO:0000313|EMBL:CAN71532.1} PE=4	N/A	N/A	[R] KOG0017 FOG: Transposon-encoded proteins with TYA, reverse transcriptase, integrase domains in various combinations	N/A	IPR001584; Integrase, catalytic core
HLJ619_peak_1038	1038	tig00007219	559298	559713	416	*	Cor0147760.1	3.34522	Promoter (1-2kb)	-4.49039	1.87142e-143	down	N/A	N/A	PREDICTED: amino acid permease 4-like [Juglans regia]	amino acid permease 4-like {ECO:0000313|RefSeq:XP_018827415.1} OS=Juglans regia (English walnut) Name=LOC108996097 {ECO:0000313|RefSeq:XP_018827415.1} PE=4	Amino acid permease 3 Amino acid transporter AAP3 OS=Arabidopsis thaliana (Mouse-ear cress) Name=AAP3 OrderedLocusNames=At1g77380 ORFNames=F2P24.9 PE=1	Transmembrane amino acid transporter protein	[E] KOG1303 Amino acid transporters	N/A	IPR013057; Amino acid transporter, transmembrane domain
HLJ619_peak_1058	1058	tig00007230	139892	140317	426	*	Cor0150520.1	5.85588	Promoter (2-3kb)	-1.92021	2.2771e-06	down	N/A	GO:0015074//biological_process DNA integration	uncharacterized protein LOC111025033 [Momordica charantia]	Uncharacterized protein {ECO:0000313|EMBL:SPC91119.1} OS=Fagus sylvatica (Beechnut) ORFNames=FSB_LOCUS19001 {ECO:0000313|EMBL:SPC91119.1} PE=4	N/A	N/A	N/A	N/A	IPR001584; Integrase, catalytic core
HLJ619_peak_1062	1062	tig00007232	224124	224581	458	*	Cor0188090.1	4.74008	Distal Intergenic	-1.24783	9.82876e-105	down	N/A	GO:0003700//molecular_function DNA-binding transcription factor activity;GO:0005634//cellular_component nucleus;GO:0006355//biological_process regulation of transcription, DNA-templated;GO:0048364//biological_process root development;GO:0046983//molecular_function protein dimerization activity;GO:0015743//biological_process malate transport	PREDICTED: transcription factor LHW [Juglans regia]	Uncharacterized protein {ECO:0000313|EMBL:SPC95067.1} OS=Fagus sylvatica (Beechnut) ORFNames=FSB_LOCUS22949 {ECO:0000313|EMBL:SPC95067.1} PE=4	Transcription factor LHW BHLH transcription factor delta Short=bHLH delta Basic helix-loop-helix protein 156 Short=AtbHLH156 Short=bHLH 156 Protein LONESOME HIGHWAY bHLH transcription factor bHLH156 OS=Arabidopsis thaliana (Mouse-ear cress) ORFNames=F12K2 PE=1	Aluminium activated malate transporter	[RK] LSE0475 A Predicted bHLH transcription factor	N/A	IPR033260; Transcription factor LHW
HLJ619_peak_1068	1068	tig00007242	1700790	1701163	374	*	Cor0059400.1	4.00872	Intron (Cor0059400.1/Cor0059400, intron 3 of 3)	-3.31644	3.71558e-25	down	K09419//heat shock transcription factor, other eukaryote	GO:0003700//molecular_function DNA-binding transcription factor activity;GO:0005634//cellular_component nucleus;GO:0006355//biological_process regulation of transcription, DNA-templated;GO:0043565//molecular_function sequence-specific DNA binding	PREDICTED: heat stress transcription factor B-4b-like [Juglans regia]	heat stress transcription factor B-4b-like {ECO:0000313|RefSeq:XP_018855724.1} OS=Juglans regia (English walnut) Name=LOC109017997 {ECO:0000313|RefSeq:XP_018855724.1} PE=3	Heat stress transcription factor B-4 Short=AtHsfB4 AtHsf-02 OS=Arabidopsis thaliana (Mouse-ear cress) ORFNames=F2G19.8 PE=2	HSF-type DNA-binding	[K] KOG0627 Heat shock transcription factor	http://plntfdb.bio.uni-potsdam.de/v3.0/fam_mem.php?family_id=HSF	IPR027725; Heat shock transcription factor family
HLJ619_peak_1085	1085	tig00007253	176785	177990	1206	*	Cor0032170.1	4.18277	Exon (Cor0032170.1/Cor0032170, exon 2 of 2)	-4.17817	6.76259e-80	down	K13449//pathogenesis-related protein 1	N/A	pathogenesis-related protein 1-like precursor [Malus domestica] >ABC47922.1 pathogenesis-related protein 1a [Malus domestica]	Pathogenesis-related protein 1a {ECO:0000313|EMBL:ABC47922.1} OS=Malus domestica (Apple) (Pyrus malus) PE=2	Pathogenesis-related protein 1 Short=PR-1 Precursor OS=Arabidopsis thaliana (Mouse-ear cress) OrderedLocusNames=At2g14610 ORFNames=T6B13.15 PE=1	Cysteine-rich secretory protein family	[S] KOG3017 Defense-related protein containing SCP domain	N/A	IPR014044; CAP domain
HLJ619_peak_1087	1087	tig00007253	795724	796081	358	*	Cor0032590.1	3.96516	Intron (Cor0032590.1/Cor0032590, intron 11 of 13)	-1.50544	3.86228e-104	down	N/A	GO:0016021//cellular_component integral component of membrane;GO:0055085//biological_process transmembrane transport	PREDICTED: probable sphingolipid transporter spinster homolog 2 [Juglans regia]	probable sphingolipid transporter spinster homolog 2 {ECO:0000313|RefSeq:XP_018844454.1} OS=Juglans regia (English walnut) Name=LOC109008708 {ECO:0000313|RefSeq:XP_018844454.1} PE=4	Probable sphingolipid transporter spinster homolog 2 OS=Arabidopsis thaliana (Mouse-ear cress) OrderedLocusNames=At5g64500 ORFNames=T12B11.9 PE=2	Major Facilitator Superfamily	[G] KOG1330 Sugar transporter/spinster transmembrane protein	N/A	IPR020846; Major facilitator superfamily domain
HLJ619_peak_1089	1089	tig00007253	1814875	1815334	460	*	Cor0032980.1	3.64458	Promoter (<=1kb)	-2.50937	5.53372e-226	down	K09264//MADS-box transcription factor, plant	GO:0003677//molecular_function DNA binding;GO:0046983//molecular_function protein dimerization activity;GO:0003700//molecular_function DNA-binding transcription factor activity;GO:0005634//cellular_component nucleus;GO:0006355//biological_process regulation of transcription, DNA-templated	MADS-box transcription factor 23-like [Manihot esculenta]	MADS-box transcription factor 23-like isoform X1 {ECO:0000313|RefSeq:XP_018810079.1} OS=Juglans regia (English walnut) Name=LOC108983024 {ECO:0000313|RefSeq:XP_018810079.1} PE=4	Agamous-like MADS-box protein AGL21 OS=Arabidopsis thaliana (Mouse-ear cress) Name=AGL21 OrderedLocusNames=At4g37940 ORFNames=F20D10.60 PE=1	SRF-type transcription factor (DNA-binding and dimerisation domain)	[K] KOG0014 MADS box transcription factor	http://plntfdb.bio.uni-potsdam.de/v3.0/fam_mem.php?family_id=MADS	IPR002487; Transcription factor, K-box
HLJ619_peak_1095	1095	tig00007256	89385	89927	543	*	Cor0158900.1	3.34622	Distal Intergenic	-1.50329	1.99662e-146	down	N/A	GO:0004190//molecular_function aspartic-type endopeptidase activity;GO:0006508//biological_process proteolysis	PREDICTED: aspartic proteinase-like protein 2 [Juglans regia]	aspartic proteinase-like protein 2 {ECO:0000313|RefSeq:XP_018833167.1} OS=Juglans regia (English walnut) Name=LOC109000667 {ECO:0000313|RefSeq:XP_018833167.1} PE=3	Aspartic proteinase-like protein 2 EC=3.4.23.- Precursor OS=Arabidopsis thaliana (Mouse-ear cress) OrderedLocusNames=At1g65240 ORFNames=T23K8.15 PE=3	Xylanase inhibitor C-terminal	[O] KOG1339 Aspartyl protease	N/A	IPR033121; Peptidase family A1 domain
HLJ619_peak_1099	1099	tig00007263	410601	410919	319	*	Cor0045270.1	3.13964	Distal Intergenic	-1.21285	3.98079e-11	down	N/A	N/A	PREDICTED: uncharacterized protein LOC102616627 isoform X1 [Citrus sinensis]	Uncharacterized protein {ECO:0000313|EMBL:KDO60176.1} OS=Citrus sinensis (Sweet orange) (Citrus aurantium var. sinensis) ORFNames=CISIN_1g037790mg {ECO:0000313|EMBL:KDO60176.1} PE=4	N/A	Leucine-zipper of ternary complex factor MIP1	[S] TWOG0168 Uncharacterized protein	N/A	IPR025757; Ternary complex factor MIP1, leucine-zipper
HLJ619_peak_1110	1110	tig00007263	3069265	3069944	680	*	Cor0046080.1	4.8179	Distal Intergenic	-3.36981	0.0216292	down	N/A	N/A	PREDICTED: fasciclin-like arabinogalactan protein 11 [Juglans regia]	Uncharacterized protein {ECO:0000313|EMBL:SPD16150.1} OS=Fagus sylvatica (Beechnut) ORFNames=FSB_LOCUS44032 {ECO:0000313|EMBL:SPD16150.1} PE=4	Fasciclin-like arabinogalactan protein 12 Precursor OS=Arabidopsis thaliana (Mouse-ear cress) Name=FLA12 OrderedLocusNames=At5g60490 ORFNames=MUF9.12 PE=2	Fasciclin domain	[RW] LSE0094 A Arabinogalactan proteins (AGPs)	N/A	IPR000782; FAS1 domain
HLJ619_peak_1116	1116	tig00007265	2124156	2124490	335	*	Cor0086990.1	3.32977	Distal Intergenic	-4.05387	2.62514e-121	down	K14484//auxin-responsive protein IAA	GO:0005515//molecular_function protein binding;GO:0005634//cellular_component nucleus;GO:0006355//biological_process regulation of transcription, DNA-templated	PREDICTED: auxin-responsive protein IAA4-like [Juglans regia] >XP_018810753.1 PREDICTED: auxin-responsive protein IAA4-like [Juglans regia]	Auxin-responsive protein {ECO:0000256|RuleBase:RU004549} OS=Betula platyphylla (Asian white birch) PE=2	Auxin-induced protein 22D Indole-3-acetic acid-induced protein ARG13 OS=Vigna radiata var. radiata (Mung bean) (Phaseolus aureus) Name=AUX22D Synonyms=ARG13 PE=2	AUX/IAA family	[TR] LSE0302 A Auxin-inducible protein	N/A	IPR033389; AUX/IAA domain
HLJ619_peak_1119	1119	tig00007269	268842	269305	464	*	Cor0161540.1	3.34622	Promoter (2-3kb)	-2.07248	0	down	N/A	GO:0016021//cellular_component integral component of membrane;GO:0022857//molecular_function transmembrane transporter activity;GO:0055085//biological_process transmembrane transport	PREDICTED: D-xylose-proton symporter-like 3, chloroplastic [Juglans regia]	D-xylose-proton symporter-like 3, chloroplastic {ECO:0000313|RefSeq:XP_018855510.1} OS=Juglans regia (English walnut) Name=LOC109017772 {ECO:0000313|RefSeq:XP_018855510.1} PE=3	D-xylose-proton symporter-like 3, chloroplastic Precursor OS=Arabidopsis thaliana (Mouse-ear cress) OrderedLocusNames=At5g59250 ORFNames=MNC17.140, MNC17.15 PE=1	Sugar (and other) transporter	[R] KOG0254 Predicted transporter (major facilitator superfamily)	N/A	IPR020846; Major facilitator superfamily domain
HLJ619_peak_1126	1126	tig00007273	1411535	1411905	371	*	Cor0123880.1	4.88716	Distal Intergenic	-1.18989	1.44002e-79	down	N/A	N/A	PREDICTED: protein LIGHT-DEPENDENT SHORT HYPOCOTYLS 5-like [Juglans regia]	protein LIGHT-DEPENDENT SHORT HYPOCOTYLS 5-like {ECO:0000313|RefSeq:XP_018828431.1} OS=Juglans regia (English walnut) Name=LOC108996850 {ECO:0000313|RefSeq:XP_018828431.1} PE=4	Protein LIGHT-DEPENDENT SHORT HYPOCOTYLS 6 Protein ORGAN BOUNDARY 6 OS=Arabidopsis thaliana (Mouse-ear cress) ORFNames=F10K1.20 PE=1	Protein of unknown function (DUF640)	[S] LSE0408 A Uncharacterized protein	N/A	IPR006936; ALOG domain
HLJ619_peak_1131	1131	tig00007282	908609	909079	471	*	Cor0087540.1	3.96516	Exon (Cor0087540.1/Cor0087540, exon 2 of 3)	-1.35945	2.04882e-05	down	N/A	GO:0016491//molecular_function oxidoreductase activity;GO:0050660//molecular_function flavin adenine dinucleotide binding;GO:0055114//biological_process oxidation-reduction process;GO:0016614//molecular_function oxidoreductase activity, acting on CH-OH group of donors	PREDICTED: reticuline oxidase-like protein [Juglans regia] >XP_018806671.1 PREDICTED: reticuline oxidase-like protein [Juglans regia]	reticuline oxidase-like protein {ECO:0000313|RefSeq:XP_018806670.1, ECO:0000313|RefSeq:XP_018806671.1} OS=Juglans regia (English walnut) ECO:0000313|RefSeq:XP_018806671.1} PE=3	Berberine bridge enzyme-like 8 {ECO:0000303|PubMed:26037923} Short=AtBBE-like 8 {ECO:0000303|PubMed:26037923} EC=1.1.1.- {ECO:0000250|UniProtKB:O64743} Precursor OS=Arabidopsis thaliana (Mouse-ear cress) ORFNames=T5I8.15 {ECO:0000312|EMBL:AAD25757.1} PE=2	Berberine and berberine like	[QG] LSE0347 A Predicted berberine bridge enzyme/FAD-binding oxidoreductase	N/A	IPR016166; FAD-binding, type 2
HLJ619_peak_1152	1152	tig00007282	2091176	2091602	427	*	Cor0087940.1	4.07047	Promoter (1-2kb)	-1.6132	2.14694e-26	down	N/A	N/A	PREDICTED: uncharacterized protein LOC109013441 [Juglans regia]	Uncharacterized protein {ECO:0000313|EMBL:SPD33070.1} OS=Fagus sylvatica (Beechnut) ORFNames=FSB_LOCUS60952 {ECO:0000313|EMBL:SPD33070.1} PE=4	N/A	N/A	N/A	N/A	N/A
HLJ619_peak_1159	1159	tig00007285	725511	725989	479	*	Cor0068280.1	3.17871	Promoter (1-2kb)	-2.15432	4.60207e-07	down	K14516//ethylene-responsive transcription factor 1	GO:0003700//molecular_function DNA-binding transcription factor activity;GO:0006355//biological_process regulation of transcription, DNA-templated	ethylene response factor protein 8 [Betula platyphylla]	ERF8 protein {ECO:0000313|EMBL:AJK26928.1} OS=Betula platyphylla (Asian white birch) Name=ERF8 {ECO:0000313|EMBL:AJK26928.1} PE=2	Ethylene-responsive transcription factor 1B Short=AtERF1B Ethylene-responsive element-binding factor 1B Short=EREBP-1B OS=Arabidopsis thaliana (Mouse-ear cress) ORFNames=K14B15.15 PE=1	AP2 domain	[K] LSE0301 A AP2 domain transcription factor	http://plntfdb.bio.uni-potsdam.de/v3.0/fam_mem.php?family_id=AP2-EREBP	IPR001471; AP2/ERF domain
HLJ619_peak_1164	1164	tig00007285	2339295	2339795	501	*	Cor0069880.1	4.4524	Promoter (<=1kb)	-1.55232	1.00426e-84	down	N/A	N/A	PREDICTED: desumoylating isopeptidase 1-like isoform X1 [Juglans regia]	Uncharacterized protein {ECO:0000313|EMBL:SPD27706.1} OS=Fagus sylvatica (Beechnut) ORFNames=FSB_LOCUS55588 {ECO:0000313|EMBL:SPD27706.1} PE=4	N/A	PPPDE putative peptidase domain	[S] KOG0324 Uncharacterized conserved protein	N/A	IPR008580; PPPDE putative peptidase domain
HLJ619_peak_1167	1167	tig00007287	98648	99194	547	*	Cor0162010.1	3.7387	Promoter (<=1kb)	-1.07723	2.9053e-185	down	K12818//ATP-dependent RNA helicase DHX8/PRP22 [EC:3.6.4.13]	GO:0003676//molecular_function nucleic acid binding;GO:0005524//molecular_function ATP binding;GO:0004386//molecular_function helicase activity	PREDICTED: ATP-dependent RNA helicase DEAH11, chloroplastic-like [Juglans regia]	ATP-dependent RNA helicase DEAH11, chloroplastic-like {ECO:0000313|RefSeq:XP_018818034.1} OS=Juglans regia (English walnut) Name=LOC108989044 {ECO:0000313|RefSeq:XP_018818034.1} PE=4	ATP-dependent RNA helicase DEAH11, chloroplastic EC=3.6.4.13 Precursor OS=Arabidopsis thaliana (Mouse-ear cress) ORFNames=F3I3.40 {ECO:0000312|EMBL:CAB45785.1} PE=3	Oligonucleotide/oligosaccharide-binding (OB)-fold	[A] KOG0922 DEAH-box RNA helicase	N/A	IPR014001; Helicase superfamily 1/2, ATP-binding domain
HLJ619_peak_1169	1169	tig00007287	744410	744774	365	*	Cor0162410.1	4.28969	Distal Intergenic	-1.4661	0.00254479	down	N/A	GO:0004672//molecular_function protein kinase activity;GO:0005524//molecular_function ATP binding;GO:0006468//biological_process protein phosphorylation;GO:0005515//molecular_function protein binding	hypothetical protein POPTR_0002s26010g [Populus trichocarpa]	Uncharacterized protein {ECO:0000313|EMBL:SPD06506.1} OS=Fagus sylvatica (Beechnut) ORFNames=FSB_LOCUS34388 {ECO:0000313|EMBL:SPD06506.1} PE=4	MDIS1-interacting receptor like kinase 2 {ECO:0000303|PubMed:26863186} Short=AtMIK2 {ECO:0000303|PubMed:26863186} Probable LRR receptor-like serine/threonine-protein kinase At4g08850 EC=2.7.11.1 {ECO:0000305} Precursor OS=Arabidopsis thaliana (Mouse-ear cress) ORFNames=T32A17.160 {ECO:0000312|EMBL:CAB82121.1} PE=1	Leucine Rich Repeat	[T] LSE0002 A Receptor protein kinase containing LRR repeats	N/A	IPR013210; Leucine-rich repeat-containing N-terminal, plant-type
HLJ619_peak_1177	1177	tig00007297	506670	507027	358	*	Cor0033920.1	3.30109	Intron (Cor0033920.1/Cor0033920, intron 1 of 1)	-2.94589	8.40566e-14	down	N/A	N/A	PREDICTED: protein IDA-LIKE 4 [Vitis vinifera]	Uncharacterized protein {ECO:0000313|EMBL:EMJ07984.1} OS=Prunus persica (Peach) (Amygdalus persica) PRUPE_ppa025503mg {ECO:0000313|EMBL:EMJ07984.1} PE=4	Protein IDA-LIKE 4 Precursor OS=Arabidopsis thaliana (Mouse-ear cress) Name=IDL4 OrderedLocusNames=At3g18715 ORFNames=MVE11 PE=2	N/A	N/A	N/A	N/A
HLJ619_peak_1183	1183	tig00007297	925411	925762	352	*	Cor0033990.1	3.18578	Distal Intergenic	-1.29135	1.38608e-08	down	N/A	GO:0048544//biological_process recognition of pollen;GO:0004672//molecular_function protein kinase activity;GO:0005524//molecular_function ATP binding;GO:0006468//biological_process protein phosphorylation	PREDICTED: G-type lectin S-receptor-like serine/threonine-protein kinase LECRK2 isoform X1 [Juglans regia]	G-type lectin S-receptor-like serine/threonine-protein kinase LECRK2 isoform X1 {ECO:0000313|RefSeq:XP_018827737.1} OS=Juglans regia (English walnut) Name=LOC108996344 {ECO:0000313|RefSeq:XP_018827737.1} PE=4	G-type lectin S-receptor-like serine/threonine-protein kinase LECRK1 {ECO:0000305} Short=OsLecRK1 {ECO:0000303|PubMed:25485617} EC=2.7.11.1 {ECO:0000305} OsRLCK134 {ECO:0000303|PubMed:19825577} Precursor OS=Oryza sativa subsp. japonica (Rice) OSJNBb0005B05.5 {ECO:0000312|EMBL:CAE03338.2} PE=2	Protein tyrosine kinase	[T] LSE0015 A Receptor-like protein kinase, contains lectin domains	N/A	IPR001480; Bulb-type lectin domain
HLJ619_peak_1185	1185	tig00007297	2751135	2751526	392	*	Cor0034160.1	3.23852	Distal Intergenic	-3.00559	5.58316e-08	down	K19040//E3 ubiquitin-protein ligase ATL10/75/76/77/78 [EC:2.3.2.27]	N/A	RING zinc finger protein [Theobroma cacao]	RING zinc finger protein {ECO:0000313|EMBL:EOX92415.1} OS=Theobroma cacao (Cacao) (Cocoa) ORFNames=TCM_001369 {ECO:0000313|EMBL:EOX92415.1} PE=4	E3 ubiquitin-protein ligase ATL76 EC=2.3.2.27 {ECO:0000269|PubMed:15644464} RING-H2 finger protein ATL76 RING-type E3 ubiquitin transferase ATL76 {ECO:0000305} OS=Arabidopsis thaliana (Mouse-ear cress) Name=ATL76 OrderedLocusNames=At1g49210 ORFNames=F27J15.3 PE=1	Ring finger domain	[O] KOG0800 FOG: Predicted E3 ubiquitin ligase	N/A	IPR001841; Zinc finger, RING-type
HLJ619_peak_1187	1187	tig00007297	3548727	3549272	546	*	Cor0034460.1	4.09549	Intron (Cor0034460.1/Cor0034460, intron 5 of 12)	-1.14325	7.81902e-82	down	N/A	N/A	transcriptional corepressor SEUSS-like [Herrania umbratica]	SEUSS transcriptional co-regulator isoform 1 {ECO:0000313|EMBL:EOX92539.1} OS=Theobroma cacao (Cacao) (Cocoa) ORFNames=TCM_001475 {ECO:0000313|EMBL:EOX92539.1} PE=4	Transcriptional corepressor SEUSS Short=AtSEU OS=Arabidopsis thaliana (Mouse-ear cress) Name=SEU OrderedLocusNames=At1g43850 ORFNames=F28H19.10 PE=1	LIM-domain binding protein	[X] TWOG0969 Unnamed protein	N/A	IPR029005; LIM-domain binding protein/SEUSS
HLJ619_peak_1214	1214	tig00007302	1679307	1680302	996	*	Cor0118340.1	4.74008	Intron (Cor0118350.1/Cor0118350, intron 4 of 11)	-1.94421	0	down	K11699//RNA-dependent RNA polymerase [EC:2.7.7.48]	GO:0003968//molecular_function RNA-directed 5'-3' RNA polymerase activity	PREDICTED: RNA-dependent RNA polymerase 1 [Juglans regia] >XP_018856655.1 PREDICTED: RNA-dependent RNA polymerase 1 [Juglans regia] >XP_018856657.1 PREDICTED: RNA-dependent RNA polymerase 1 [Juglans regia]	RNA-dependent RNA polymerase {ECO:0000256|RuleBase:RU363098} EC=2.7.7.48 {ECO:0000256|RuleBase:RU363098} OS=Juglans regia (English walnut) ECO:0000313|RefSeq:XP_018856655.1, ECO:0000313|RefSeq:XP_018856657.1} PE=3	RNA-dependent RNA polymerase 1 Short=AtRDRP1 EC=2.7.7.48 RNA-directed RNA polymerase 1 OS=Arabidopsis thaliana (Mouse-ear cress) ORFNames=F10B6.19 PE=2	RNA dependent RNA polymerase	[A] KOG0988 RNA-directed RNA polymerase QDE-1 required for posttranscriptional gene silencing and RNA interference	N/A	IPR007855; RNA-dependent RNA polymerase, eukaryotic-type
HLJ619_peak_1220	1220	tig00007306	491318	491821	504	*	Cor0151050.1	3.34622	Distal Intergenic	-1.29513	7.58182e-06	down	N/A	N/A	PREDICTED: cyclin-J18 isoform X1 [Juglans regia]	cyclin-J18 isoform X1 {ECO:0000313|RefSeq:XP_018831097.1} OS=Juglans regia (English walnut) Name=LOC108998837 {ECO:0000313|RefSeq:XP_018831097.1} PE=4	Cyclin-J18 OS=Arabidopsis thaliana (Mouse-ear cress) Name=CYCJ18 OrderedLocusNames=At2g01905 ORFNames=T23K3 PE=2	Cyclin, N-terminal domain	N/A	N/A	IPR006671; Cyclin, N-terminal
HLJ619_peak_1230	1230	tig00007313	465054	465396	343	*	Cor0178020.1	4.98654	Promoter (2-3kb)	-1.65342	3.09066e-118	down	N/A	N/A	PREDICTED: uncharacterized protein LOC109008220 [Juglans regia]	uncharacterized protein LOC109008220 {ECO:0000313|RefSeq:XP_018843776.1} OS=Juglans regia (English walnut) Name=LOC109008220 {ECO:0000313|RefSeq:XP_018843776.1} PE=4	N/A	N/A	[X] LSE1437 A Unnamed protein	N/A	N/A
HLJ619_peak_1233	1233	tig00007317	96685	97447	763	*	Cor0138630.1	3.57474	Promoter (2-3kb)	-1.02416	7.62754e-31	down	N/A	GO:0005216//molecular_function ion channel activity;GO:0006811//biological_process ion transport;GO:0016020//cellular_component membrane;GO:0055085//biological_process transmembrane transport;GO:0005515//molecular_function protein binding	PREDICTED: potassium channel AKT1-like isoform X1 [Juglans regia]	Uncharacterized protein {ECO:0000313|EMBL:SPD27105.1} OS=Fagus sylvatica (Beechnut) ORFNames=FSB_LOCUS54987 {ECO:0000313|EMBL:SPD27105.1} PE=4	Potassium channel AKT6 Potassium channel SPIK Shaker pollen inward rectifier K(+) channel OS=Arabidopsis thaliana (Mouse-ear cress) ORFNames=F3N11.5 PE=1	Cyclic nucleotide-binding domain	[PT] KOG0498 K+-channel ERG and related proteins, contain PAS/PAC sensor domain	N/A	IPR021789; KHA domain
HLJ619_peak_1236	1236	tig00007321	367679	368429	751	*	Cor0094840.1	4.55609	Distal Intergenic	-3.01338	0.0353258	down	N/A	N/A	hypothetical protein MANES_03G004000 [Manihot esculenta]	Uncharacterized protein {ECO:0000313|EMBL:OAY53535.1} OS=Manihot esculenta (Cassava) (Jatropha manihot) ORFNames=MANES_03G004000 {ECO:0000313|EMBL:OAY53535.1} PE=4	N/A	Cotton fibre expressed protein	[X] LSE1235 A Unnamed protein	N/A	IPR008480; Protein of unknown function DUF761, plant
HLJ619_peak_1244	1244	tig00007321	1758455	1758969	515	*	Cor0095470.1	3.91842	Distal Intergenic	-7.85492	9.54747e-09	down	N/A	N/A	hypothetical protein PRUPE_8G208500 [Prunus persica]	Uncharacterized protein {ECO:0000313|EMBL:EMJ01991.1} OS=Prunus persica (Peach) (Amygdalus persica) ORFNames=PRUPE_ppa024473mg {ECO:0000313|EMBL:EMJ01991.1} PE=4	S-protein homolog 5 {ECO:0000303|PubMed:10344198} Precursor OS=Arabidopsis thaliana (Mouse-ear cress) ORFNames=T1G11.10 {ECO:0000312|EMBL:AAB80626.1} PE=2	Plant self-incompatibility protein S1	N/A	N/A	IPR010264; Plant self-incompatibility S1
HLJ619_peak_1247	1247	tig00007323	129079	129426	348	*	Cor0113570.1	4.74592	Distal Intergenic	-1.96975	1.66363e-195	down	N/A	N/A	hypothetical protein POPTR_006G243700v3 [Populus trichocarpa]	Uncharacterized protein {ECO:0000313|EMBL:SPD06094.1} OS=Fagus sylvatica (Beechnut) ORFNames=FSB_LOCUS33976 {ECO:0000313|EMBL:SPD06094.1} PE=4	BURP domain protein RD22 {ECO:0000303|PubMed:9790599} Dehydration-responsive protein RD22 {ECO:0000303|PubMed:8479424} Precursor OS=Arabidopsis thaliana (Mouse-ear cress) ORFNames=T14C9.150 {ECO:0000312|EMBL:AC006601} PE=2	BURP domain	[X] LSE1306 A Unnamed protein	N/A	IPR004873; BURP domain
HLJ619_peak_1278	1278	tig00007343	664538	665151	614	*	Cor0104710.1	3.18578	Distal Intergenic	-1.84816	3.49809e-55	down	N/A	GO:0046983//molecular_function protein dimerization activity	PREDICTED: transcription factor bHLH62-like [Juglans regia]	Uncharacterized protein {ECO:0000313|EMBL:SPC75599.1} OS=Fagus sylvatica (Beechnut) ORFNames=FSB_LOCUS3481 {ECO:0000313|EMBL:SPC75599.1} PE=4	Transcription factor bHLH62 Basic helix-loop-helix protein 62 Short=AtbHLH62 Short=bHLH 62 Transcription factor EN 85 bHLH transcription factor bHLH062 OS=Arabidopsis thaliana (Mouse-ear cress) ORFNames=F21O3.5 PE=2	Helix-loop-helix DNA-binding domain	[KT] LSE0107 A bHLH transcription factor	http://plntfdb.bio.uni-potsdam.de/v3.0/fam_mem.php?family_id=bHLH	IPR011598; Myc-type, basic helix-loop-helix (bHLH) domain
HLJ619_peak_1279	1279	tig00007343	1148448	1148788	341	*	Cor0104990.1	4.18277	Promoter (2-3kb)	-1.08035	1.09551e-61	down	N/A	GO:0016491//molecular_function oxidoreductase activity;GO:0055114//biological_process oxidation-reduction process	PREDICTED: putative quinone-oxidoreductase homolog, chloroplastic [Juglans regia]	putative quinone-oxidoreductase homolog, chloroplastic {ECO:0000313|RefSeq:XP_018844199.1} OS=Juglans regia (English walnut) Name=LOC109008534 {ECO:0000313|RefSeq:XP_018844199.1} PE=4	Chloroplast envelope quinone oxidoreductase homolog {ECO:0000303|PubMed:20424175} Short=ceQORH {ECO:0000303|PubMed:20424175} EC=1.3.1.- {ECO:0000269|PubMed:26678323} OS=Arabidopsis thaliana (Mouse-ear cress) ORFNames=F25G13_100 {ECO:0000312|EMBL:CAB45500.1} PE=1	Alcohol dehydrogenase GroES-like domain	[CR] KOG1198 Zinc-binding oxidoreductase	N/A	IPR020843; Polyketide synthase, enoylreductase domain
HLJ619_peak_1281	1281	tig00007346	112854	113309	456	*	Cor0158480.1	3.21193	Intron (Cor0158490.1/Cor0158490, intron 7 of 7)	-2.60355	3.80826e-12	down	K05387//glutamate receptor, ionotropic, plant	N/A	PREDICTED: glutamate receptor 2.9-like [Juglans regia]	Glutamate receptor {ECO:0000256|PIRNR:PIRNR037090} OS=Juglans regia (English walnut) Name=LOC109000929 {ECO:0000313|RefSeq:XP_018833539.1} PE=3	Glutamate receptor 2.3 Ligand-gated ion channel 2.3 Precursor OS=Arabidopsis thaliana (Mouse-ear cress) Name=GLR2.3 OrderedLocusNames=At2g24710 ORFNames=F27A10.2 PE=2	Receptor family ligand binding region	[PET] KOG1052 Glutamate-gated kainate-type ion channel receptor subunit GluR5 and related subunits	N/A	IPR001828; Receptor, ligand binding region
HLJ619_peak_1282	1282	tig00007346	641088	641495	408	*	Cor0158670.1	3.25292	Promoter (2-3kb)	-1.99114	4.35256e-45	down	N/A	GO:0016788//molecular_function hydrolase activity, acting on ester bonds	PREDICTED: GDSL esterase/lipase At5g45950 [Juglans regia]	GDSL esterase/lipase At5g45950 {ECO:0000313|RefSeq:XP_018838492.1} OS=Juglans regia (English walnut) Name=LOC109004410 {ECO:0000313|RefSeq:XP_018838492.1} PE=3	GDSL esterase/lipase At5g45950 EC=3.1.1.- Extracellular lipase At5g45950 Precursor OS=Arabidopsis thaliana (Mouse-ear cress) OrderedLocusNames=At5g45950 ORFNames=K15I22.15 PE=2	GDSL-like Lipase/Acylhydrolase	[RI] LSE0388 A Predicted lipase	N/A	IPR001087; GDSL lipase/esterase
HLJ619_peak_1295	1295	tig00007354	72459	72949	491	*	Cor0078230.1	4.18277	Promoter (<=1kb)	-3.91529	7.95525e-11	down	N/A	GO:0004672//molecular_function protein kinase activity;GO:0006468//biological_process protein phosphorylation;GO:0004674//molecular_function protein serine/threonine kinase activity;GO:0005524//molecular_function ATP binding;GO:0048544//biological_process recognition of pollen	PREDICTED: G-type lectin S-receptor-like serine/threonine-protein kinase At1g11410 isoform X1 [Juglans regia]	Uncharacterized protein {ECO:0000313|EMBL:SPC77286.1} OS=Fagus sylvatica (Beechnut) ORFNames=FSB_LOCUS5168 {ECO:0000313|EMBL:SPC77286.1} PE=4	G-type lectin S-receptor-like serine/threonine-protein kinase RKS1 EC=2.7.11.1 Receptor-like protein kinase 1 Precursor OS=Arabidopsis thaliana (Mouse-ear cress) Name=RKS1 OrderedLocusNames=At1g11340 ORFNames=T23J18.1, T28P6.1 PE=3	PAN-like domain	[T] LSE0015 A Receptor-like protein kinase, contains lectin domains	N/A	IPR021820; S-locus receptor kinase, C-terminal
HLJ619_peak_1301	1301	tig00007354	2477683	2478051	369	*	Cor0079670.1	3.98223	Distal Intergenic	-1.31935	9.63994e-68	down	N/A	GO:0005515//molecular_function protein binding	PREDICTED: ankyrin repeat domain-containing protein 13C-like [Juglans regia] >XP_018860673.1 PREDICTED: ankyrin repeat domain-containing protein 13C-like [Juglans regia]	ankyrin repeat domain-containing protein 13C-like {ECO:0000313|RefSeq:XP_018841931.1, ECO:0000313|RefSeq:XP_018860673.1} OS=Juglans regia (English walnut) Synonyms=LOC109006939 {ECO:0000313|RefSeq:XP_018841931.1} PE=4	N/A	GPCR-chaperone	[R] KOG0522 Ankyrin repeat protein	N/A	IPR021832; Ankyrin repeat domain-containing protein 13
HLJ619_peak_1304	1304	tig00007356	565004	565502	499	*	Cor0160980.1	3.34622	Promoter (1-2kb)	-4.49439	7.5642e-24	down	N/A	GO:0005515//molecular_function protein binding	hypothetical protein CUMW_273200 [Citrus unshiu]	Uncharacterized protein {ECO:0000313|EMBL:SPC77137.1} OS=Fagus sylvatica (Beechnut) ORFNames=FSB_LOCUS5019 {ECO:0000313|EMBL:SPC77137.1} PE=4	N/A	Ankyrin repeats (3 copies)	N/A	N/A	IPR020683; Ankyrin repeat-containing domain
HLJ619_peak_1305	1305	tig00007358	134760	135202	443	*	Cor0195340.1	3.82645	Distal Intergenic	-1.89318	2.64897e-220	down	K14445//solute carrier family 13 (sodium-dependent dicarboxylate transporter), member 2/3/5	GO:0005215//molecular_function transporter activity;GO:0006814//biological_process sodium ion transport;GO:0016020//cellular_component membrane;GO:0055085//biological_process transmembrane transport	PREDICTED: tonoplast dicarboxylate transporter-like [Juglans regia]	tonoplast dicarboxylate transporter-like {ECO:0000313|RefSeq:XP_018805481.1} OS=Juglans regia (English walnut) Name=LOC108979279 {ECO:0000313|RefSeq:XP_018805481.1} PE=4	Tonoplast dicarboxylate transporter Short=AttDT Sodium-dicarboxylate cotransporter-like Short=AtSDAT Vacuolar malate transporter OS=Arabidopsis thaliana (Mouse-ear cress) ORFNames=MNJ7.15 PE=2	Sodium:sulfate symporter transmembrane region	[P] KOG1281 Na+/dicarboxylate, Na+/tricarboxylate and phosphate transporters	N/A	IPR001898; Solute carrier family 13
HLJ619_peak_1306	1306	tig00007360	86995	87452	458	*	Cor0183840.1	3.34622	Distal Intergenic	-3.48517	0	down	N/A	N/A	protein PYRICULARIA ORYZAE RESISTANCE 21-like isoform X2 [Cucurbita maxima]	Uncharacterized protein {ECO:0000313|EMBL:ONI09719.1} OS=Prunus persica (Peach) (Amygdalus persica) ORFNames=PRUPE_4G005100 {ECO:0000313|EMBL:ONI09719.1} PE=4	N/A	N/A	[X] LSE2082 A Unnamed protein	N/A	N/A
HLJ619_peak_1307	1307	tig00007360	335705	336215	511	*	Cor0184080.1	3.52324	Promoter (1-2kb)	-1.24819	5.10513e-08	down	K00787//farnesyl diphosphate synthase [EC:2.5.1.1 2.5.1.10]	GO:0008299//biological_process isoprenoid biosynthetic process	PREDICTED: farnesyl pyrophosphate synthase 1-like [Juglans regia]	Uncharacterized protein {ECO:0000313|EMBL:SPC79029.1} OS=Fagus sylvatica (Beechnut) ORFNames=FSB_LOCUS6911 {ECO:0000313|EMBL:SPC79029.1} PE=3	Farnesyl pyrophosphate synthase 1 Short=FPP synthase 1 Short=FPS 1 EC=2.5.1.10 (2E,6E)-farnesyl diphosphate synthase 1 Dimethylallyltranstransferase 1 EC=2.5.1.1 Farnesyl diphosphate synthase 1 Geranyltranstransferase 1 OS=Lupinus albus (White lupine) (Lupinus termis) Name=FPS1 PE=2	Polyprenyl synthetase	[H] KOG0711 Polyprenyl synthetase	N/A	IPR000092; Polyprenyl synthetase
HLJ619_peak_1308	1308	tig00007360	492439	492844	406	*	Cor0184340.1	3.62777	Exon (Cor0184330.1/Cor0184330, exon 6 of 6)	-1.03905	3.17033e-64	down	N/A	N/A	PREDICTED: myb family transcription factor PHL7-like isoform X1 [Juglans regia] >XP_018805340.1 PREDICTED: myb family transcription factor PHL7-like isoform X1 [Juglans regia] >XP_018805341.1 PREDICTED: myb family transcription factor PHL7-like isoform X1 [Juglans regia] >XP_018805342.1 PREDICTED: myb family transcription factor PHL7-like isoform X1 [Juglans regia] >XP_018805343.1 PREDICTED: myb …	myb family transcription factor PHL7-like isoform X1 {ECO:0000313|RefSeq:XP_018805339.1, ECO:0000313|RefSeq:XP_018805340.1, ECO:0000313|RefSeq:XP_018805341.1} OS=Juglans regia (English walnut) ECO:0000313|RefSeq:XP_018805346.1} PE=4	Myb family transcription factor PHL7 {ECO:0000305} Protein PHR1-LIKE 7 {ECO:0000305} OS=Arabidopsis thaliana (Mouse-ear cress) ORFNames=F23H14.3 {ECO:0000312|EMBL:AAF18654.1} PE=2	Myb-like DNA-binding domain	[RK] LSE0452 A MYB transcription factor	http://plntfdb.bio.uni-potsdam.de/v3.0/fam_mem.php?family_id=G2-like	IPR025756; MYB-CC type transcription factor, LHEQLE-containing domain
HLJ619_peak_1315	1315	tig00007370	1338011	1338440	430	*	Cor0025520.1	3.19694	Distal Intergenic	-1.41457	7.91832e-16	down	N/A	N/A	PREDICTED: uncharacterized protein LOC109011297 [Juglans regia]	uncharacterized protein LOC109011297 {ECO:0000313|RefSeq:XP_018847983.1} OS=Juglans regia (English walnut) Name=LOC109011297 {ECO:0000313|RefSeq:XP_018847983.1} PE=4	N/A	Protein of unknown function (DUF1685)	N/A	N/A	IPR012881; Protein of unknown function DUF1685
HLJ619_peak_1320	1320	tig00007370	1922458	1922891	434	*	Cor0025640.1	4.0933	Intron (Cor0025650.1/Cor0025650, intron 5 of 8)	-3.72591	3.30458e-23	down	N/A	N/A	N/A	Uncharacterized protein {ECO:0000313|EMBL:PPD74826.1} OS=Gossypium barbadense (Sea-island cotton) (Egyptian cotton) ORFNames=GOBAR_DD28257 {ECO:0000313|EMBL:PPD74826.1} PE=4	N/A	N/A	N/A	N/A	N/A
HLJ619_peak_1322	1322	tig00007370	2201807	2202652	846	*	Cor0025760.1	6.96784	Distal Intergenic	-2.64676	4.07476e-13	down	N/A	N/A	PREDICTED: RING-H2 finger protein ATL74-like [Malus domestica] >XP_017180655.1 PREDICTED: RING-H2 finger protein ATL74-like [Malus domestica]	Uncharacterized protein {ECO:0000313|EMBL:SPD05701.1} OS=Fagus sylvatica (Beechnut) ORFNames=FSB_LOCUS33583 {ECO:0000313|EMBL:SPD05701.1} PE=4	E3 ubiquitin-protein ligase ATL76 EC=2.3.2.27 {ECO:0000269|PubMed:15644464} RING-H2 finger protein ATL76 RING-type E3 ubiquitin transferase ATL76 {ECO:0000305} OS=Arabidopsis thaliana (Mouse-ear cress) Name=ATL76 OrderedLocusNames=At1g49210 ORFNames=F27J15.3 PE=1	Ring finger domain	[O] KOG0800 FOG: Predicted E3 ubiquitin ligase	N/A	IPR001841; Zinc finger, RING-type
HLJ619_peak_1335	1335	tig00007400	238531	238918	388	*	Cor0152510.1	4.73858	Promoter (2-3kb)	-1.69169	9.5456e-46	down	N/A	GO:0004842//molecular_function ubiquitin-protein transferase activity;GO:0016567//biological_process protein ubiquitination	PREDICTED: U-box domain-containing protein 26-like [Juglans regia]	RING-type E3 ubiquitin transferase {ECO:0000256|SAAS:SAAS00702733} EC=2.3.2.27 {ECO:0000256|SAAS:SAAS00702733} OS=Juglans regia (English walnut) Name=LOC108988933 {ECO:0000313|RefSeq:XP_018817894.1} PE=4	U-box domain-containing protein 25 EC=2.3.2.27 Plant U-box protein 25 RING-type E3 ubiquitin transferase PUB25 {ECO:0000305} OS=Arabidopsis thaliana (Mouse-ear cress) Name=PUB25 OrderedLocusNames=At3g19380 ORFNames=MLD14.11 PE=2	U-box domain	[R] LSE0497 A U-box protein	N/A	IPR003613; U box domain
HLJ619_peak_1337	1337	tig00007401	83908	84256	349	*	Cor0216360.1	4.8179	Distal Intergenic	-1.41773	4.44618e-227	down	N/A	GO:0004672//molecular_function protein kinase activity;GO:0005524//molecular_function ATP binding;GO:0006468//biological_process protein phosphorylation	leucine-rich repeat receptor-like serine/threonine-protein kinase BAM3 [Prunus persica]	Uncharacterized protein {ECO:0000313|EMBL:ONI36284.1} OS=Prunus persica (Peach) (Amygdalus persica) ORFNames=PRUPE_1G579200 {ECO:0000313|EMBL:ONI36284.1} PE=3	Leucine-rich repeat receptor-like serine/threonine-protein kinase BAM2 EC=2.7.11.1 Protein BARELY ANY MERISTEM 2 Precursor OS=Arabidopsis thaliana (Mouse-ear cress) Name=BAM2 OrderedLocusNames=At3g49670 ORFNames=T16K5.20 PE=1	Protein kinase domain	[T] LSE0002 A Receptor protein kinase containing LRR repeats	N/A	IPR000719; Protein kinase domain
HLJ619_peak_1357	1357	tig00007418	751722	752044	323	*	Cor0088780.1	3.28253	Distal Intergenic	-3.05843	0.000954065	down	N/A	N/A	PREDICTED: UPF0481 protein At3g47200-like [Juglans regia]	UPF0481 protein At3g47200-like {ECO:0000313|RefSeq:XP_018839494.1} OS=Juglans regia (English walnut) Name=LOC109005147 {ECO:0000313|RefSeq:XP_018839494.1} PE=4	N/A	Plant protein of unknown function	[S] LSE0031 A Uncharacterized protein	N/A	IPR004158; Protein of unknown function DUF247, plant

## Sheet: Ov3.1
							Table S4 ChARF3 regulated target genes at three ovule development stages
peak_name	原排序	seqnames	start	end	width	strand	Gene ID	fold_enrichment	annotation	log2(Ov2/Ov1)	padj	regulated	kegg	go	nr	trembl	swissprot	pfam	kog	tf	IPR
HLJ728_peak_16	16	tig00001017	218809	219214	406	*	Cor0194870.1	4.53608	Downstream (2-3kb)	-1.13295	7.02343e-35	down	N/A	N/A	PREDICTED: fasciclin-like arabinogalactan protein 14 [Juglans regia]	fasciclin-like arabinogalactan protein 14 {ECO:0000313|RefSeq:XP_018845667.1} OS=Juglans regia (English walnut) Name=LOC109009587 {ECO:0000313|RefSeq:XP_018845667.1} PE=4	Fasciclin-like arabinogalactan protein 14 Precursor OS=Arabidopsis thaliana (Mouse-ear cress) Name=FLA14 OrderedLocusNames=At3g12660 ORFNames=MBK21.3, T2E22.3 PE=2	Fasciclin domain	[RW] LSE0094 A Arabinogalactan proteins (AGPs)	N/A	IPR033254; Fasciclin-like arabinogalactan protein
HLJ728_peak_23	23	tig00001529	109281	109665	385	*	Cor0194020.1	3.39382	Promoter (<=1kb)	-2.34962	1.01875e-11	down	N/A	GO:0004553//molecular_function hydrolase activity, hydrolyzing O-glycosyl compounds;GO:0005975//biological_process carbohydrate metabolic process	PREDICTED: endoglucanase 12 isoform X1 [Juglans regia] >XP_018842257.1 PREDICTED: endoglucanase 12 isoform X5 [Juglans regia]	Endoglucanase {ECO:0000256|RuleBase:RU361166} EC=3.2.1.4 {ECO:0000256|RuleBase:RU361166} OS=Juglans regia (English walnut) ECO:0000313|RefSeq:XP_018842257.1} PE=3	Endoglucanase 12 EC=3.2.1.4 Endo-1,4-beta glucanase 12 OsGLU3 OS=Oryza sativa subsp. japonica (Rice) ORFNames=OSJNBa0067K08.14 PE=2	Glycosyl hydrolase family 9	[G] LSE0350 A Glycosyl hydrolase (endo-1, 4-beta-glucanase)	N/A	IPR001701; Glycoside hydrolase family 9
HLJ728_peak_45	45	tig00002074	154576	154899	324	*	Cor0214800.1	3.45412	Intron (Cor0214810.1/Cor0214810, intron 1 of 1)	-1.52704	2.36715e-34	down	K03654//ATP-dependent DNA helicase RecQ [EC:3.6.4.12]	N/A	PREDICTED: uncharacterized protein LOC108989185 isoform X1 [Juglans regia]	ATP-dependent DNA helicase {ECO:0000256|RuleBase:RU364117} EC=3.6.4.12 {ECO:0000256|RuleBase:RU364117} OS=Juglans regia (English walnut) Name=LOC108989185 {ECO:0000313|RefSeq:XP_018818260.1} PE=3	N/A	N/A	N/A	N/A	N/A
HLJ728_peak_47	47	tig00002110	249213	249635	423	*	Cor0180630.1	3.47922	Distal Intergenic	-1.29932	1.59301e-116	down	K14505//cyclin D3, plant	GO:0005634//cellular_component nucleus	PREDICTED: cyclin-D3-1-like [Juglans regia]	Uncharacterized protein {ECO:0000313|EMBL:SPC78268.1} OS=Fagus sylvatica (Beechnut) ORFNames=FSB_LOCUS6150 {ECO:0000313|EMBL:SPC78268.1} PE=3	Cyclin-D3-3 G1/S-specific cyclin-D3-3 Short=CycD3 OS=Arabidopsis thaliana (Mouse-ear cress) Name=CYCD3-3 OrderedLocusNames=At3g50070 ORFNames=F3A4.150 PE=2	Cyclin, C-terminal domain	[D] KOG0656 G1/S-specific cyclin D	N/A	IPR013763; Cyclin-like
HLJ728_peak_53	53	tig00002363	469075	469390	316	*	Cor0186670.1	4.15238	Promoter (<=1kb)	-1.97368	1.23515e-120	down	K17275//plastin-1	GO:0005515//molecular_function protein binding	PREDICTED: fimbrin-2 [Juglans regia]	fimbrin-2 {ECO:0000313|RefSeq:XP_018817945.1} OS=Juglans regia (English walnut) Name=LOC108988970 {ECO:0000313|RefSeq:XP_018817945.1} PE=4	Fimbrin-2 {ECO:0000305} Short=AtFIM2 Fimbrin2 {ECO:0000305} OS=Arabidopsis thaliana (Mouse-ear cress) ORFNames=MJE7.9 {ECO:0000312|EMBL:BAA96966.1} PE=2	Calponin homology (CH) domain	[Z] KOG0046 Ca2+-binding actin-bundling protein (fimbrin/plastin), EF-Hand protein superfamily	N/A	IPR001715; Calponin homology domain
HLJ728_peak_58	57	tig00006868	172970	173339	370	*	Cor0126310.1	3.44791	Distal Intergenic	-1.27187	0.000166714	down	N/A	GO:0003677//molecular_function DNA binding;GO:0006355//biological_process regulation of transcription, DNA-templated	LEAFY [Betula platyphylla]	LEAFY {ECO:0000313|EMBL:AKN56864.1} OS=Betula platyphylla (Asian white birch) Name=LEAFY {ECO:0000313|EMBL:AKN56864.1} PE=2	Floricaula/leafy homolog PTLF OS=Populus trichocarpa (Western balsam poplar) (Populus balsamifera subsp. trichocarpa) Name=FL ORFNames=POPTR_0015s11820g PE=2	Floricaula / Leafy protein SAM domain	N/A	http://plntfdb.bio.uni-potsdam.de/v3.0/fam_mem.php?family_id=LFY	IPR035209; Floricaula/leafy, DNA-binding C-terminal domain
HLJ728_peak_75	74	tig00006874	643315	644258	944	*	Cor0133890.1	4.37286	Downstream (1-2kb)	-1.05255	1.83311e-17	down	N/A	N/A	PREDICTED: uncharacterized protein LOC109003860 isoform X2 [Juglans regia]	uncharacterized protein LOC109003860 isoform X2 {ECO:0000313|RefSeq:XP_018837725.1} OS=Juglans regia (English walnut) Name=LOC109003860 {ECO:0000313|RefSeq:XP_018837725.1} PE=4	N/A	Neprosin activation peptide	[OR] LSE0110 A Predicted carboxyl-terminal proteinase, contains an unknown domain	N/A	IPR025521; Neprosin activation peptide
HLJ728_peak_118	117	tig00006894	204984	205368	385	*	Cor0114140.1	3.39996	Downstream (1-2kb)	-2.38644	1.18139e-260	down	K09273//upstream-binding transcription factor	N/A	PREDICTED: high mobility group B protein 6-like [Juglans regia]	high mobility group B protein 6-like {ECO:0000313|RefSeq:XP_018815534.1} OS=Juglans regia (English walnut) Name=LOC108987126 {ECO:0000313|RefSeq:XP_018815534.1} PE=4	High mobility group B protein 6 Nucleosome/chromatin assembly factor group D 06 Short=Nucleosome/chromatin assembly factor group D 6 WRKY transcription factor 53 Short=AtWRKY53 Short=WRKY DNA-binding protein 53 OS=Arabidopsis thaliana (Mouse-ear cress) ORFNames=F9D16.270, T32A16.2 PE=2	HMG (high mobility group) box	[R] KOG0381 HMG box-containing protein	N/A	IPR009071; High mobility group box domain
HLJ728_peak_156	155	tig00006931	148265	148978	714	*	Cor0134840.1	3.35748	Promoter (1-2kb)	-1.11344	6.03179e-21	down	K10406//kinesin family member C2/C3	GO:0005515//molecular_function protein binding;GO:0003777//molecular_function microtubule motor activity;GO:0005524//molecular_function ATP binding;GO:0007018//biological_process microtubule-based movement;GO:0008017//molecular_function microtubule binding	PREDICTED: kinesin-4-like isoform X1 [Juglans regia]	kinesin-4-like isoform X1 {ECO:0000313|RefSeq:XP_018824775.1} OS=Juglans regia (English walnut) Name=LOC108994136 {ECO:0000313|RefSeq:XP_018824775.1} PE=3	Kinesin-like protein KIN-14I {ECO:0000305} OS=Arabidopsis thaliana (Mouse-ear cress) ORFNames=T30B22.20 {ECO:0000312|EMBL:AAC62860.1} PE=2	Kinesin motor domain	[Z] KOG0239 Kinesin (KAR3 subfamily)	N/A	IPR027640; Kinesin-like protein
HLJ728_peak_168	167	tig00006935	822305	822635	331	*	Cor0160030.1	3.62887	Promoter (2-3kb)	-1.71048	1.44169e-92	down	N/A	GO:0006629//biological_process lipid metabolic process	probable inactive patatin-like protein 9 [Carica papaya]	Patatin {ECO:0000256|RuleBase:RU361262} EC=3.1.1.- {ECO:0000256|RuleBase:RU361262} OS=Juglans regia (English walnut) Name=LOC108988684 {ECO:0000313|RefSeq:XP_018817554.1} PE=3	Probable inactive patatin-like protein 9 Short=AtPLP9 Patatin-related phospholipase A IIIdelta Short=pPLAIIId Phospholipase A IIIB Short=AtPLAIIIB OS=Arabidopsis thaliana (Mouse-ear cress) Name=PLP9 OrderedLocusNames=At3g63200 ORFNames=F16M2.50 PE=2	Patatin-like phospholipase	[I] KOG0513 Ca2+-independent phospholipase A2	N/A	IPR002641; Patatin-like phospholipase domain
HLJ728_peak_174	173	tig00006938	221747	222157	411	*	Cor0206800.1	6.04109	Distal Intergenic	-1.1816	1.00768e-36	down	K01188//beta-glucosidase [EC:3.2.1.21]	GO:0004553//molecular_function hydrolase activity, hydrolyzing O-glycosyl compounds;GO:0005975//biological_process carbohydrate metabolic process	PREDICTED: beta-glucosidase 42 isoform X1 [Juglans regia]	Beta-glucosidase {ECO:0000256|RuleBase:RU361175} EC=3.2.1.21 {ECO:0000256|RuleBase:RU361175} OS=Juglans regia (English walnut) Name=LOC109000454 {ECO:0000313|RefSeq:XP_018832863.1} PE=3	Beta-glucosidase 42 {ECO:0000303|PubMed:15604686} Short=AtBGLU42 {ECO:0000303|PubMed:15604686} EC=3.2.1.21 {ECO:0000250|UniProtKB:Q8L7J2} OS=Arabidopsis thaliana (Mouse-ear cress) ORFNames=MLF18.1 {ECO:0000312|EMBL:BAB11630.1} PE=2	Glycosyl hydrolase family 1	[G] KOG0626 Beta-glucosidase, lactase phlorizinhydrolase, and related proteins	N/A	IPR001360; Glycoside hydrolase family 1
HLJ728_peak_199	198	tig00006949	671318	671708	391	*	Cor0063970.1	4.49887	Distal Intergenic	-1.42654	9.01189e-16	down	K09260//MADS-box transcription enhancer factor 2A	GO:0003677//molecular_function DNA binding;GO:0046983//molecular_function protein dimerization activity	PREDICTED: agamous-like MADS-box protein AGL61 [Juglans regia] >XP_018854407.1 PREDICTED: agamous-like MADS-box protein AGL61 [Juglans regia] >XP_018829535.1 PREDICTED: agamous-like MADS-box protein AGL61 [Juglans regia]	agamous-like MADS-box protein AGL61 {ECO:0000313|RefSeq:XP_018829535.1, ECO:0000313|RefSeq:XP_018835928.1, ECO:0000313|RefSeq:XP_018854407.1} OS=Juglans regia (English walnut) LOC109016451 {ECO:0000313|RefSeq:XP_018854407.1} PE=4	Agamous-like MADS-box protein AGL61 Protein DIANA OS=Arabidopsis thaliana (Mouse-ear cress) ORFNames=F27C12.24 PE=1	SRF-type transcription factor (DNA-binding and dimerisation domain)	[K] KOG0014 MADS box transcription factor	http://plntfdb.bio.uni-potsdam.de/v3.0/fam_mem.php?family_id=MADS	IPR002100; Transcription factor, MADS-box
HLJ728_peak_204	203	tig00006954	178898	179192	295	*	Cor0155580.1	4.24367	Promoter (1-2kb)	-1.50859	3.7574e-49	down	N/A	GO:0043531//molecular_function ADP binding	PREDICTED: uncharacterized protein LOC108986050 [Juglans regia] >XP_018814113.1 PREDICTED: uncharacterized protein LOC108986050 [Juglans regia]	uncharacterized protein LOC108986050 {ECO:0000313|RefSeq:XP_018814110.1, ECO:0000313|RefSeq:XP_018814113.1} OS=Juglans regia (English walnut) ECO:0000313|RefSeq:XP_018814113.1} PE=4	N/A	NB-ARC domain	[S] LSE0163 A Uncharacterized protein, contains TIR and AAA domains	N/A	IPR003593; AAA+ ATPase domain
HLJ728_peak_215	214	tig00006967	1102848	1103277	430	*	Cor0112100.1	5.6927	Distal Intergenic	-4.06402	0.00102564	down	#N/A	#N/A	#N/A	#N/A	#N/A	#N/A	#N/A	#N/A	#N/A
HLJ728_peak_240	239	tig00006977	130521	130839	319	*	Cor0175920.1	3.47187	Distal Intergenic	-2.17438	9.63702e-80	down	K10401//kinesin family member 18/19	GO:0003777//molecular_function microtubule motor activity;GO:0005524//molecular_function ATP binding;GO:0007018//biological_process microtubule-based movement;GO:0008017//molecular_function microtubule binding	PREDICTED: kinesin-like protein KIN-8A isoform X2 [Vitis vinifera]	Kinesin-like protein {ECO:0000256|RuleBase:RU000394} OS=Vitis vinifera (Grape) OrderedLocusNames=VIT_17s0000g04330 {ECO:0000313|EMBL:CCB43184.1} PE=3	Kinesin-like protein KIN-8A {ECO:0000305} OS=Arabidopsis thaliana (Mouse-ear cress) ORFNames=F25I16.11 {ECO:0000312|EMBL:AAF98419.1} PE=3	Kinesin motor domain	[Z] KOG0242 Kinesin-like protein	N/A	IPR027640; Kinesin-like protein
HLJ728_peak_249	248	tig00006985	1530218	1530508	291	*	Cor0022550.1	4.53608	Distal Intergenic	-1.17537	1.44736e-83	down	N/A	GO:0005515//molecular_function protein binding	PREDICTED: F-box protein At2g32560-like isoform X1 [Juglans regia]	F-box protein At2g32560-like isoform X2 {ECO:0000313|RefSeq:XP_018850952.1} OS=Juglans regia (English walnut) Name=LOC109013353 {ECO:0000313|RefSeq:XP_018850952.1} PE=4	F-box protein At2g32560 OS=Arabidopsis thaliana (Mouse-ear cress) OrderedLocusNames=At2g32560 ORFNames=T26B15.12 PE=2	F-box domain	[X] LSE1419 A Unnamed protein	N/A	IPR001810; F-box domain
HLJ728_peak_273	272	tig00006992	5511796	5512121	326	*	Cor0016770.1	4.83798	Exon (Cor0016760.1/Cor0016760, exon 7 of 7)	-4.50863	1.30847e-230	down	N/A	N/A	hypothetical protein MANES_17G096800 [Manihot esculenta]	Uncharacterized protein {ECO:0000313|EMBL:SPC77154.1} OS=Fagus sylvatica (Beechnut) ORFNames=FSB_LOCUS5036 {ECO:0000313|EMBL:SPC77154.1} PE=4	N/A	N/A	N/A	N/A	N/A
HLJ728_peak_313	311	tig00007006	704679	705020	342	*	Cor0168920.1	3.48344	Distal Intergenic	-1.11946	8.62746e-74	down	#N/A	#N/A	#N/A	#N/A	#N/A	#N/A	#N/A	#N/A	#N/A
HLJ728_peak_321	319	tig00007008	1327545	1327867	323	*	Cor0000860.1	3.54742	Promoter (<=1kb)	-1.7677	7.83571e-20	down	N/A	N/A	uncharacterized protein LOC111013677 isoform X3 [Momordica charantia]	Uncharacterized protein {ECO:0000313|EMBL:SPD17841.1} OS=Fagus sylvatica (Beechnut) ORFNames=FSB_LOCUS45723 {ECO:0000313|EMBL:SPD17841.1} PE=4	N/A	N/A	N/A	N/A	N/A
HLJ728_peak_347	345	tig00007017	163610	163897	288	*	Cor0083660.1	3.32808	Promoter (<=1kb)	-1.00031	0.00138142	down	K08245//phytepsin [EC:3.4.23.40]	GO:0006629//biological_process lipid metabolic process;GO:0004190//molecular_function aspartic-type endopeptidase activity;GO:0006508//biological_process proteolysis	PREDICTED: aspartic proteinase-like [Juglans regia]	aspartic proteinase-like {ECO:0000313|RefSeq:XP_018809452.1} OS=Juglans regia (English walnut) Name=LOC108982507 {ECO:0000313|RefSeq:XP_018809452.1} PE=3	Aspartic proteinase oryzasin-1 EC=3.4.23.- Precursor OS=Oryza sativa subsp. japonica (Rice) ORFNames=OJ1781_H11.11 PE=2	Eukaryotic aspartyl protease	[O] KOG1339 Aspartyl protease	N/A	IPR033121; Peptidase family A1 domain
HLJ728_peak_355	353	tig00007025	611850	612170	321	*	Cor0128680.1	3.37202	Promoter (1-2kb)	-1.53155	2.78281e-46	down	N/A	GO:0004650//molecular_function polygalacturonase activity;GO:0005975//biological_process carbohydrate metabolic process	PREDICTED: probable polygalacturonase isoform X1 [Juglans regia]	probable polygalacturonase isoform X1 {ECO:0000313|RefSeq:XP_018817971.1} OS=Juglans regia (English walnut) Name=LOC108988990 {ECO:0000313|RefSeq:XP_018817971.1} PE=3	Probable polygalacturonase Short=PG {ECO:0000250|UniProtKB:Q7M1E7} EC=3.2.1.15 Pectinase {ECO:0000250|UniProtKB:Q7M1E7} OS=Vitis vinifera (Grape) ORFNames=GSVIVT00026920001, LOC100243180 PE=1	Glycosyl hydrolases family 28	[R] TWOG0115 Endo-polygalacturonase	N/A	IPR006626; Parallel beta-helix repeat
HLJ728_peak_426	424	tig00007074	1442101	1442453	353	*	Cor0110720.1	3.38893	Distal Intergenic	-1.38247	3.75223e-46	down	N/A	GO:0005515//molecular_function protein binding	PREDICTED: tetratricopeptide repeat protein 7B [Juglans regia] >XP_018849523.1 PREDICTED: tetratricopeptide repeat protein 7B [Juglans regia] >XP_018849524.1 PREDICTED: tetratricopeptide repeat protein 7B [Juglans regia] >XP_018849525.1 PREDICTED: tetratricopeptide repeat protein 7B [Juglans regia]	Uncharacterized protein {ECO:0000313|EMBL:SPC75761.1} OS=Fagus sylvatica (Beechnut) ORFNames=FSB_LOCUS3643 {ECO:0000313|EMBL:SPC75761.1} PE=4	Protein NPGR1 {ECO:0000303|PubMed:12928497} NO POLLEN GERMINATION RELATED 1 {ECO:0000303|PubMed:12928497} OS=Arabidopsis thaliana (Mouse-ear cress) ORFNames=F17L21.25 {ECO:0000312|EMBL:AAF99738.1} PE=1	N/A	[T] KOG4162 Predicted calmodulin-binding protein	N/A	IPR019734; Tetratricopeptide repeat
HLJ728_peak_430	428	tig00007076	857211	857527	317	*	Cor0091090.1	3.68398	Promoter (1-2kb)	-1.00431	0.00286757	down	N/A	N/A	PREDICTED: uncharacterized protein LOC108980388 [Juglans regia]	Uncharacterized protein {ECO:0000313|EMBL:SPC83745.1} OS=Fagus sylvatica (Beechnut) ORFNames=FSB_LOCUS11627 {ECO:0000313|EMBL:SPC83745.1} PE=4	N/A	N/A	[X] LSE1606 A Unnamed protein	N/A	N/A
HLJ728_peak_476	474	tig00007105	72897	73182	286	*	Cor0098090.1	3.58226	Promoter (2-3kb)	-1.88437	4.70433e-08	down	N/A	N/A	PREDICTED: TATA-binding protein-associated factor 2N-like [Ziziphus jujuba]	Ran BP2/NZF zinc finger-like superfamily protein isoform 1 {ECO:0000313|EMBL:EOY26528.1} OS=Theobroma cacao (Cacao) (Cocoa) ORFNames=TCM_028315 {ECO:0000313|EMBL:EOY26528.1} PE=4	N/A	Zn-finger in Ran binding protein and others	[R] KOG4198 RNA-binding Ran Zn-finger protein and related proteins	N/A	IPR001876; Zinc finger, RanBP2-type
HLJ728_peak_484	482	tig00007105	1850855	1851156	302	*	Cor0099100.1	4.53608	Distal Intergenic	-1.07994	2.36152e-27	down	N/A	GO:0004672//molecular_function protein kinase activity;GO:0005524//molecular_function ATP binding;GO:0006468//biological_process protein phosphorylation	PREDICTED: probable receptor-like protein kinase At1g80640 isoform X1 [Juglans regia] >XP_018844327.1 PREDICTED: probable receptor-like protein kinase At1g80640 isoform X1 [Juglans regia]	probable receptor-like protein kinase At1g80640 isoform X1 {ECO:0000313|RefSeq:XP_018844326.1, ECO:0000313|RefSeq:XP_018844327.1} OS=Juglans regia (English walnut) ECO:0000313|RefSeq:XP_018844327.1} PE=4	Probable receptor-like protein kinase At1g80640 EC=2.7.11.1 Precursor OS=Arabidopsis thaliana (Mouse-ear cress) OrderedLocusNames=At1g80640 ORFNames=T21F11.3 PE=2	Protein kinase domain	[T] KOG1187 Serine/threonine protein kinase	N/A	IPR000719; Protein kinase domain
HLJ728_peak_502	500	tig00007112	1336182	1336666	485	*	Cor0008780.1	5.03587	Promoter (1-2kb)	-2.08008	0.000146894	down	N/A	GO:0005515//molecular_function protein binding	PREDICTED: putative ankyrin repeat protein RF_0381 [Ricinus communis]	Uncharacterized protein {ECO:0000313|EMBL:SPC89989.1} OS=Fagus sylvatica (Beechnut) ORFNames=FSB_LOCUS17871 {ECO:0000313|EMBL:SPC89989.1} PE=4	N/A	Ankyrin repeats (many copies)	[R] KOG0504 FOG: Ankyrin repeat	N/A	IPR020683; Ankyrin repeat-containing domain
HLJ728_peak_503	501	tig00007112	1600276	1600550	275	*	Cor0009010.1	3.48979	Promoter (1-2kb)	-1.34735	6.01201e-20	down	N/A	N/A	PREDICTED: uncharacterized protein LOC109229530 [Nicotiana attenuata] >OIT01230.1 hypothetical protein A4A49_12365 [Nicotiana attenuata]	Uncharacterized protein {ECO:0000313|EMBL:OIT01230.1} OS=Nicotiana attenuata (Coyote tobacco) ORFNames=A4A49_12365 {ECO:0000313|EMBL:OIT01230.1} PE=4	N/A	Domain of unknown function (DUF2828)	[X] LSE1376 A Unnamed protein	N/A	IPR024553; Domain of unknown function DUF2828
HLJ728_peak_506	504	tig00007112	2399410	2399811	402	*	Cor0009940.1	3.47922	Promoter (1-2kb)	-2.40321	3.37618e-233	down	N/A	GO:0005515//molecular_function protein binding	PREDICTED: plant intracellular Ras-group-related LRR protein 3-like [Juglans regia]	plant intracellular Ras-group-related LRR protein 3-like {ECO:0000313|RefSeq:XP_018818998.1} OS=Juglans regia (English walnut) Name=LOC108989733 {ECO:0000313|RefSeq:XP_018818998.1} PE=4	Plant intracellular Ras-group-related LRR protein 3 OS=Arabidopsis thaliana (Mouse-ear cress) Name=PIRL3 OrderedLocusNames=At1g12970 ORFNames=F13K23.23 PE=2	Leucine rich repeat	[R] KOG0619 FOG: Leucine rich repeat	N/A	IPR003591; Leucine-rich repeat, typical subtype
HLJ728_peak_508	506	tig00007112	3203967	3204269	303	*	Cor0010930.1	4.72266	Promoter (<=1kb)	-1.02638	4.68174e-11	down	N/A	N/A	PREDICTED: uncharacterized protein LOC109011669 isoform X1 [Juglans regia]	uncharacterized protein LOC109011669 isoform X1 {ECO:0000313|RefSeq:XP_018848500.1} OS=Juglans regia (English walnut) Name=LOC109011669 {ECO:0000313|RefSeq:XP_018848500.1} PE=4	Protein RICE SALT SENSITIVE 3 {ECO:0000303|PubMed:23715469} OS=Oryza sativa subsp. japonica (Rice) LOC_Os11g25920 {ECO:0000312|EMBL:ABA93307.2} PE=1	bHLH-MYC and R2R3-MYB transcription factors N-terminal	[RK] LSE0476 A Predicted bHLH transcription factor	N/A	IPR025610; Transcription factor MYC/MYB N-terminal
HLJ728_peak_531	529	tig00007124	588553	588843	291	*	Cor0175240.1	3.25297	Distal Intergenic	-1.97774	1.31161e-84	down	N/A	GO:0003777//molecular_function microtubule motor activity;GO:0007018//biological_process microtubule-based movement;GO:0005524//molecular_function ATP binding;GO:0008017//molecular_function microtubule binding	PREDICTED: kinesin-like protein KIN-10A [Juglans regia]	kinesin-like protein KIN-10A {ECO:0000313|RefSeq:XP_018820893.1} OS=Juglans regia (English walnut) Name=LOC108991185 {ECO:0000313|RefSeq:XP_018820893.1} PE=3	Kinesin-like protein KIN-10A {ECO:0000305} Phragmoplast-associated kinesin-related protein 2 {ECO:0000303|PubMed:11701879} Short=AtPAKRP2 {ECO:0000303|PubMed:11701879} OS=Arabidopsis thaliana (Mouse-ear cress) FCAALL.179 {ECO:0000312|EMBL:CAB78475.1} PE=1	Kinesin motor domain	[Z] KOG0243 Kinesin-like protein	N/A	IPR027640; Kinesin-like protein
HLJ728_peak_534	532	tig00007130	285295	285758	464	*	Cor0140470.1	4.38354	Downstream (1-2kb)	-1.4036	7.78087e-13	down	K14484//auxin-responsive protein IAA	GO:0005634//cellular_component nucleus;GO:0006355//biological_process regulation of transcription, DNA-templated;GO:0005515//molecular_function protein binding	PREDICTED: auxin-responsive protein IAA4-like [Juglans regia] >XP_018810753.1 PREDICTED: auxin-responsive protein IAA4-like [Juglans regia]	Auxin-responsive protein {ECO:0000256|RuleBase:RU004549} OS=Fagus sylvatica (Beechnut) ORFNames=FSB_LOCUS57586 {ECO:0000313|EMBL:SPD29704.1} PE=3	Auxin-induced protein 22B Indole-3-acetic acid-induced protein ARG4 OS=Vigna radiata var. radiata (Mung bean) (Phaseolus aureus) Name=AUX22B Synonyms=ARG4 PE=2	AUX/IAA family	[TR] LSE0302 A Auxin-inducible protein	N/A	IPR033389; AUX/IAA domain
HLJ728_peak_570	568	tig00007163	188795	189172	378	*	Cor0075250.1	3.48979	Exon (Cor0075250.1/Cor0075250, exon 3 of 3)	-1.17095	9.95234e-71	down	K09422//myb proto-oncogene protein, plant	N/A	transcription factor MYB61-like [Herrania umbratica]	Uncharacterized protein {ECO:0000313|EMBL:SPD30546.1} OS=Fagus sylvatica (Beechnut) ORFNames=FSB_LOCUS58428 {ECO:0000313|EMBL:SPD30546.1} PE=4	Transcription factor MYB61 {ECO:0000305} Myb-related protein 61 {ECO:0000305} Short=AtMYB61 {ECO:0000303|PubMed:16005292} OS=Arabidopsis thaliana (Mouse-ear cress) ORFNames=F14J9.20 {ECO:0000312|EMBL:AAC33214.1} PE=2	N/A	[K] KOG0048 Transcription factor, Myb superfamily	N/A	N/A
HLJ728_peak_617	615	tig00007182	179368	179651	284	*	Cor0144500.1	3.35921	Promoter (1-2kb)	-2.39664	3.37611e-10	down	K11296//high mobility group protein B3	N/A	PREDICTED: high mobility group B protein 7 [Juglans regia]	high mobility group B protein 7 {ECO:0000313|RefSeq:XP_018836307.1} OS=Juglans regia (English walnut) Name=LOC109002847 {ECO:0000313|RefSeq:XP_018836307.1} PE=4	High mobility group B protein 7 Nucleosome/chromatin assembly factor group D 07 Short=Nucleosome/chromatin assembly factor group D 7 Protein NUCLEAR FUSION DEFECTIVE 7 {ECO:0000303|PubMed:16698901} OS=Arabidopsis thaliana (Mouse-ear cress) OrderedLocusNames=At5g23420 ORFNames=K19M13.4 PE=1	HMG (high mobility group) box	[R] KOG0381 HMG box-containing protein	N/A	IPR009071; High mobility group box domain
HLJ728_peak_629	627	tig00007184	2552013	2552667	655	*	Cor0073290.1	3.29941	Promoter (1-2kb)	-2.86176	2.41432e-198	down	N/A	N/A	PREDICTED: uncharacterized protein LOC108984234 isoform X2 [Juglans regia]	uncharacterized protein LOC108984234 isoform X2 {ECO:0000313|RefSeq:XP_018811663.1} OS=Juglans regia (English walnut) Name=LOC108984234 {ECO:0000313|RefSeq:XP_018811663.1} PE=4	N/A	N/A	N/A	N/A	N/A
HLJ728_peak_687	685	tig00007244	765750	766024	275	*	Cor0106610.1	4.37553	Promoter (<=1kb)	-1.50408	3.25494e-54	down	N/A	N/A	PREDICTED: uncharacterized protein LOC109013755 isoform X1 [Juglans regia]	uncharacterized protein LOC109013755 isoform X1 {ECO:0000313|RefSeq:XP_018851502.1} OS=Juglans regia (English walnut) Name=LOC109013755 {ECO:0000313|RefSeq:XP_018851502.1} PE=4	N/A	N/A	N/A	N/A	N/A
HLJ728_peak_696	694	tig00007249	649098	649389	292	*	Cor0148680.1	3.61836	Promoter (2-3kb)	-1.4074	1.45538e-29	down	K18810//cyclin D1/2/4, plant	GO:0005634//cellular_component nucleus	PREDICTED: cyclin-D1-1-like [Juglans regia]	cyclin-D1-1-like {ECO:0000313|RefSeq:XP_018845812.1} OS=Juglans regia (English walnut) Name=LOC109009685 {ECO:0000313|RefSeq:XP_018845812.1} PE=3	Cyclin-D1-1 Cyclin-delta-1 Short=Cyclin-d1 G1/S-specific cyclin-D1-1 Short=CycD1 OS=Arabidopsis thaliana (Mouse-ear cress) ORFNames=F20P5.7 PE=1	Cyclin, C-terminal domain	[D] KOG0656 G1/S-specific cyclin D	N/A	IPR013763; Cyclin-like
HLJ728_peak_708	706	tig00007263	232920	233217	298	*	Cor0045230.1	4.33615	Distal Intergenic	-1.61106	3.93945e-64	down	N/A	N/A	PREDICTED: OTU domain-containing protein DDB_G0284757-like isoform X3 [Juglans regia]	OTU domain-containing protein DDB_G0284757-like isoform X3 {ECO:0000313|RefSeq:XP_018819800.1} OS=Juglans regia (English walnut) Name=LOC108990327 {ECO:0000313|RefSeq:XP_018819800.1} PE=4	N/A	OTU-like cysteine protease	[TO] KOG2605 OTU (ovarian tumor)-like cysteine protease	N/A	IPR003323; OTU domain
HLJ728_peak_720	718	tig00007265	886079	886456	378	*	Cor0086210.1	3.47922	Distal Intergenic	-1.03113	2.31077e-05	down	K10869//RAD51-like protein 1	GO:0000724//biological_process double-strand break repair via homologous recombination;GO:0003677//molecular_function DNA binding;GO:0006281//biological_process DNA repair;GO:0033063//cellular_component Rad51B-Rad51C-Rad51D-XRCC2 complex;GO:0005524//molecular_function ATP binding;GO:0008094//molecular_function DNA-dependent ATPase activity	PREDICTED: DNA repair protein RAD51 homolog 2 isoform X3 [Juglans regia]	DNA repair protein RAD51 homolog 2 isoform X3 {ECO:0000313|RefSeq:XP_018818821.1} OS=Juglans regia (English walnut) Name=LOC108989604 {ECO:0000313|RefSeq:XP_018818821.1} PE=4	DNA repair protein RAD51 homolog 2 Short=AtRAD51B OS=Arabidopsis thaliana (Mouse-ear cress) Name=RAD51B OrderedLocusNames=At2g28560 ORFNames=T17D12.12 PE=2	Rad51	[L] KOG1433 DNA repair protein RAD51/RHP55	N/A	IPR030548; DNA repair protein RAD51 homologue 2
HLJ728_peak_727	725	tig00007269	803614	803979	366	*	Cor0161920.1	3.62887	Promoter (<=1kb)	-1.34425	0.021137	down	N/A	N/A	PREDICTED: transcription factor RF2b-like [Juglans regia]	transcription factor RF2b-like {ECO:0000313|RefSeq:XP_018828447.1} OS=Juglans regia (English walnut) Name=LOC108996864 {ECO:0000313|RefSeq:XP_018828447.1} PE=4	bZIP transcription factor 18 {ECO:0000305} Short=AtbZIP18 {ECO:0000303|PubMed:11906833} Short=bZIP protein 18 {ECO:0000305} OS=Arabidopsis thaliana (Mouse-ear cress) ORFNames=T2P4.3 {ECO:0000312|EMBL:AAB87576.1} PE=1	N/A	N/A	N/A	N/A
HLJ728_peak_783	781	tig00007297	3447503	3447902	400	*	Cor0034420.1	3.43096	Distal Intergenic	-1.24091	1.11723e-40	down	N/A	GO:0043531//molecular_function ADP binding	PREDICTED: putative disease resistance protein At3g14460 [Juglans regia] >XP_018830917.1 PREDICTED: putative disease resistance protein At3g14460 [Juglans regia] >XP_018830919.1 PREDICTED: putative disease resistance protein At3g14460 [Juglans regia]	Uncharacterized protein {ECO:0000313|EMBL:SPD21546.1} OS=Fagus sylvatica (Beechnut) ORFNames=FSB_LOCUS49428 {ECO:0000313|EMBL:SPD21546.1} PE=3	Putative disease resistance RPP13-like protein 1 OS=Arabidopsis thaliana (Mouse-ear cress) Name=RPPL1 OrderedLocusNames=At3g14470 ORFNames=MOA2.9 PE=3	NB-ARC domain	[T] KOG4658 Apoptotic ATPase	N/A	IPR002182; NB-ARC
HLJ728_peak_808	806	tig00007317	548877	549242	366	*	Cor0138920.1	3.52188	Promoter (2-3kb)	-2.66746	1.19941e-174	down	K06627//cyclin A	GO:0005634//cellular_component nucleus	PREDICTED: cyclin-A2-2-like isoform X1 [Juglans regia] >XP_018834749.1 PREDICTED: cyclin-A2-2-like isoform X1 [Juglans regia] >XP_018834750.1 PREDICTED: cyclin-A2-2-like isoform X1 [Juglans regia] >XP_018834751.1 PREDICTED: cyclin-A2-2-like isoform X1 [Juglans regia]	cyclin-A2-2-like isoform X1 {ECO:0000313|RefSeq:XP_018834748.1, ECO:0000313|RefSeq:XP_018834749.1, ECO:0000313|RefSeq:XP_018834750.1} OS=Juglans regia (English walnut) ECO:0000313|RefSeq:XP_018834751.1} PE=3	Cyclin-A2-2 Cyc3b-At Cyclin-3b G2/mitotic-specific cyclin-A2-2 Short=CycA2 OS=Arabidopsis thaliana (Mouse-ear cress) ORFNames=F2I11.190 PE=2	Cyclin, N-terminal domain	[D] KOG0654 G2/Mitotic-specific cyclin A	N/A	IPR013763; Cyclin-like
HLJ728_peak_862	860	tig00007370	1784639	1785124	486	*	Cor0025580.1	4.10884	Downstream (1-2kb)	-2.1133	7.49162e-14	down	N/A	GO:0003700//molecular_function DNA-binding transcription factor activity;GO:0006355//biological_process regulation of transcription, DNA-templated;GO:0043565//molecular_function sequence-specific DNA binding	PREDICTED: probable WRKY transcription factor 65 [Juglans regia]	probable WRKY transcription factor 65 {ECO:0000313|RefSeq:XP_018846293.1} OS=Juglans regia (English walnut) Name=LOC109010041 {ECO:0000313|RefSeq:XP_018846293.1} PE=4	Probable WRKY transcription factor 65 WRKY DNA-binding protein 65 OS=Arabidopsis thaliana (Mouse-ear cress) Name=WRKY65 OrderedLocusNames=At1g29280 ORFNames=F28N24.4 PE=2	WRKY DNA -binding domain	[KT] LSE0036 A WRKY superfamily transcription factors	http://plntfdb.bio.uni-potsdam.de/v3.0/fam_mem.php?family_id=WRKY	IPR003657; WRKY domain
HLJ728_peak_886	884	tig00007416	129768	130110	343	*	Cor0187310.1	3.51219	Distal Intergenic	-1.06208	4.09535e-25	down	K17338//receptor expression-enhancing protein 1/2/3/4	N/A	PREDICTED: putative HVA22-like protein g [Juglans regia] >XP_018813099.1 PREDICTED: putative HVA22-like protein g [Juglans regia]	HVA22-like protein {ECO:0000256|RuleBase:RU362006} OS=Juglans regia (English walnut) ECO:0000313|RefSeq:XP_018813099.1} PE=3	HVA22-like protein i Short=AtHVA22i OS=Arabidopsis thaliana (Mouse-ear cress) Name=HVA22I OrderedLocusNames=At5g42560 ORFNames=K16E1.3 PE=2	TB2/DP1, HVA22 family	[V] KOG1726 HVA22/DP1 gene product-related proteins	N/A	IPR004345; TB2/DP1/HVA22-related protein
