# Supplementary material for: Genome-Wide Identification of the ARF Gene Family and ARF3 Target Genes Regulating Ovary Initiation in Hazel via ChIP Sequencing
Source: Front Plant Sci. 2021 Aug 10;12:715820. doi: 10.3389/fpls.2021.715820 (PMC8382943; doi:10.3389/fpls.2021.715820)
Supplement: Supplementary Table 5 — List of target genes involved in auxin synthesis, transport, and signaling pathways as well as regulation of ovule development in hazel. [file Table_5.XLSX]

## Sheet: Ov1.1,Ov2.1,Ov3.1
	Table S5 List of target genes involved in auxin synthesis, transport, and signaling pathways as well as regulation of ovule development in hazel
peak_name	Group	Gene ID	Abbreviation	Function	log2(Ov2/Ov1)	Padj	regulation
HLJ_peak_432	Ov1.1	Cor0100160.1	LAX5	Auxin transporter-like protein 5 AUX1-like protein 5 MtLAX5 OS=Medicago truncatula (Barrel medic) (Medicago tribuloides) Name=LAX5 PE=2	1.06522	1.50987e-36	up
HLJ_peak_722	Ov1.1	Cor0110070.1	IAA9	Auxin-responsive protein IAA9 Indoleacetic acid-induced protein 9 OS=Arabidopsis thaliana (Mouse-ear cress) Name=IAA9 OrderedLocusNames=At5g65670 ORFNames=F6H11.210, MPA24.1 PE=1	1.23948	7.23803e-170	up
HLJ_peak_445	Ov1.1	Cor0005180.1	EFM	Myb family transcription factor EFM {ECO:0000303|PubMed:25132385} MYB-domain transcription factor HHO4 {ECO:0000305} Protein EARLY FLOWERING MYB {ECO:0000303|PubMed:25132385} Protein HRS1 HOMOLOG 4 {ECO:0000305} OS=Arabidopsis thaliana (Mouse-ear cress) ORFNames=T4M8.7 {ECO:0000312|EMBL:AAL31188.1} PE=1	1.32023	2.40206e-117	up
HLJ_peak_568	Ov1.1	Cor0080460.1	bHLH153	Transcription factor bHLH153 BHLH transcription factor alpha Short=bHLH alpha {ECO:0000312|EMBL:CAE09167.1} Basic helix-loop-helix protein 153 Short=AtbHLH153 {ECO:0000303|PubMed:14600211} Short=bHLH 153 bHLH transcription factor bHLH153 OS=Arabidopsis thaliana (Mouse-ear cress) ORFNames=F3F20.16 {ECO:0000312|EMBL:AAD30624.1} PE=1	1.32965	1.12517e-103	up
HLJ_peak_396	Ov1.1	Cor0115340.1	Pla a 1	Putative invertase inhibitor Pollen allergen Pla a 1 Precursor OS=Platanus acerifolia (London plane tree) PE=1	1.41871	6.86213e-18	up
HLJ_peak_239	Ov1.1	Cor0096370.1	IAA30	Auxin-responsive protein IAA30 Indoleacetic acid-induced protein 30 OS=Arabidopsis thaliana (Mouse-ear cress) Name=IAA30 OrderedLocusNames=At3g62100 ORFNames=T17J13.60 PE=2	2.42754	1.43337e-80	up
HLJ_peak_437	Ov1.1	Cor0100570.1	bHLH21	Transcription factor ABORTED MICROSPORES Basic helix-loop-helix protein 21 Short=AtbHLH21 Short=bHLH 21 Transcription factor EN 48 bHLH transcription factor bHLH021 OS=Arabidopsis thaliana (Mouse-ear cress) ORFNames=F12A24.9 PE=1	2.45502	0.00276865	up
HLJ_peak_644	Ov1.1	Cor0092760.1	MYB306	Myb-related protein 306 OS=Antirrhinum majus (Garden snapdragon) Name=MYB306 {ECO:0000303|PubMed:1840903} PE=2	2.73446	4.0404e-115	up
HLJ_peak_367	Ov1.1	Cor0043840.1	TCP18	Transcription factor TCP18 Protein BRANCHED 1 Protein TEOSINTE BRANCHED 1-LIKE 1 OS=Arabidopsis thaliana (Mouse-ear cress) ORFNames=K24M9.4 PE=1	2.97254	0.0074693	up
HLJ_peak_1005	Ov1.1	Cor0157210.1	SAUR32	Auxin-responsive protein SAUR32 {ECO:0000305} Protein ABOLISHED APICAL HOOK MAINTENANCE 1 {ECO:0000303|Ref.6} Protein SMALL AUXIN UP RNA 32 {ECO:0000303|PubMed:12036261} OS=Arabidopsis thaliana (Mouse-ear cress) OrderedLocusNames=At2g46690 {ECO:0000312|Araport:AT2G46690} PE=2	3.75137	6.34417e-54	up
HLJ_peak_1323	Ov1.1	Cor0146070.1	NAC25	NAC transcription factor 25 Short=AtNAC025 OS=Arabidopsis thaliana (Mouse-ear cress) OrderedLocusNames=At1g61110 ORFNames=F11P17.16 PE=2	4.12816	1.55498e-167	up
HLJ_peak_939	Ov1.1	Cor0083230.1	SOC1/OsMADS50	MADS-box transcription factor 50 Short=OsMADS50 Protein AGAMOUS-like 20 Protein SUPPRESSOR OF CONSTANS OVEREXPRESSION 1-like Short=OsSOC1 RMADS208 OS=Oryza sativa subsp. japonica (Rice) OrderedLocusNames=Os03g0122600, LOC_Os03g03070 ORFNames=OJ1126B12.8 PE=2	6.05908	1.11291e-170	up
HLJ_peak_662	Ov1.1	Cor0094410.1	MYB98	Transcription factor MYB98 {ECO:0000303|PubMed:11597504} Myb-related protein 98 {ECO:0000303|PubMed:11597504} Short=AtMYB98 {ECO:0000303|PubMed:11597504} OS=Arabidopsis thaliana (Mouse-ear cress) ORFNames=F28A21.180 {ECO:0000312|EMBL:CAB37462.1} PE=2	7.24929	2.98279e-46	up
HLJ_peak_1242	Ov1.1	Cor0034390.1	YUC10	Probable indole-3-pyruvate monooxygenase YUCCA10 EC=1.14.13.168 Flavin-containing monooxygenase YUCCA10 OS=Arabidopsis thaliana (Mouse-ear cress) ORFNames=F27K7.7 PE=2	8.95705	1.53928e-08	up
	Ov1.1	Cor0106490.1	PLT2	AP2-like ethylene-responsive transcription factor PLT2 Protein AINTEGUMENTA-LIKE 4 Protein PLETHORA 2 OS=Arabidopsis thaliana (Mouse-ear cress) ORFNames=F11M15.6 PE=2	5.62731	0.0089318	up
HLJ619_peak_203	Ov2.1	Cor0190850.1	Pla a 2	Exopolygalacturonase EC=3.2.1.67 Pollen allergen Pla a 2 Precursor; Fragment OS=Platanus acerifolia (London plane tree) Name=plaa2 {ECO:0000312|EMBL:CAE52833.1} PE=1	-4.88732	0.0331038	down
HLJ619_peak_1003	Ov2.1	Cor0190170.1	KUA1	Transcription factor KUA1 {ECO:0000303|PubMed:24806884} Myb-related protein H {ECO:0000303|PubMed:23888064} Short=AtMYBH {ECO:0000303|PubMed:23888064} Short=AtMYBS3 {ECO:0000303|PubMed:25920996} Short=MYBS3-homolg protein {ECO:0000303|PubMed:25920996} Protein KUODA1 {ECO:0000303|PubMed:24806884} OS=Arabidopsis thaliana (Mouse-ear cress) ORFNames=MQL5.25 {ECO:0000312|EMBL:BAA97173.1} PE=1	-4.20998	3.99796e-175	down
HLJ619_peak_1116	Ov2.1	Cor0086990.1	IAA4	IAA4,Auxin-induced protein 22D Indole-3-acetic acid-induced protein ARG13 OS=Vigna radiata var. radiata (Mung bean) (Phaseolus aureus) Name=AUX22D Synonyms=ARG13 PE=2	-4.05387	2.62514e-121	down
HLJ619_peak_113	Ov2.1	Cor0134090.1	MYB86	Transcription factor MYB86 Myb homolog 4 Short=AtMyb4 Myb-related protein 86 Short=AtMYB86 OS=Arabidopsis thaliana (Mouse-ear cress) ORFNames=F21E10.4 PE=2	-3.9549	1.84013e-16	down
HLJ619_peak_302	Ov2.1	Cor0204530.1	PIN7	Protein PIN-LIKES 7 {ECO:0000303|PubMed:22504182} Auxin efflux carrier-like protein 7 {ECO:0000303|PubMed:22504182} OS=Arabidopsis thaliana (Mouse-ear cress) ORFNames=K2A18.4 {ECO:0000312|EMBL:BAB10403.1} PE=2	-3.48415	0	down
HLJ619_peak_741	Ov2.1	Cor0152090.1	SOC1/AGL20	MADS-box protein SOC1 Agamous-like MADS-box protein AGL20 Protein SUPPRESSOR OF CONSTANS OVEREXPRESSION 1 OS=Arabidopsis thaliana (Mouse-ear cress) ORFNames=F17K2.19 PE=1	-2.83063	9.74949e-09	down
HLJ619_peak_30	Ov2.1	Cor0051420.1	ATHB-8	Homeobox-leucine zipper protein ATHB-8 HD-ZIP protein ATHB-8 Homeodomain transcription factor ATHB-8 OS=Arabidopsis thaliana (Mouse-ear cress) ORFNames=T16I18.90 PE=1	-2.69687	0	down
HLJ619_peak_353	Ov2.1	Cor0043840.1	TCP18	Transcription factor TCP18 Protein BRANCHED 1 Protein TEOSINTE BRANCHED 1-LIKE 1 OS=Arabidopsis thaliana (Mouse-ear cress) ORFNames=K24M9.4 PE=1	-2.64951	0.00815591	down
HLJ619_peak_1089	Ov2.1	Cor0032980.1	AGL21	Agamous-like MADS-box protein AGL21 OS=Arabidopsis thaliana (Mouse-ear cress) Name=AGL21 OrderedLocusNames=At4g37940 ORFNames=F20D10.60 PE=1	-2.50937	5.53372e-226	down
HLJ619_peak_470	Ov2.1	Cor0007180.1	bHLH111	Transcription factor bHLH111 Basic helix-loop-helix protein 111 Short=AtbHLH111 Short=bHLH 111 Transcription factor EN 66 bHLH transcription factor bHLH111 OS=Arabidopsis thaliana (Mouse-ear cress) ORFNames=F17F8.3 PE=2	-2.33835	1.40353e-11	down
HLJ619_peak_369	Ov2.1	Cor0022460.1	bHLH106	Transcription factor bHLH106 Basic helix-loop-helix protein 106 Short=AtbHLH106 Short=bHLH 106 Transcription factor EN 56 bHLH transcription factor bHLH106 OS=Arabidopsis thaliana (Mouse-ear cress) ORFNames=T3K9.10 PE=2	-2.25781	8.97287e-95	down
HLJ619_peak_106	Ov2.1	Cor0120020.1	TCP14	Transcription factor TCP14 {ECO:0000305} Short=AtTCP14 {ECO:0000303|PubMed:17953649} OS=Arabidopsis thaliana (Mouse-ear cress) ORFNames=F1P2.170 {ECO:0000312|EMBL:CAB61988.1} PE=1	-2.2084	5.20356e-28	down
HLJ619_peak_513	Ov2.1	Cor0036810.1	SAUR32	Auxin-responsive protein SAUR32 {ECO:0000305} Protein ABOLISHED APICAL HOOK MAINTENANCE 1 {ECO:0000303|Ref.6} Protein SMALL AUXIN UP RNA 32 {ECO:0000303|PubMed:12036261} OS=Arabidopsis thaliana (Mouse-ear cress) OrderedLocusNames=At2g46690 {ECO:0000312|Araport:AT2G46690} PE=2	-2.15002	1.38239e-45	down
HLJ619_peak_610	Ov2.1	Cor0188960.1	STK/AGL11	Agamous-like MADS-box protein AGL11 Protein SEEDSTICK OS=Arabidopsis thaliana (Mouse-ear cress) ORFNames=T5L19.90 PE=1	-2.13375	0	down
HLJ619_peak_340	Ov2.1	Cor0042500.1	MYB4	Transcription repressor MYB4 Myb-related protein 4 Short=AtMYB4 OS=Arabidopsis thaliana (Mouse-ear cress) Name=MYB4 OrderedLocusNames=At4g38620 ORFNames=F20M13.180 PE=1	-1.95847	9.14586e-07	down
HLJ619_peak_615	Ov2.1	Cor0192010.1	ChARF8	Auxin response factor 8 Protein FRUIT WITHOUT FERTILIZATION OS=Arabidopsis thaliana (Mouse-ear cress) ORFNames=K15O15.5 PE=1	-1.8746	3.56442e-242	down
HLJ619_peak_1278	Ov2.1	Cor0104710.1	bHLH62	Transcription factor bHLH62 Basic helix-loop-helix protein 62 Short=AtbHLH62 Short=bHLH 62 Transcription factor EN 85 bHLH transcription factor bHLH062 OS=Arabidopsis thaliana (Mouse-ear cress) ORFNames=F21O3.5 PE=2	-1.84816	3.49809e-55	down
HLJ619_peak_387	Ov2.1	Cor0024610.1	FT7	FT-interacting protein 7 {ECO:0000303|PubMed:29915329} Short=OsFTIP7 {ECO:0000303|PubMed:29915329} OS=Oryza sativa subsp. japonica (Rice) OsJ_18293 {ECO:0000312|EMBL:EEE63479.1} PE=1	-1.83301	0.00967879	down
HLJ619_peak_339	Ov2.1	Cor0042490.1	MYB4	Transcription repressor MYB4 Myb-related protein 4 Short=AtMYB4 OS=Arabidopsis thaliana (Mouse-ear cress) Name=MYB4 OrderedLocusNames=At4g38620 ORFNames=F20M13.180 PE=1	-1.81552	0.00309212	down
HLJ619_peak_674	Ov2.1	Cor0128360.1	bHLH35	Transcription factor bHLH35 Basic helix-loop-helix protein 35 Short=AtbHLH35 Short=bHLH 35 Transcription factor EN 41 bHLH transcription factor bHLH035 OS=Arabidopsis thaliana (Mouse-ear cress) ORFNames=MUL3.10 PE=2	-1.75895	3.72836e-24	down
HLJ619_peak_93	Ov2.1	Cor0209610.1	FT3	FT-interacting protein 3 {ECO:0000303|PubMed:29742441} Multiple C2 domain and transmembrane region protein 3 {ECO:0000303|PubMed:29259105} OS=Arabidopsis thaliana (Mouse-ear cress) ORFNames=T10K17.90 {ECO:0000312|EMBL:CAB67616.1} PE=1	-1.69136	0.0285428	down
HLJ619_peak_742	Ov2.1	Cor0152110.1	MFO1/OsMADS6	MADS-box transcription factor 6 OsMADS6 Protein MOSAIC FLORAL ORGANS 1 OS=Oryza sativa subsp. japonica (Rice) ORFNames=OJ1123_G04.6, OsJ_07942 PE=1	-1.56819	7.02991e-280	down
HLJ619_peak_312	Ov2.1	Cor0212450.1	MYB97	Transcription factor MYB97 {ECO:0000303|PubMed:11597504} Myb-related protein 97 {ECO:0000303|PubMed:11597504} Short=AtMYB97 {ECO:0000303|PubMed:11597504} OS=Arabidopsis thaliana (Mouse-ear cress) ORFNames=F10M23.270 {ECO:0000312|EMBL:CAB36539.1} PE=2	-1.37325	8.79633e-62	down
HLJ619_peak_1062	Ov2.1	Cor0188090.1	LHW	Transcription factor LHW BHLH transcription factor delta Short=bHLH delta Basic helix-loop-helix protein 156 Short=AtbHLH156 Short=bHLH 156 Protein LONESOME HIGHWAY bHLH transcription factor bHLH156 OS=Arabidopsis thaliana (Mouse-ear cress) ORFNames=F12K2 PE=1	-1.24783	9.82876e-105	down
HLJ619_peak_242	Ov2.1	Cor0179200.1	YUC10	Probable indole-3-pyruvate monooxygenase YUCCA10 EC=1.14.13.168 Flavin-containing monooxygenase YUCCA10 OS=Arabidopsis thaliana (Mouse-ear cress) ORFNames=F27K7.7 PE=2	-1.19445	2.54866e-21	down
HLJ619_peak_1233	Ov2.1	Cor0138630.1	AKT1	Potassium channel AKT6 Potassium channel SPIK Shaker pollen inward rectifier K(+) channel OS=Arabidopsis thaliana (Mouse-ear cress) ORFNames=F3N11.5 PE=1	-1.02416	7.62754e-31	down
	Ov2.1	Cor0220710.1	ERF1A	Ethylene-responsive transcription factor 1A Short=AtERF1A Ethylene-responsive element-binding factor 1A Short=EREBP-1A OS=Arabidopsis thaliana (Mouse-ear cress) ORFNames=dl4785w, FCAALL.123 PE=1	-2.24547	6.17374e-89	down
	Ov2.1	Cor0221350.1	ERF4	Ethylene-responsive transcription factor 4 Short=AtERF4 Ethylene-responsive element-binding factor 4 Short=EREBP-4 Protein RELATED TO APETALA2 5 OS=Arabidopsis thaliana (Mouse-ear cress) OrderedLocusNames=At3g15210 ORFNames=K7L4.1 PE=1	-1.6824	8.71167e-130	down
	Ov2.1	Cor0068280.1	ERF1B	Ethylene-responsive transcription factor 1B Short=AtERF1B Ethylene-responsive element-binding factor 1B Short=EREBP-1B OS=Arabidopsis thaliana (Mouse-ear cress) ORFNames=K14B15.15 PE=1	-2.15432	4.60207e-07	down
HLJOv3.1_peak_862	Ov3.1	Cor0025580.1	WRKY65	Probable WRKY transcription factor 65 WRKY DNA-binding protein 65 OS=Arabidopsis thaliana (Mouse-ear cress) Name=WRKY65 OrderedLocusNames=At1g29280 ORFNames=F28N24.4 PE=2	-2.1133	7.49162e-14	down
HLJOv3.1_peak_199	Ov3.1	Cor0063970.1	AGL61/DIANA	Agamous-like MADS-box protein AGL61 Protein DIANA OS=Arabidopsis thaliana (Mouse-ear cress) ORFNames=F27C12.24 PE=1	-1.42654	9.01189e-16	down
HLJOv3.1_peak_534	Ov3.1	Cor0140470.1	IAA4	Auxin-induced protein 22B Indole-3-acetic acid-induced protein ARG4 OS=Vigna radiata var. radiata (Mung bean) (Phaseolus aureus) Name=AUX22B Synonyms=ARG4 PE=2	-1.4036	7.78087e-13	down
HLJOv3.1_peak_426	Ov3.1	Cor0110720.1	NPGR1	Protein NPGR1 {ECO:0000303|PubMed:12928497} NO POLLEN GERMINATION RELATED 1 {ECO:0000303|PubMed:12928497} OS=Arabidopsis thaliana (Mouse-ear cress) ORFNames=F17L21.25 {ECO:0000312|EMBL:AAF99738.1} PE=1	-1.38247	3.75223e-46	down
HLJOv3.1_peak_727	Ov3.1	Cor0161920.1	bZIP18	bZIP transcription factor 18 {ECO:0000305} Short=AtbZIP18 {ECO:0000303|PubMed:11906833} Short=bZIP protein 18 {ECO:0000305} OS=Arabidopsis thaliana (Mouse-ear cress) ORFNames=T2P4.3 {ECO:0000312|EMBL:AAB87576.1} PE=1	-1.34425	0.021137	down
OV3-6	Ov3.1	Cor0126310.1	LFY	LEAFY {ECO:0000313|EMBL:AKN56864.1} OS=Betula platyphylla (Asian white birch) Name=LEAFY {ECO:0000313|EMBL:AKN56864.1} PE=2	-1.27187	0.000166714	down
